# Supplementary material for: Development and application of a forensic toxicological library for identification of 56 natural toxic substances by liquid chromatography–quadrupole time-of-flight mass spectrometry
Source: Springer Nature journal article supplement (doi:10.1007/s11419-019-00506-w), 2019-11-17
Supplement: MOESM1 [file 17398346]

# 1. Tetrodotoxin

**a** 20 eV

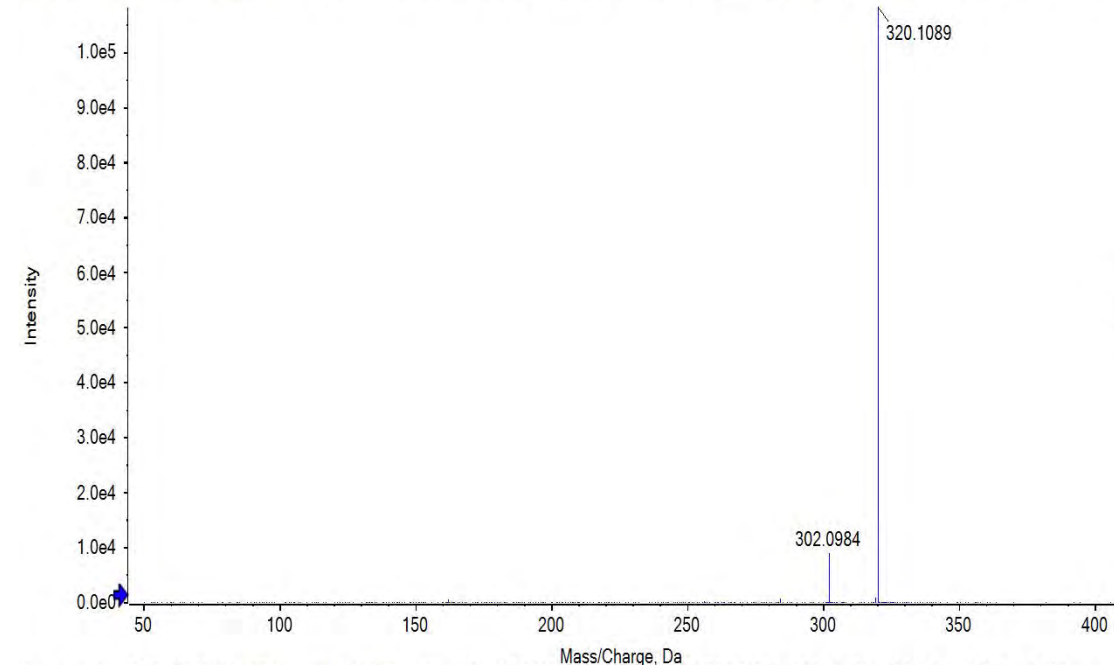

**b** 35eV

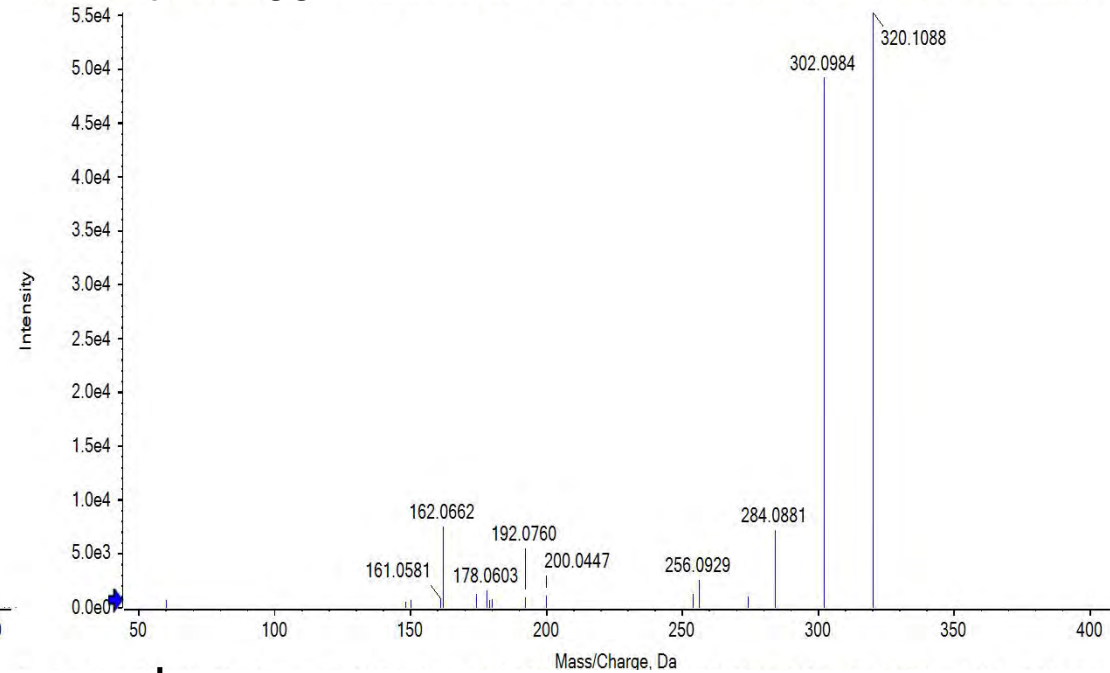

**c** 50 eV

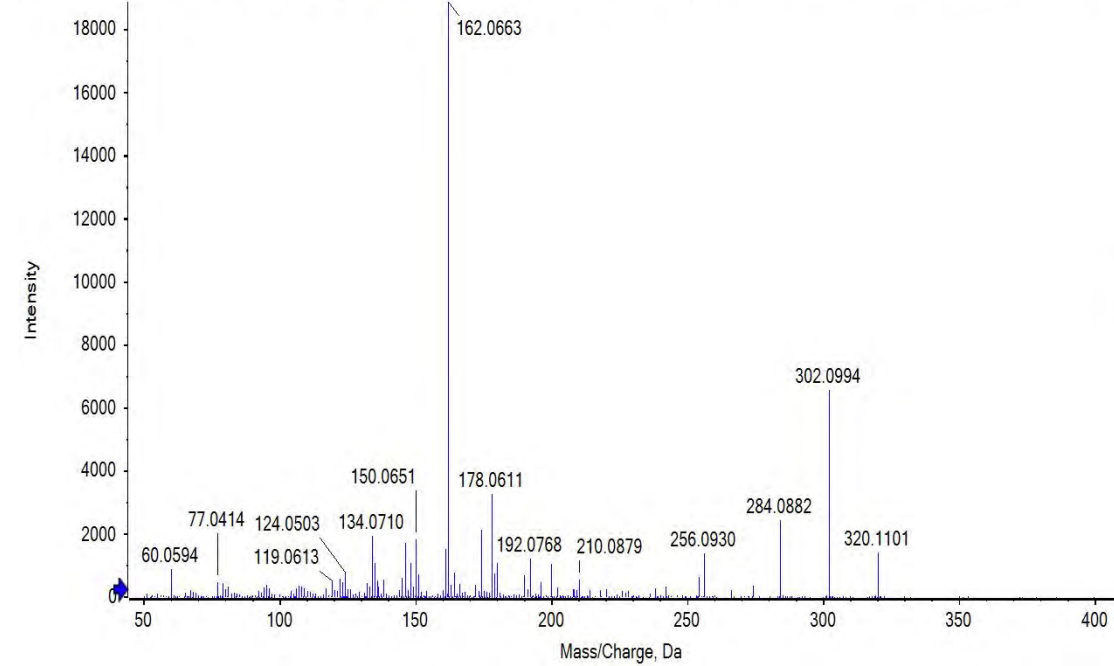

**d** CES

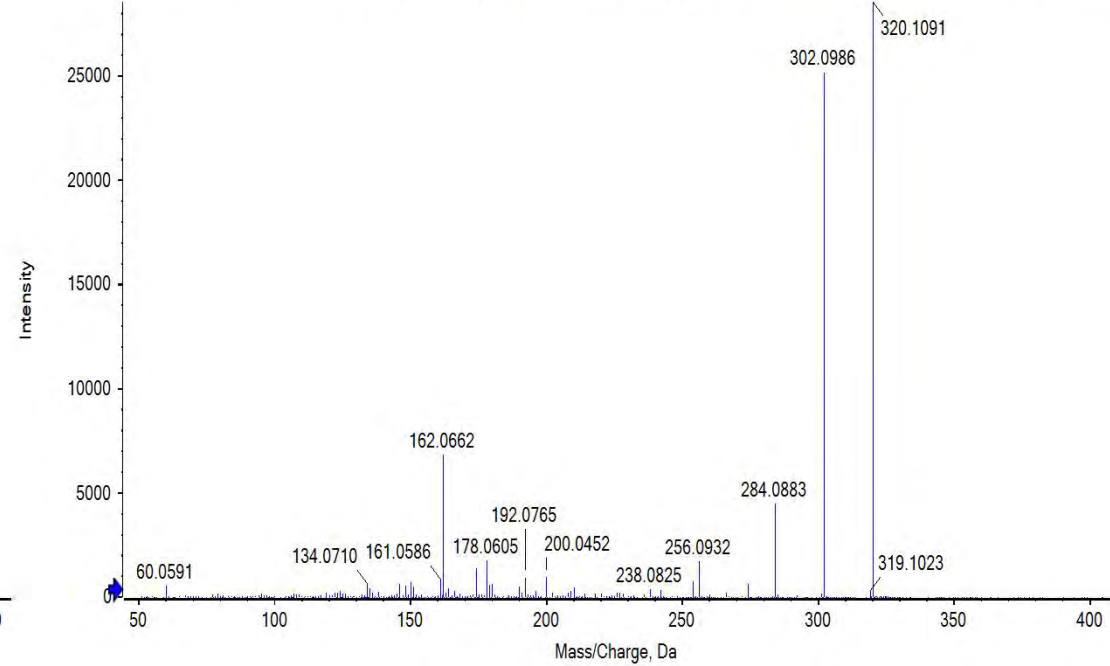

## 2. Muscimol

**a** 20 eV

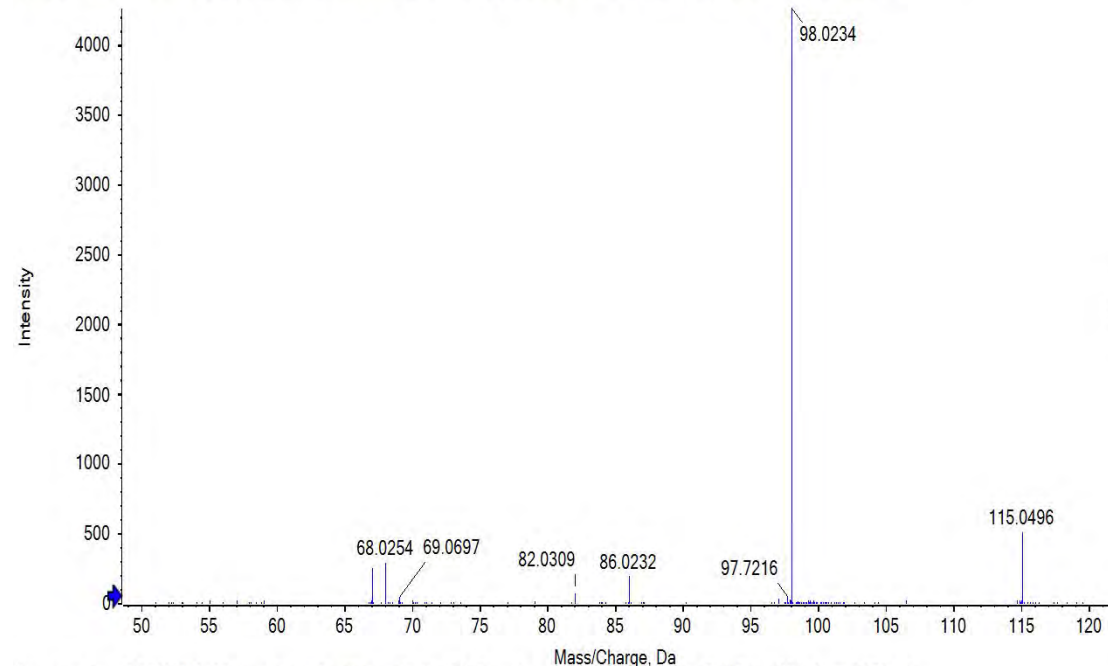

**b** 35eV

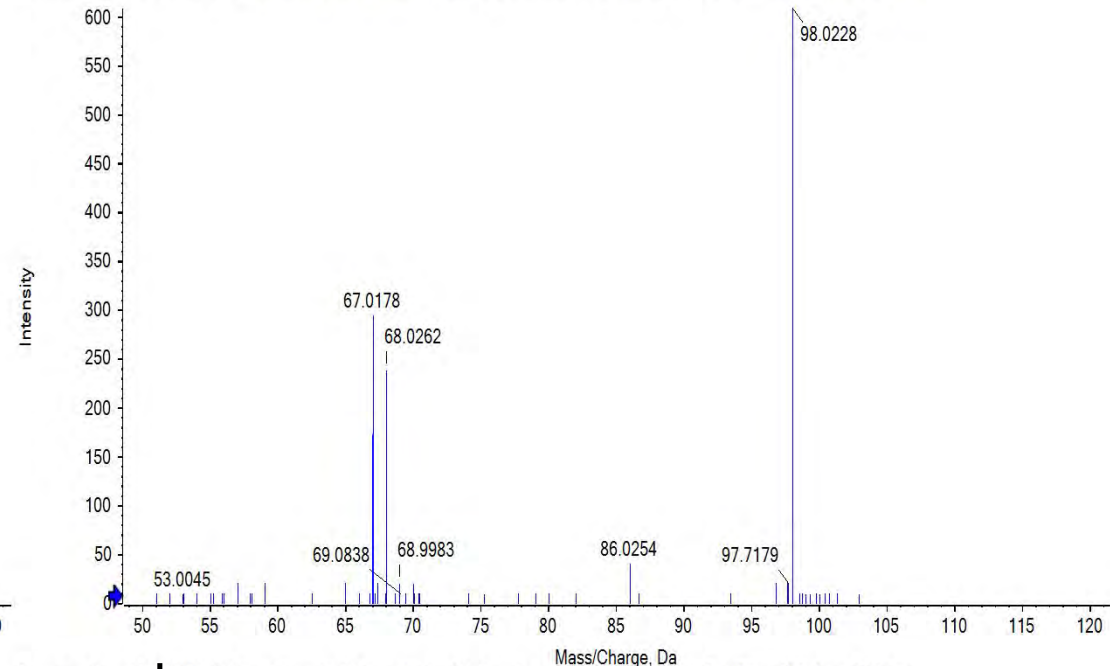

**c** 50 eV

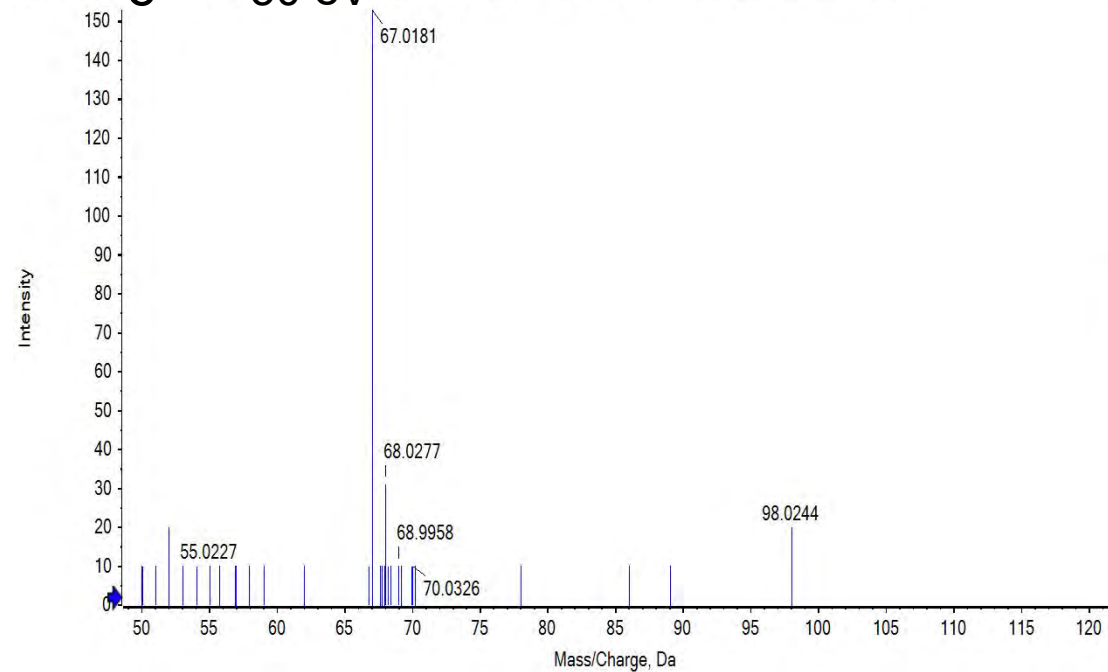

**d** CES

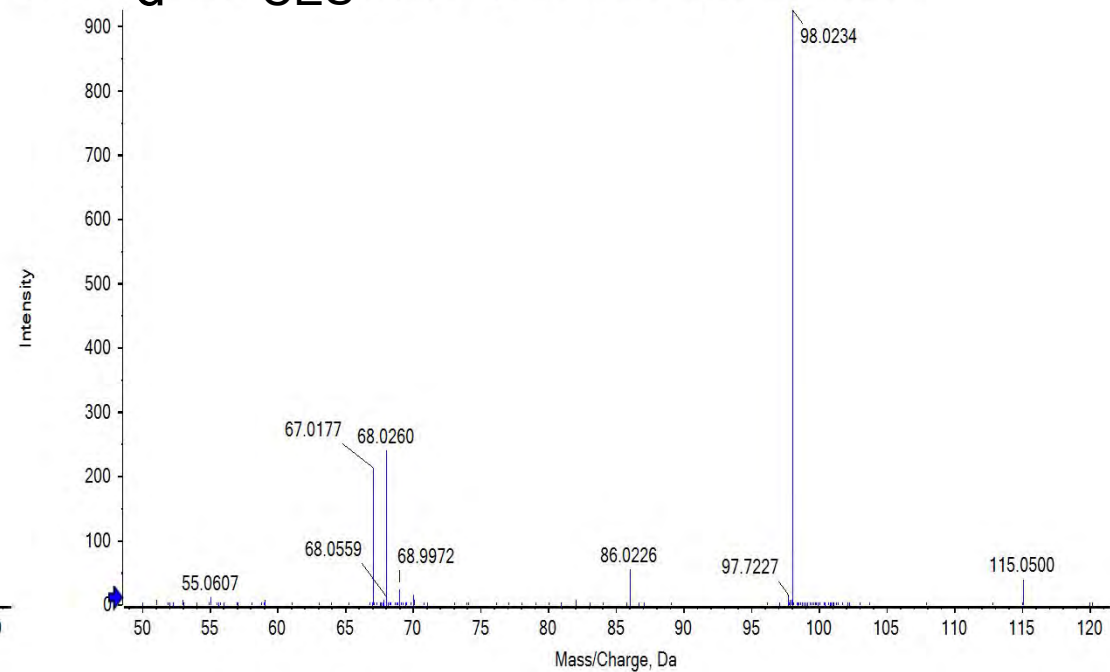

### 3. Ibotenic acid

**a** 20 eV

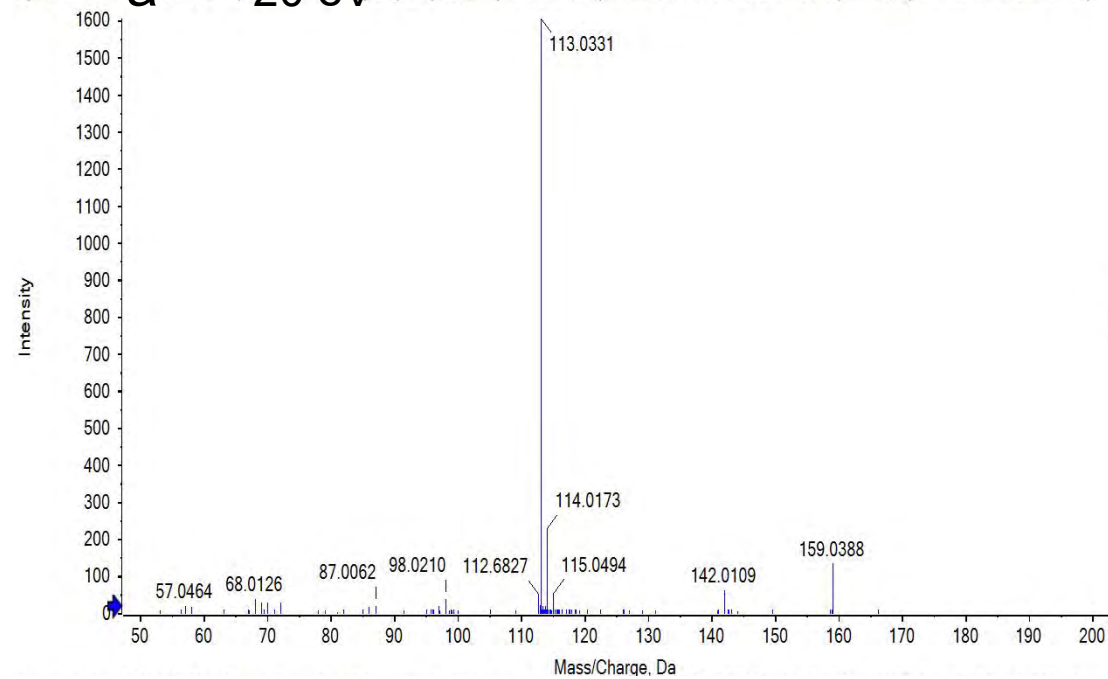

**b** 35eV

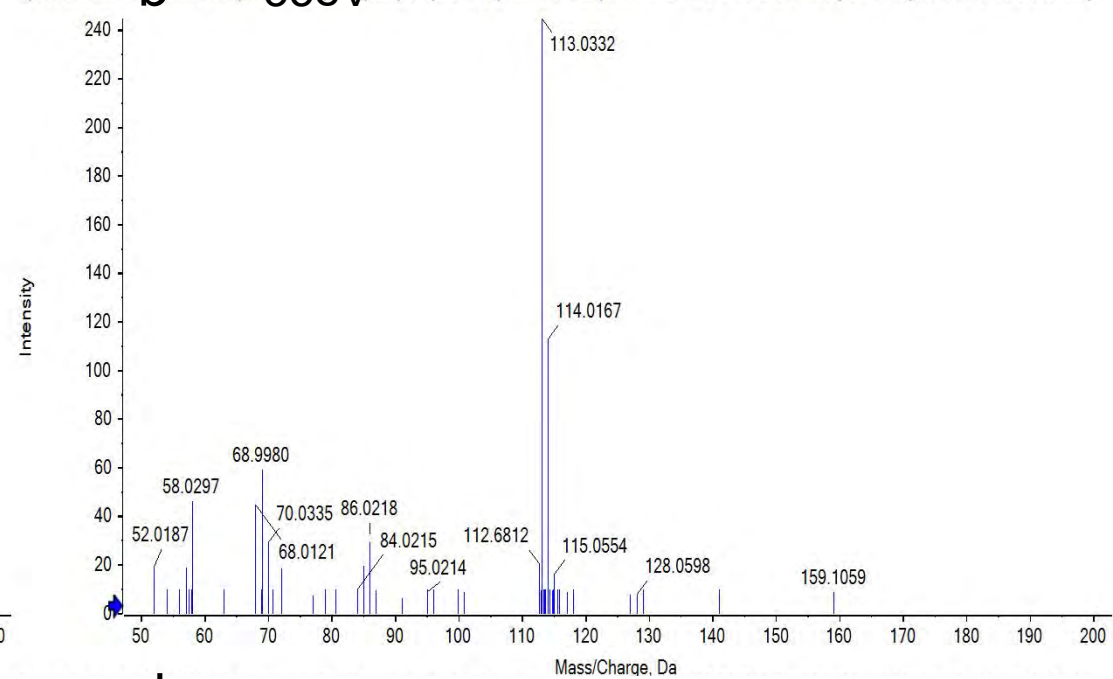

**c** 50 eV

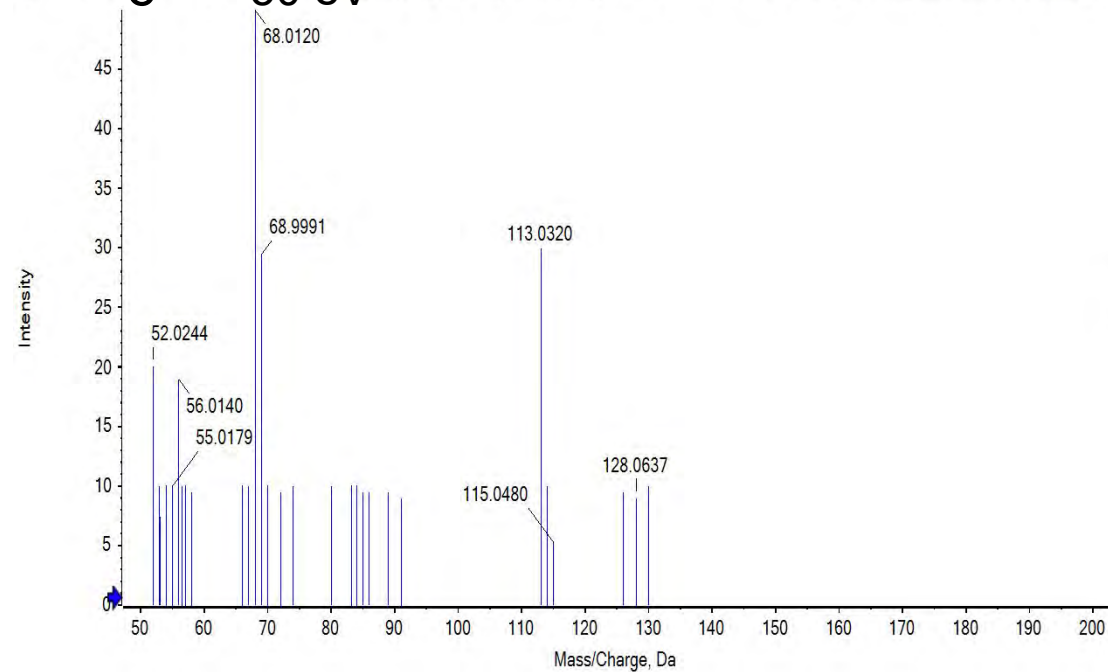

**d** CES

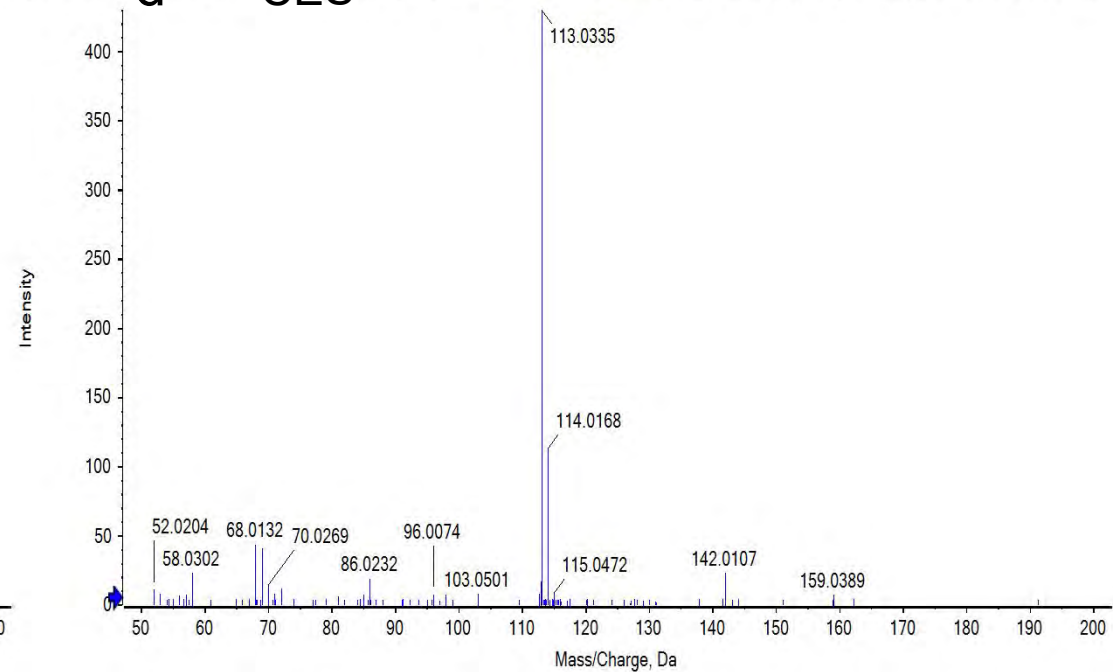

# 4. Muscarine

**a** 20 eV

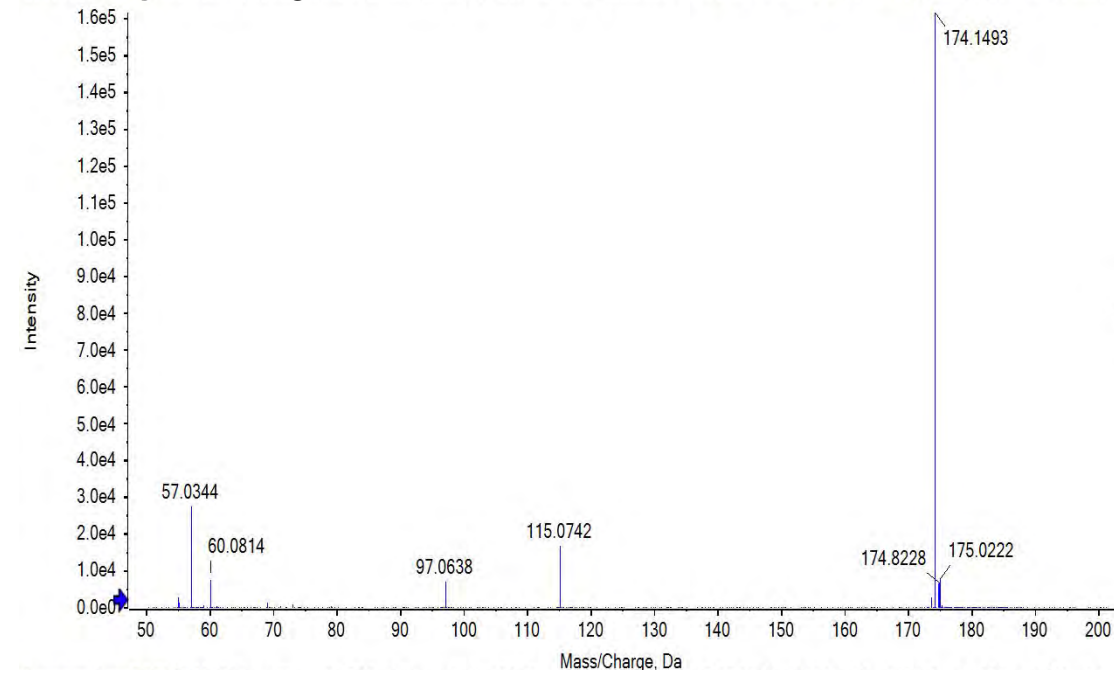

**b** 35eV

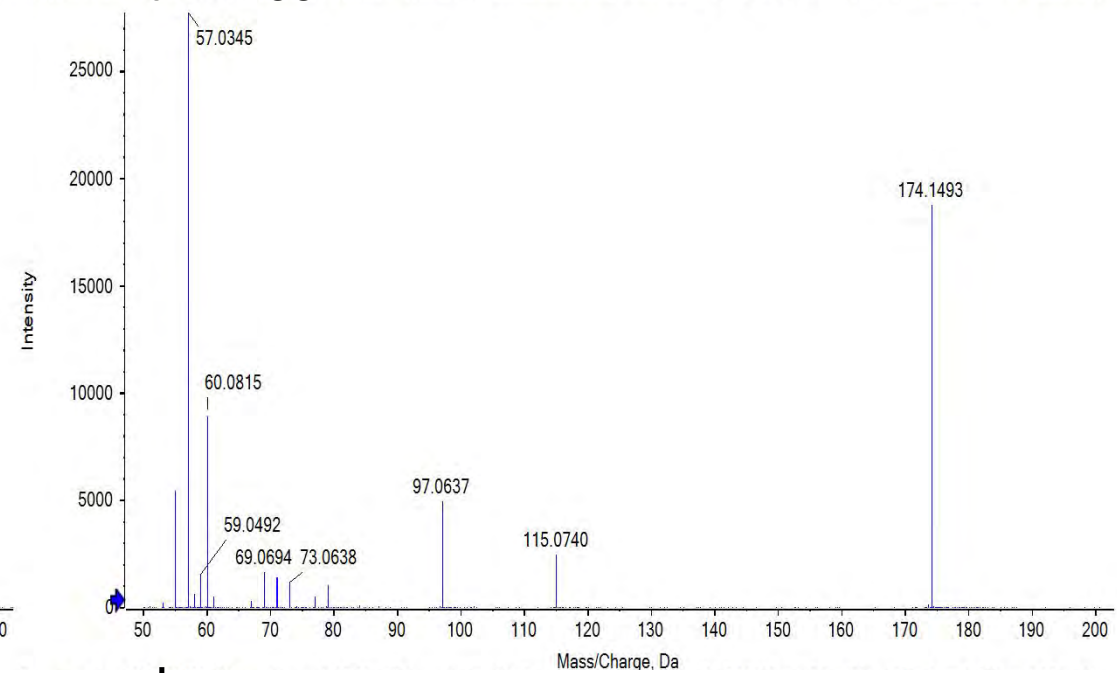

**c** 50 eV

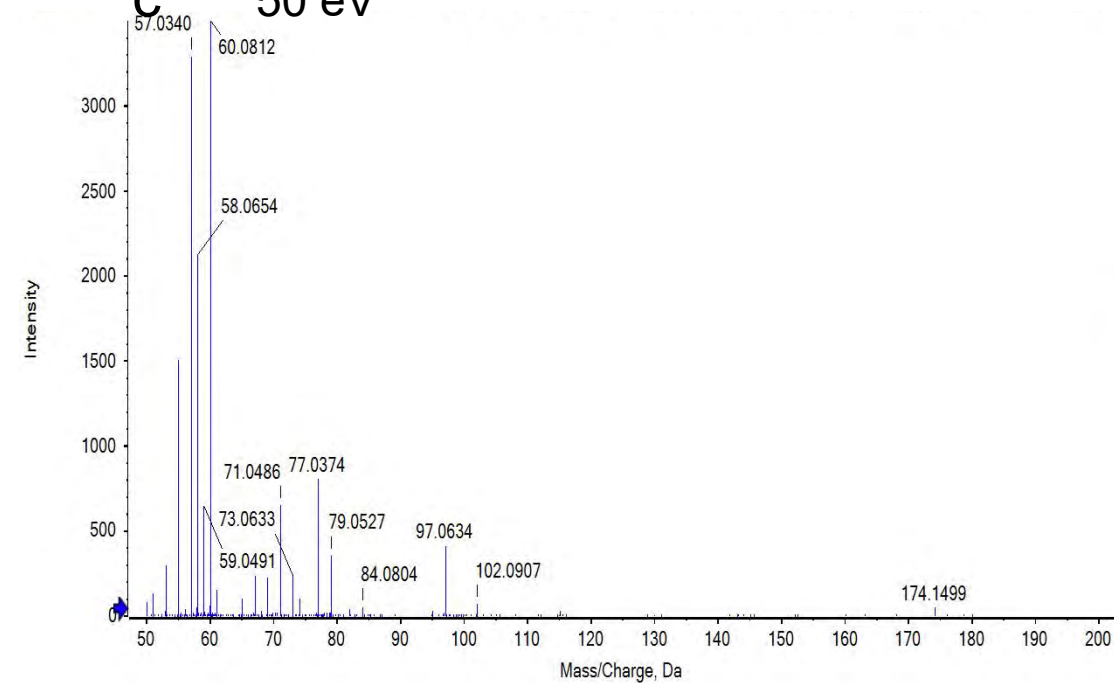

**d** CES

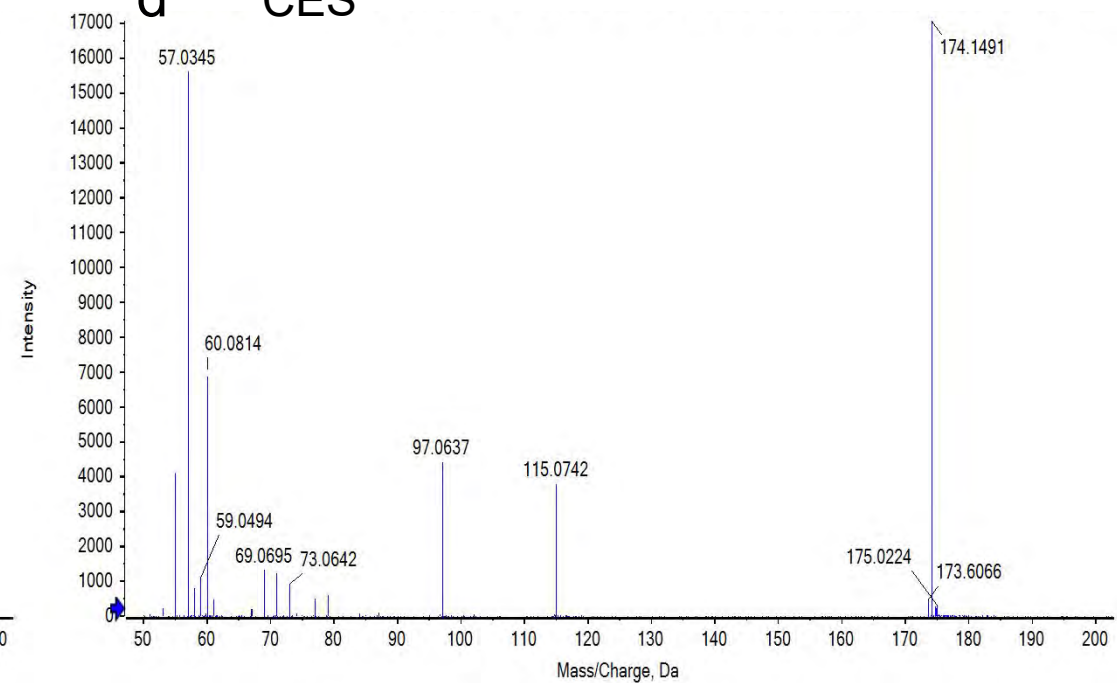

# 5. Domoic acid

**a** 20 eV

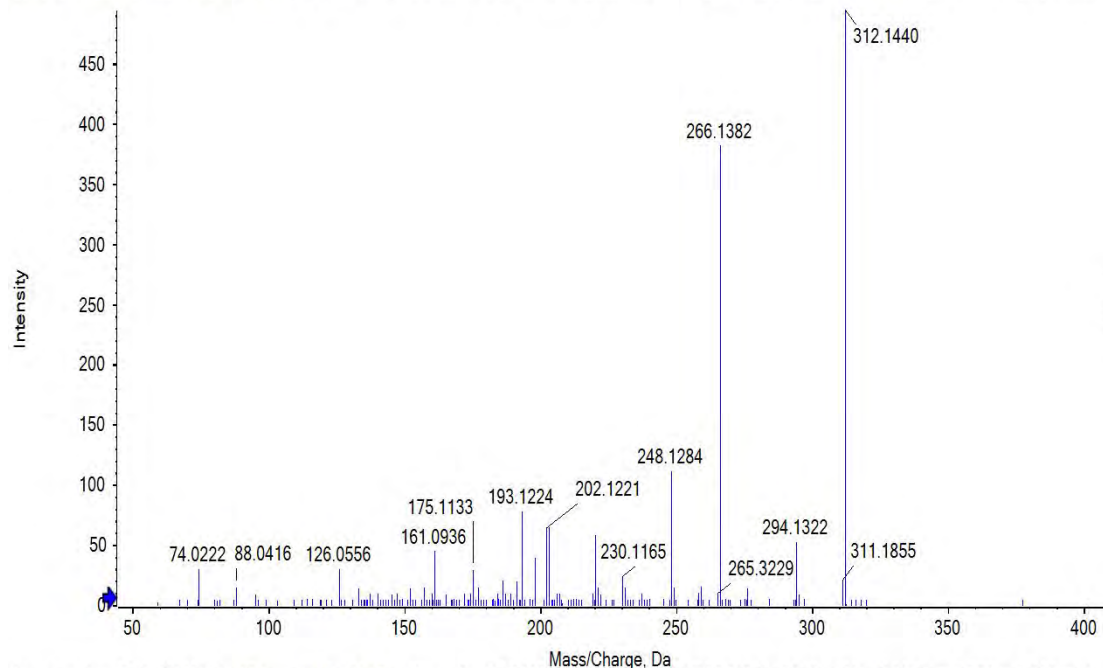

**b** 35eV

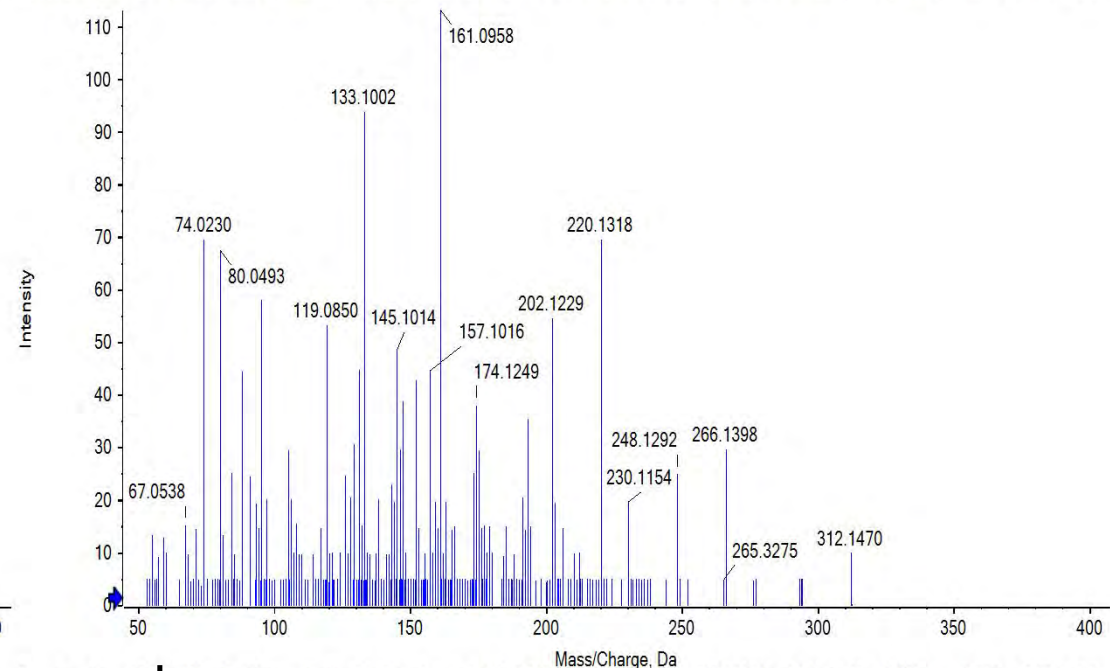

**c** 50 eV

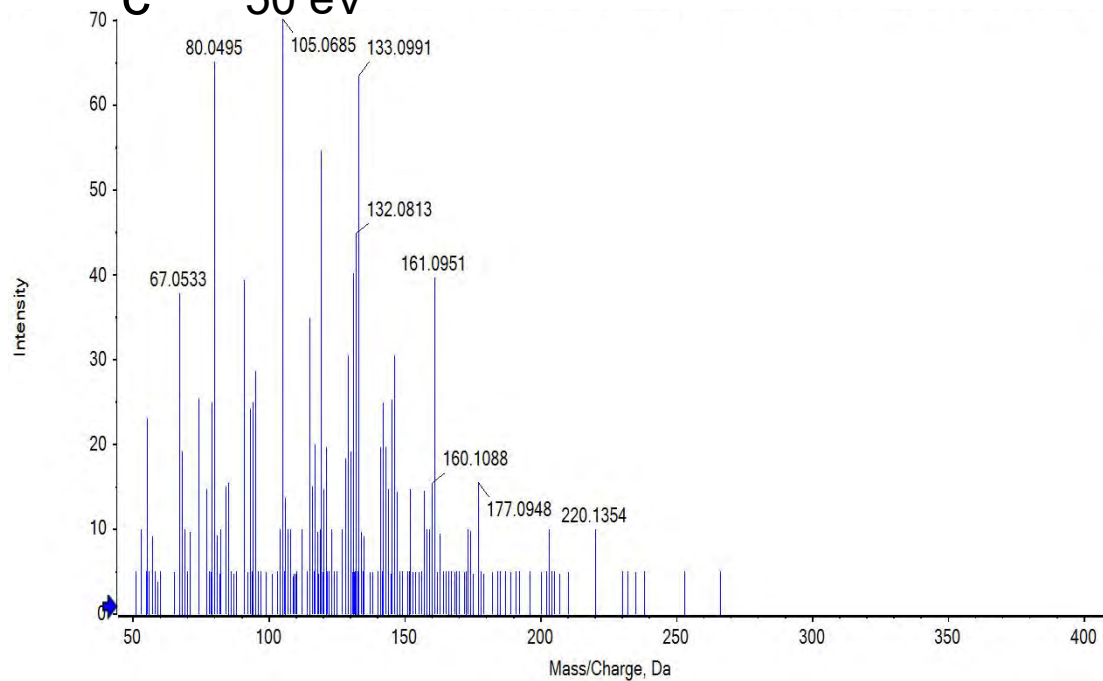

**d** CES

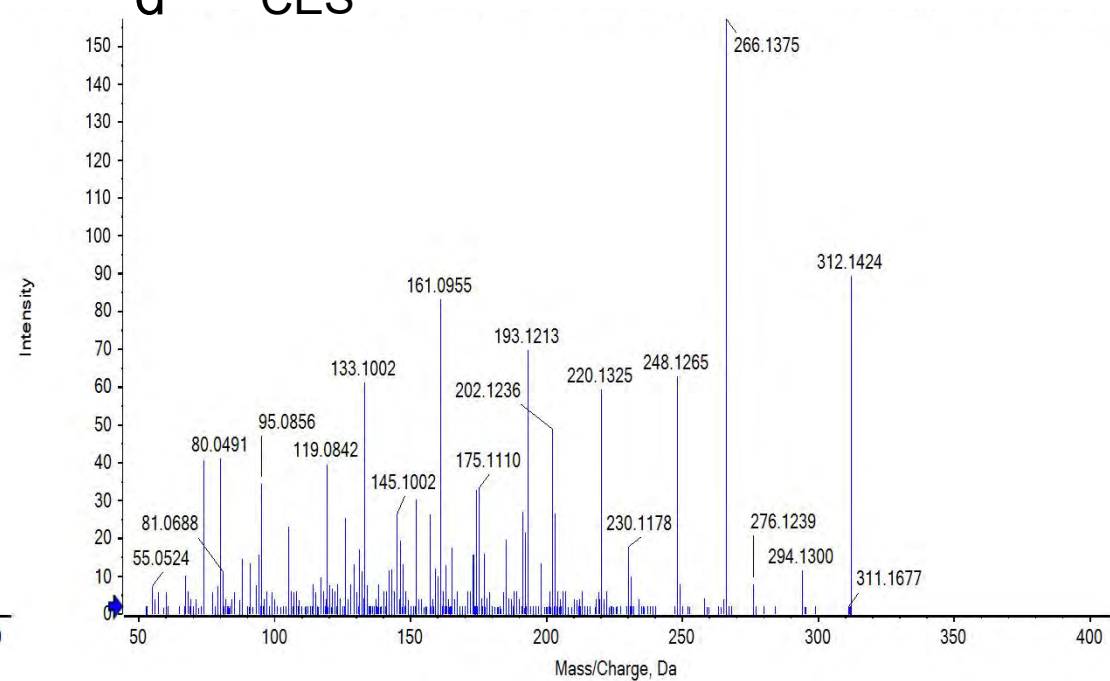

# 6. Bufotenine

**a** 20 eV

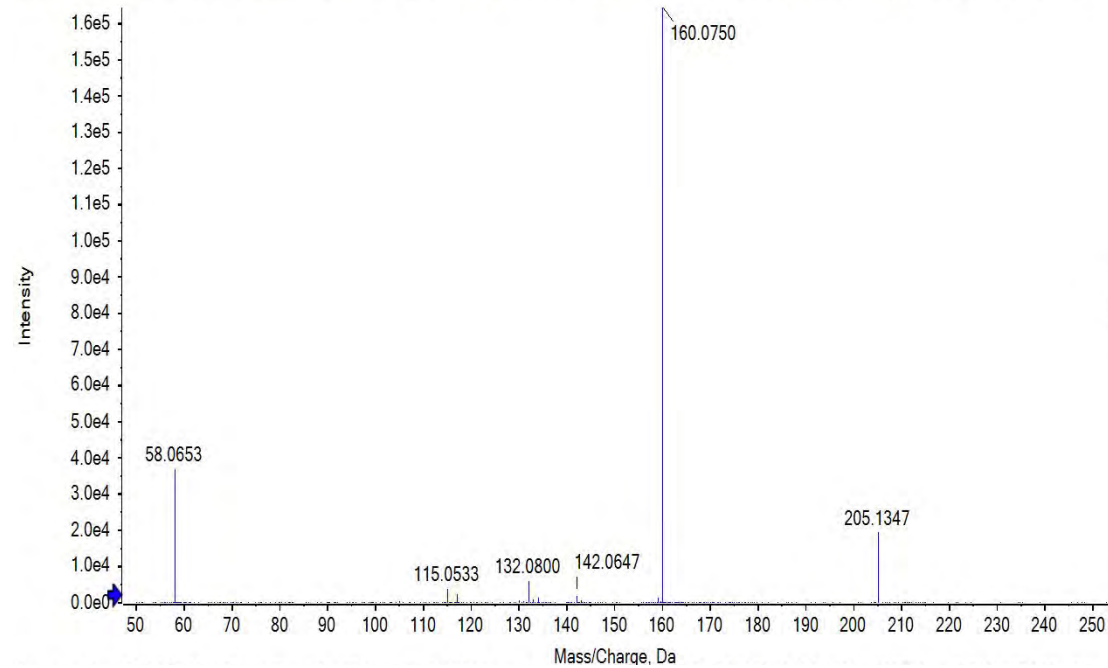

**b** 35eV

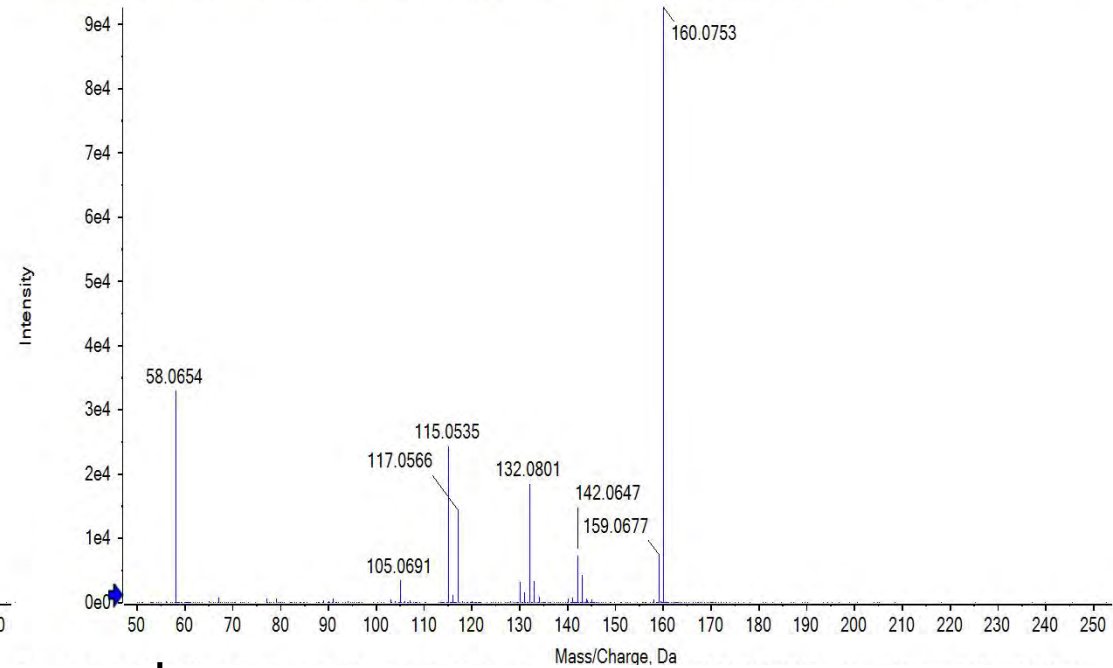

**c** 50 eV

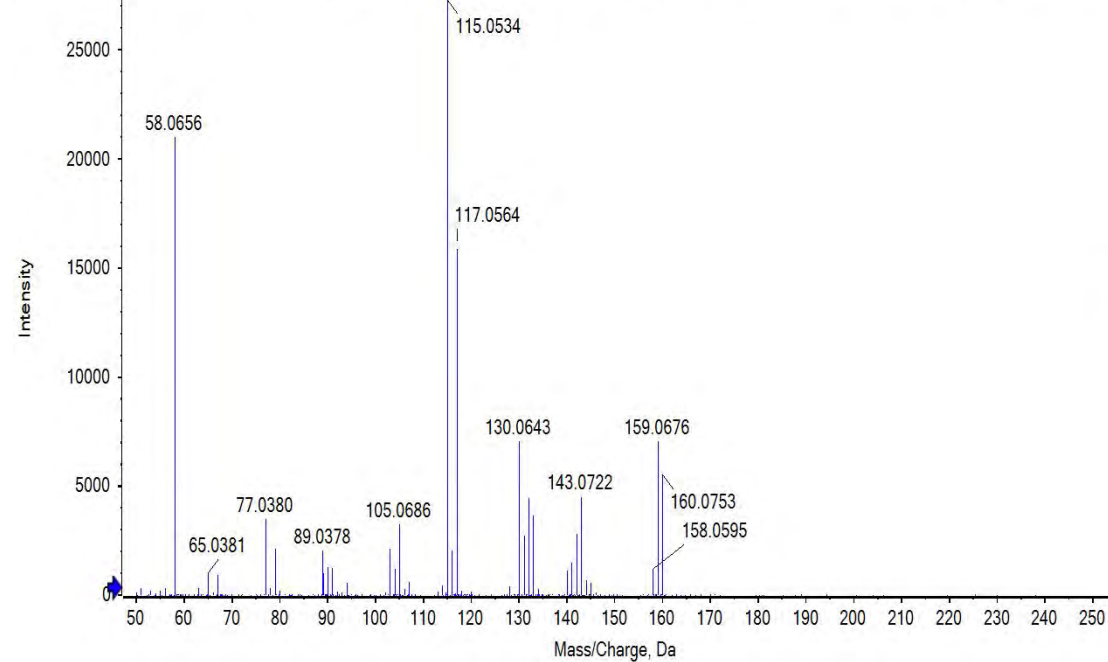

**d** CES

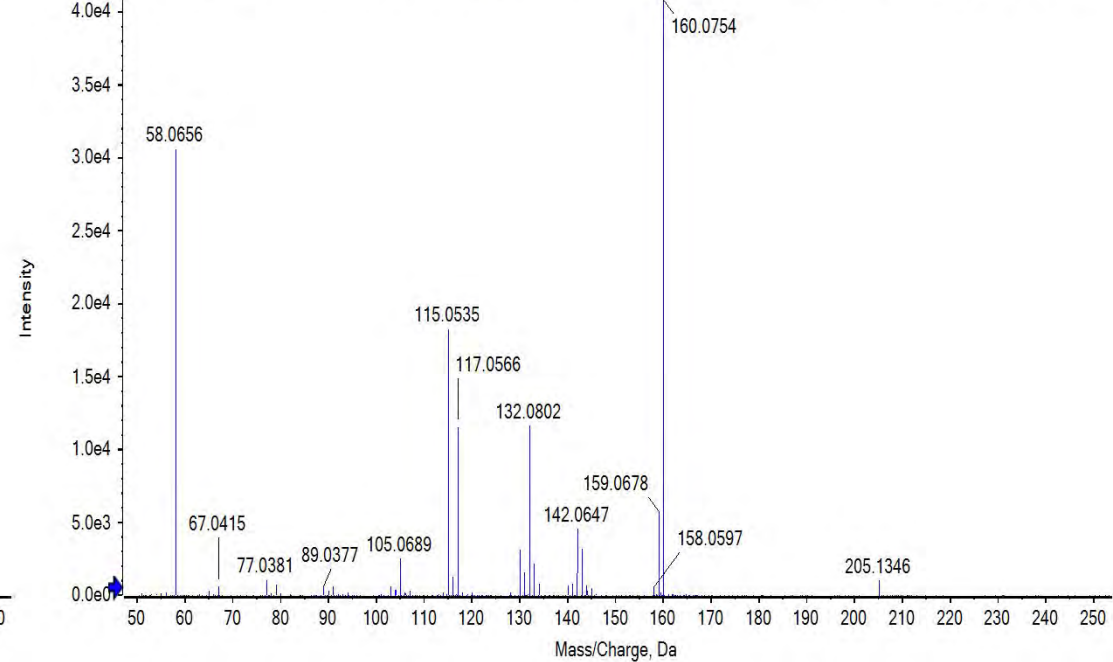

# 7. Amygdalin

**a** 20 eV

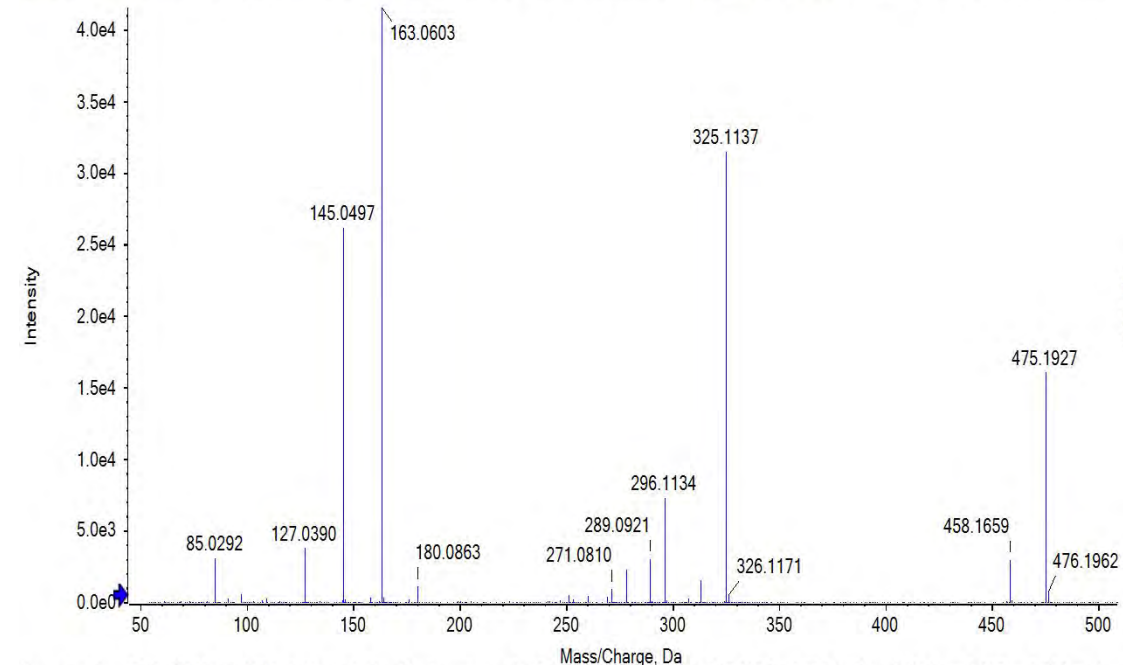

**b** 35eV

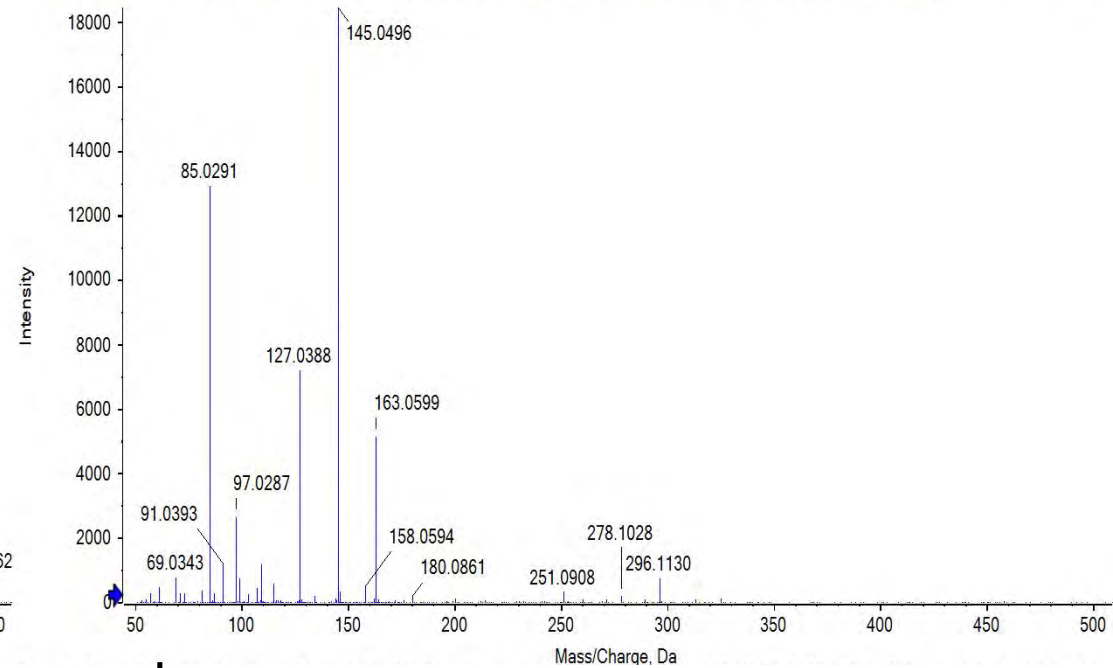

**c** 50 eV

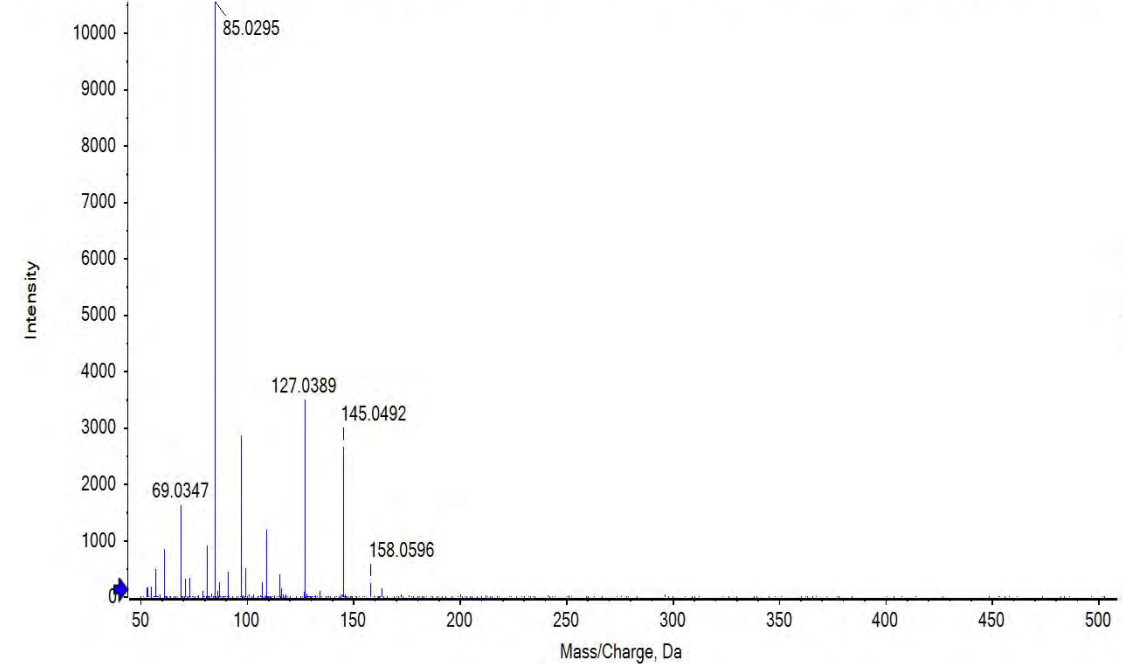

**d** CES

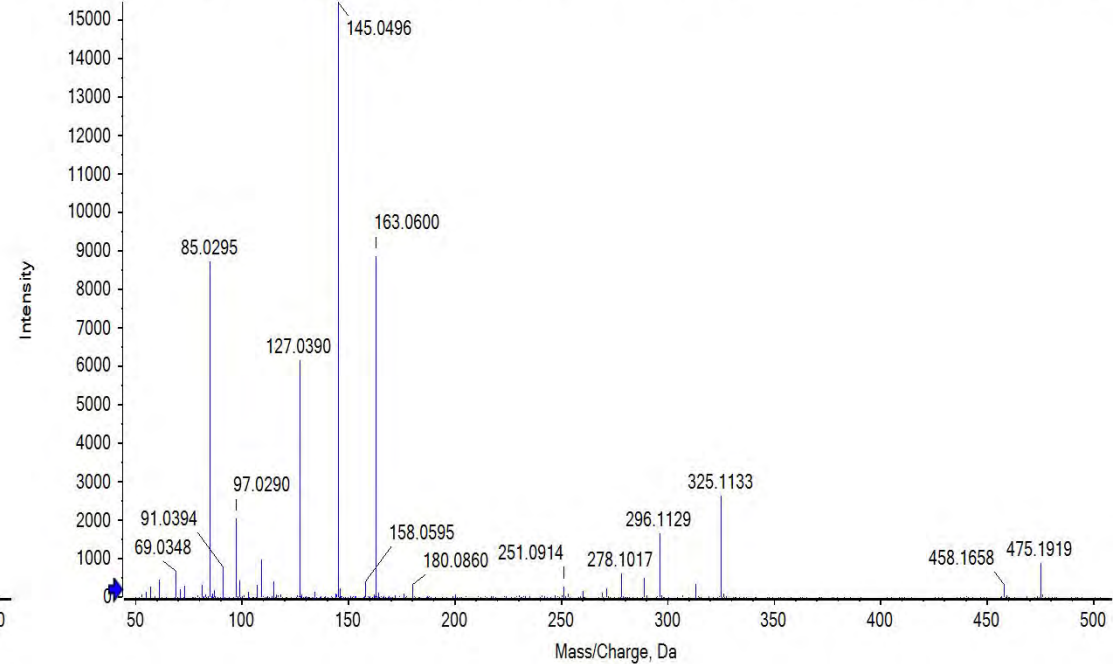

# 8. Coniine

**a** 20 eV

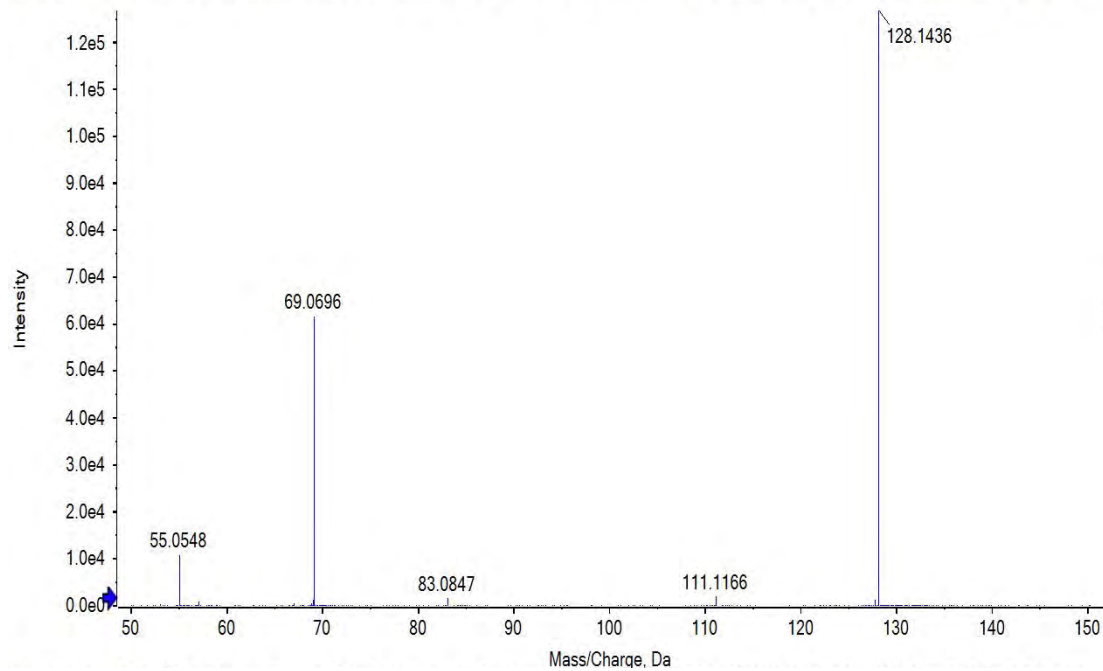

**b** 35eV

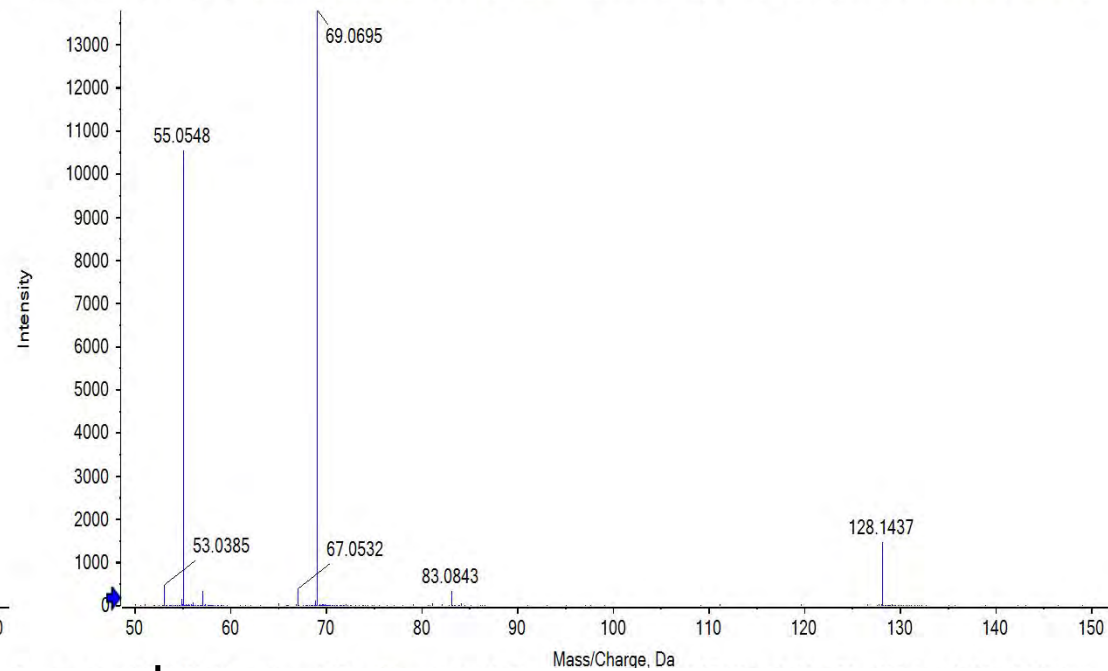

**c** 50 eV

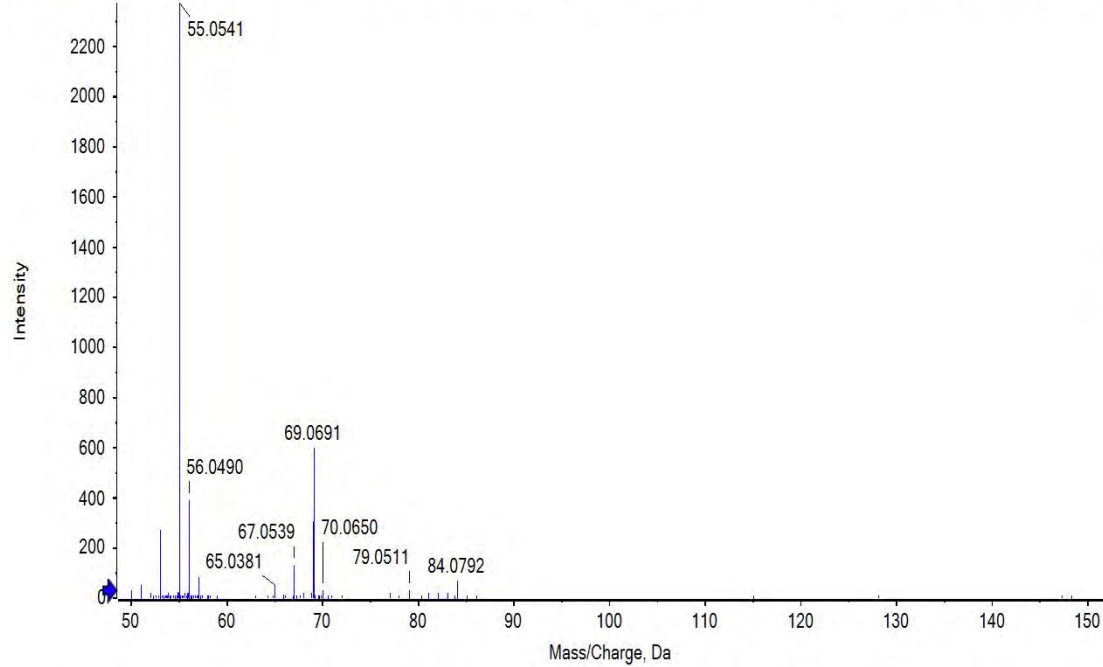

**d** CES

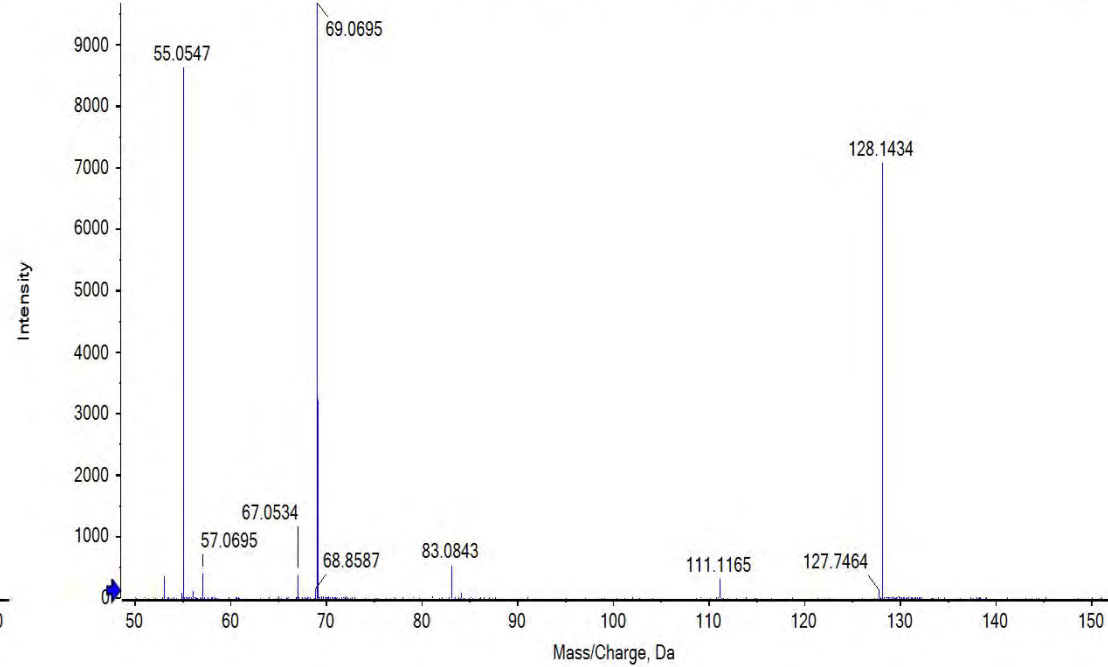



# 9. Aconine

**a** 20 eV

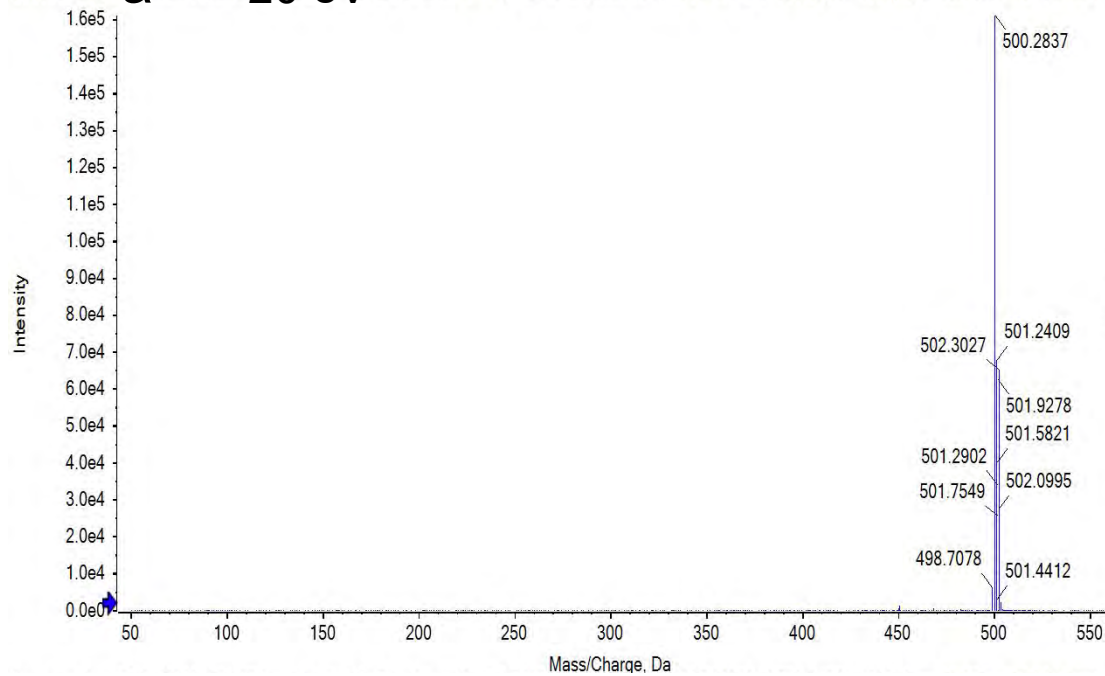

**b** 35eV

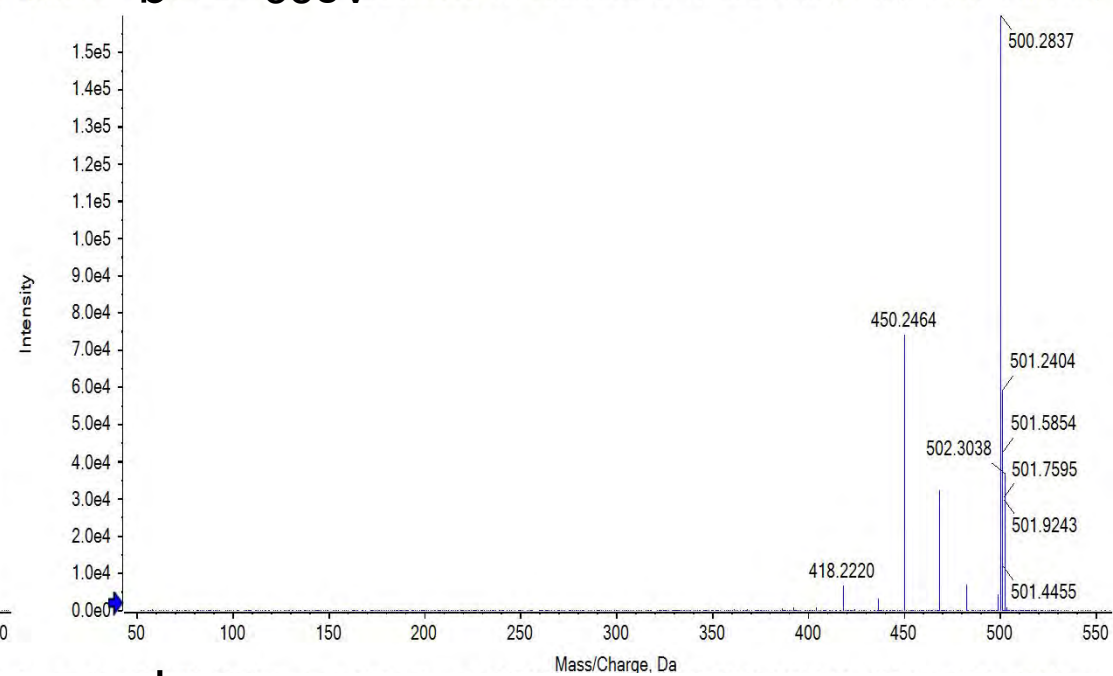

**c** 50 eV

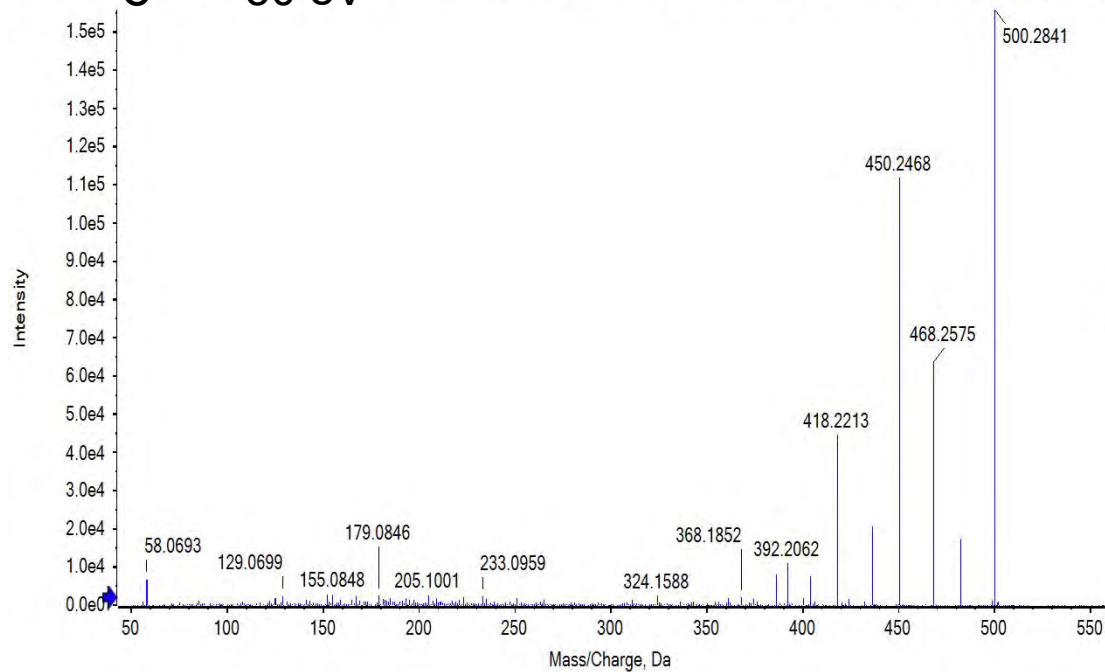

**d** CES

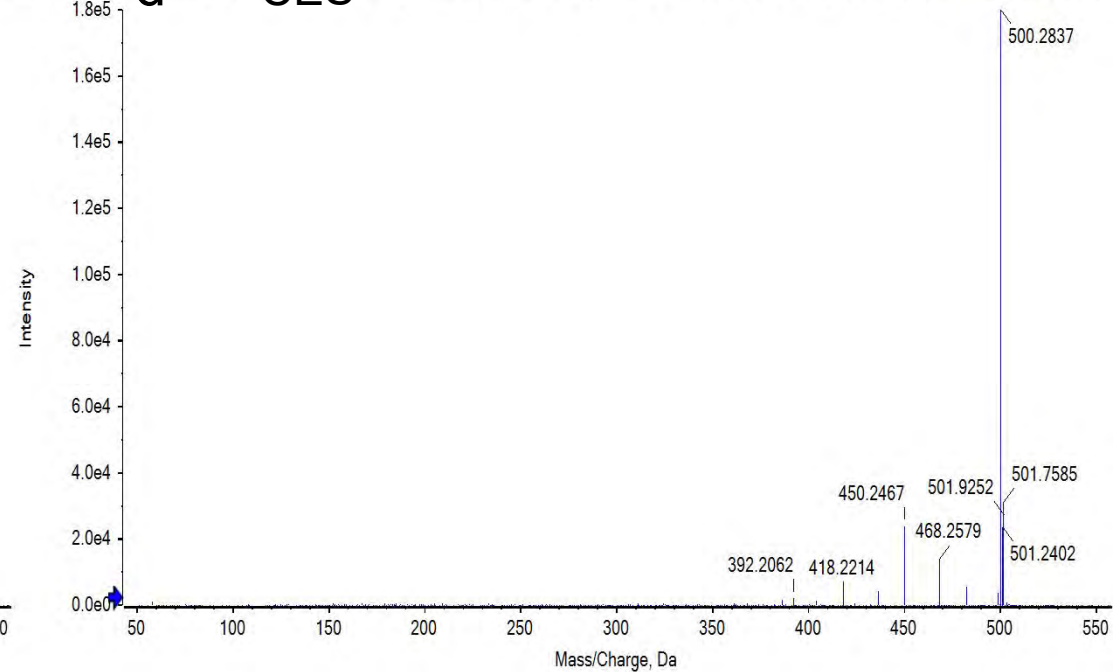

# 10. Lycorine

**a** 20 eV

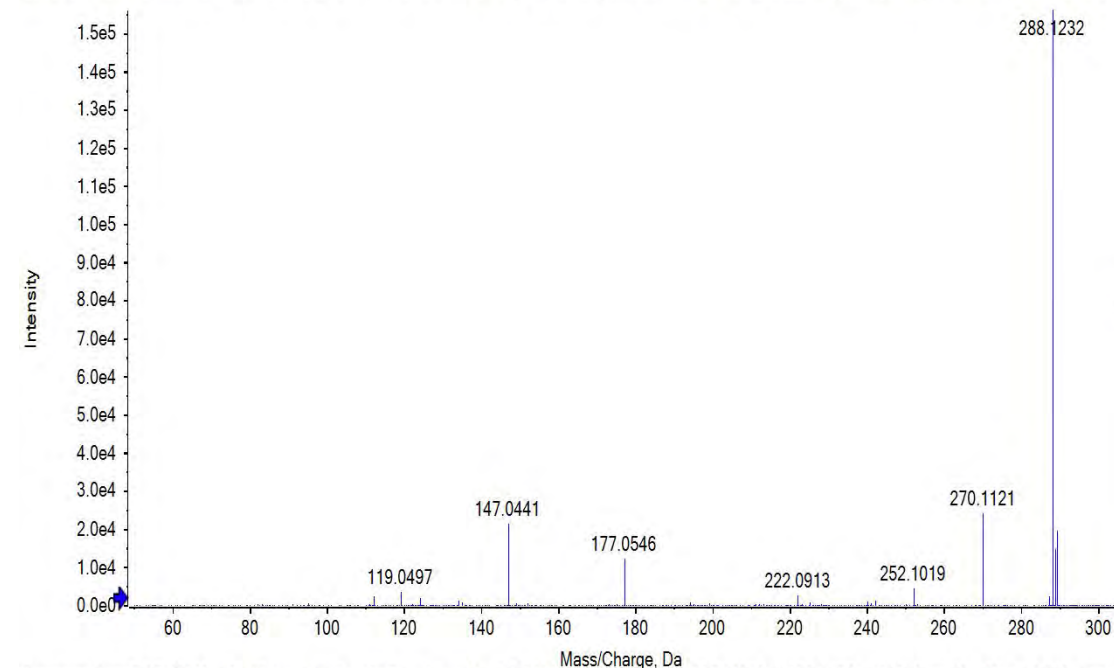

**b** 35eV

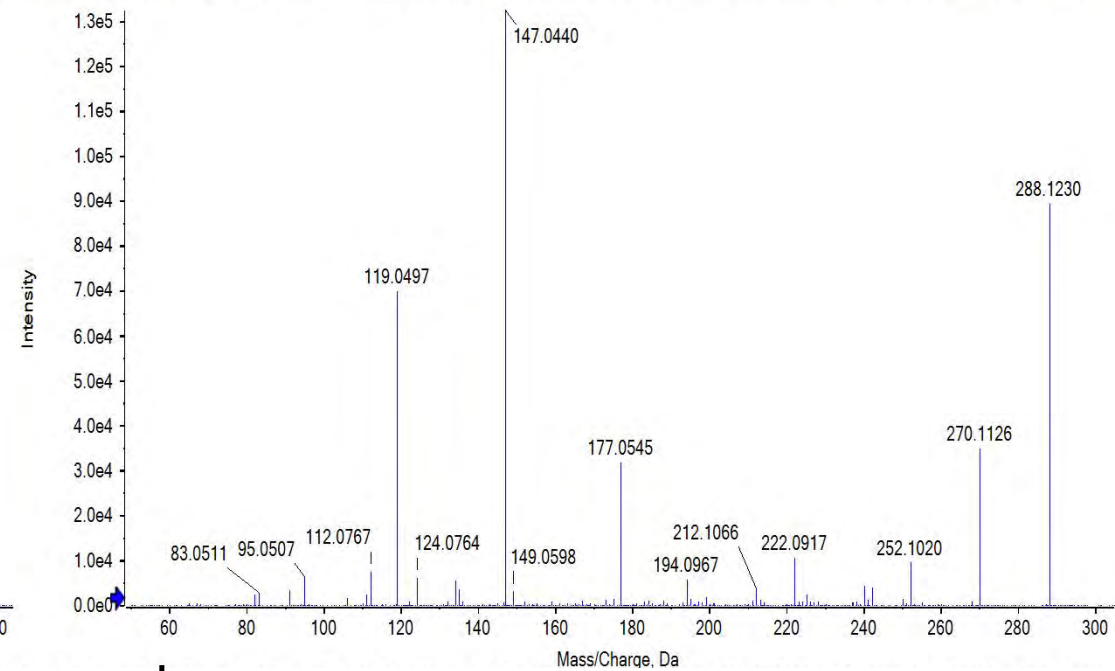

**c** 50 eV

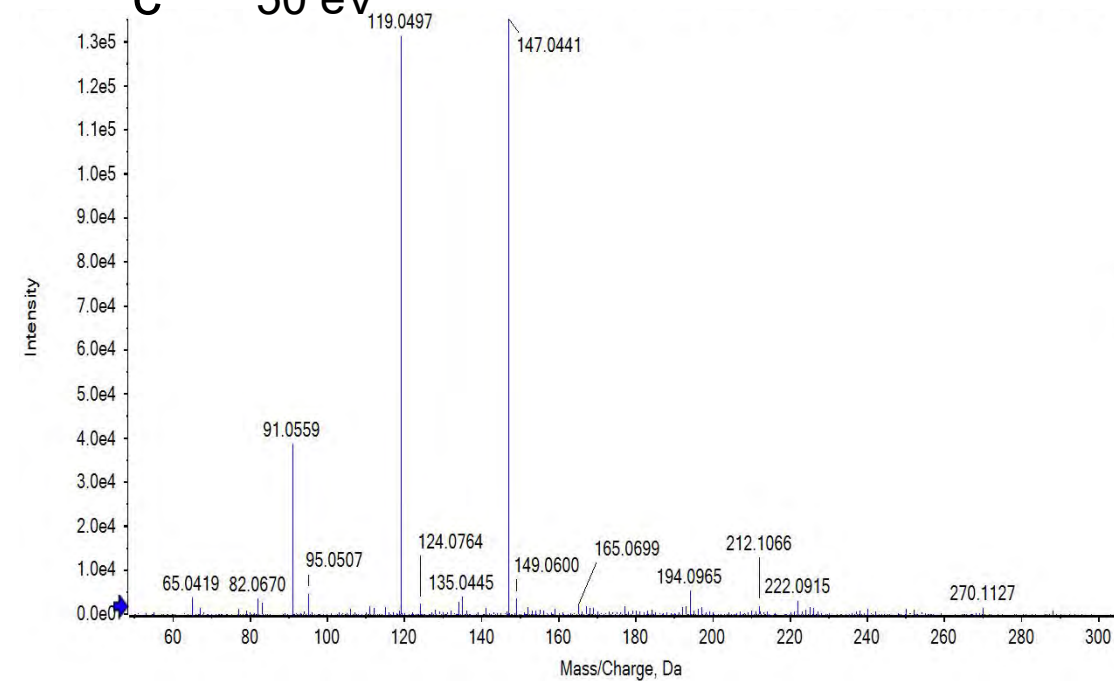

**d** CES

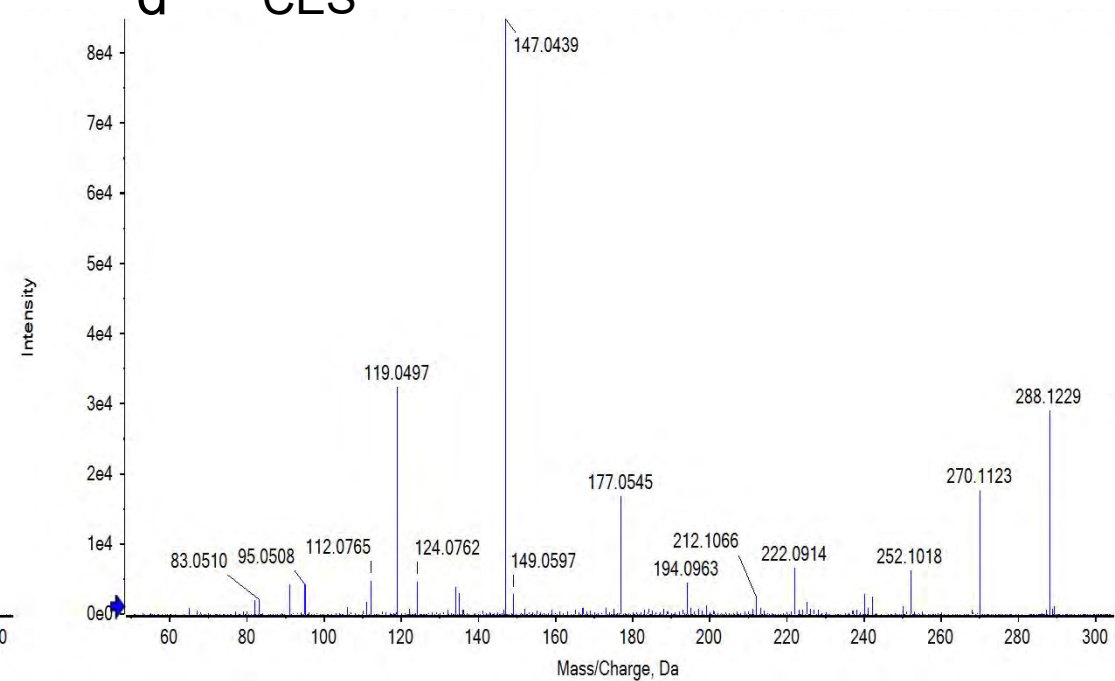

# 11. Galantamine

**a** 20 eV

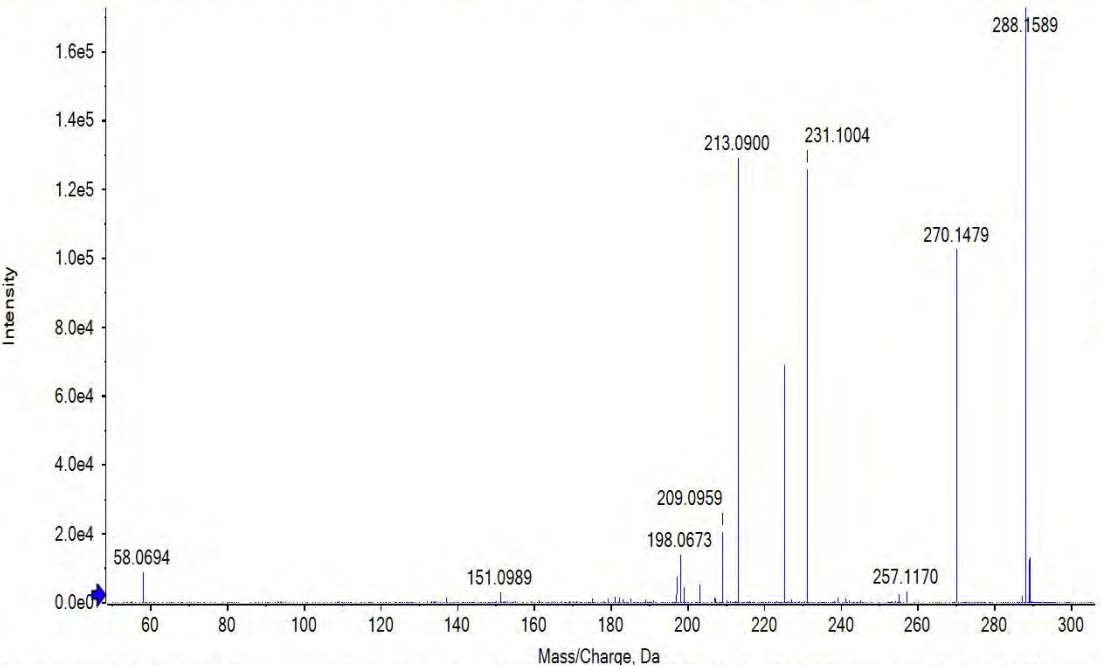

**b** 35eV

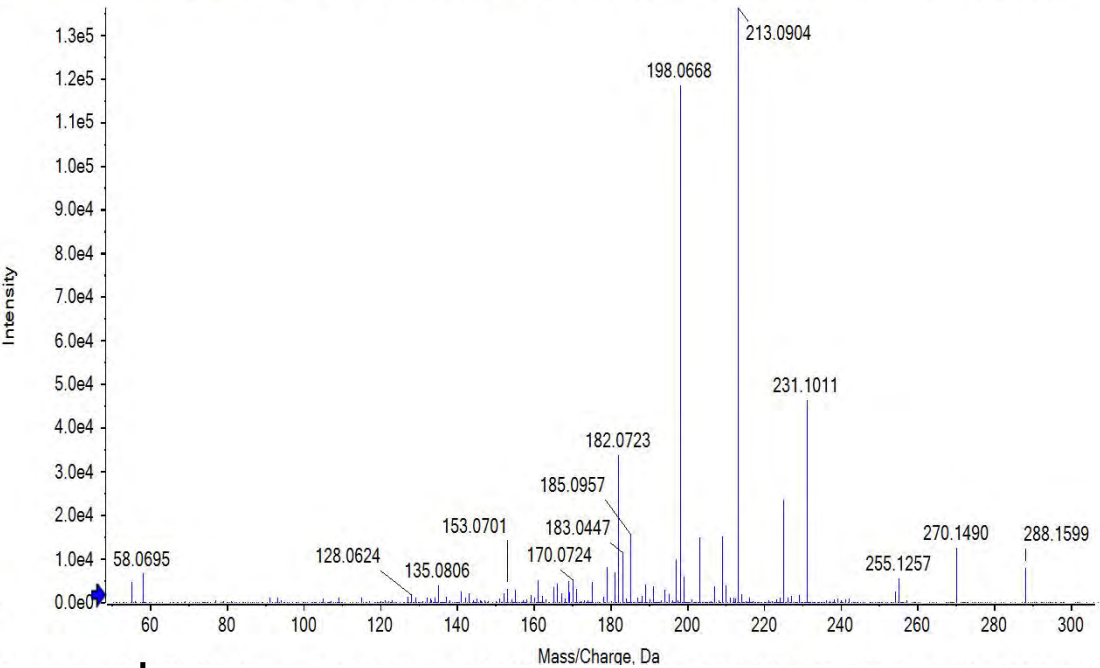

**c** 50 eV

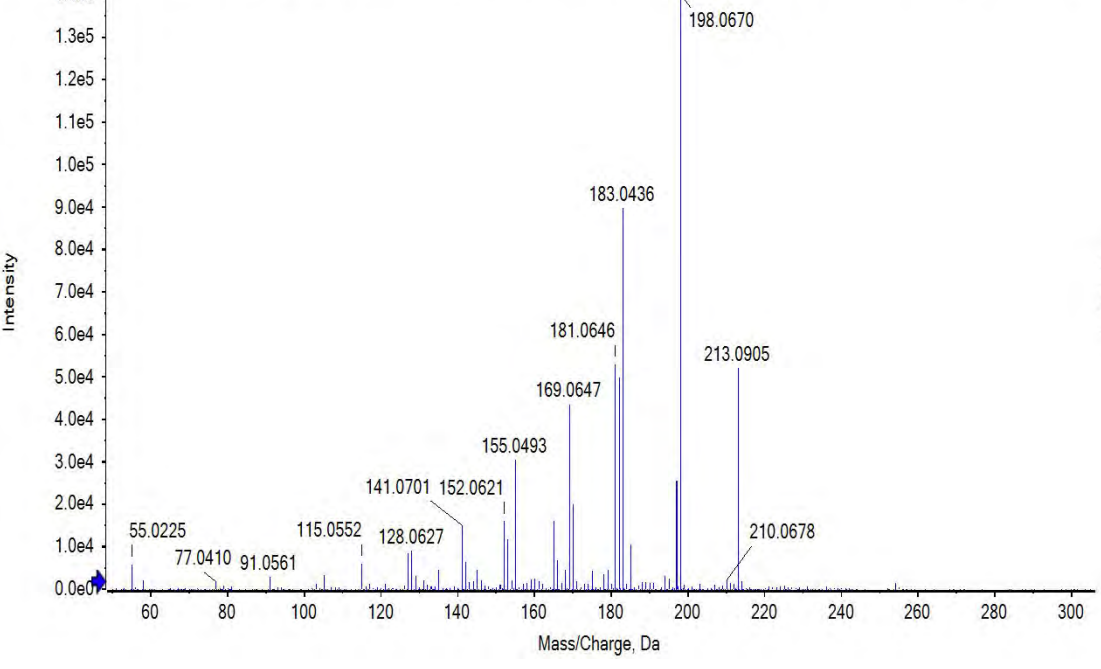

**d** CES

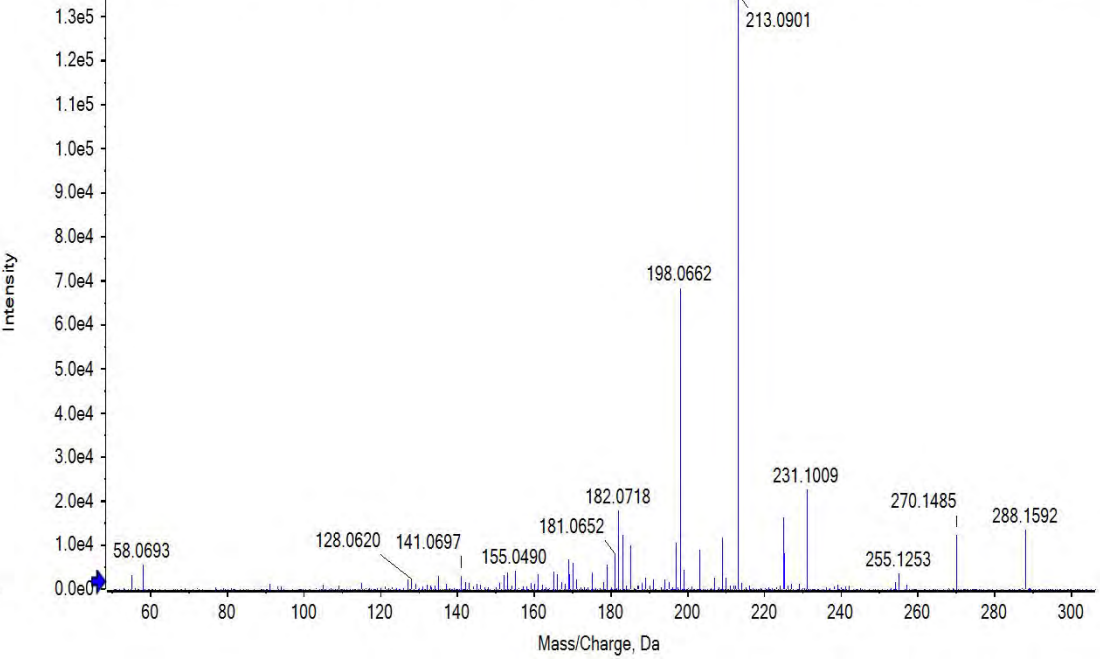

# 12. $\alpha$ -Amanitin

**a** 20 eV

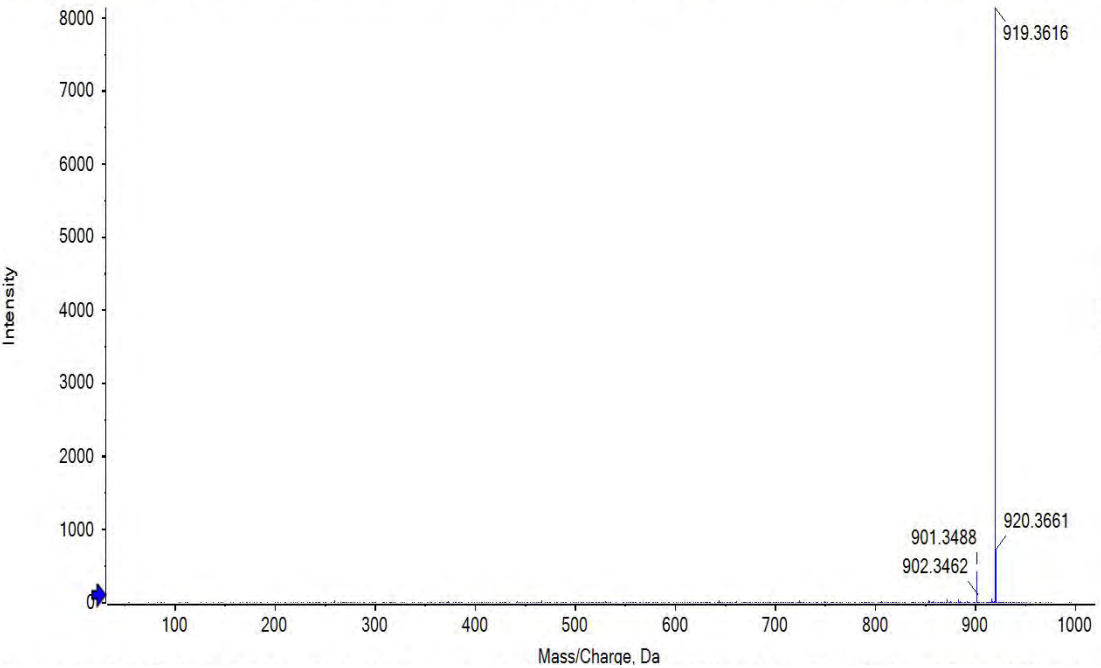

**b** 35eV

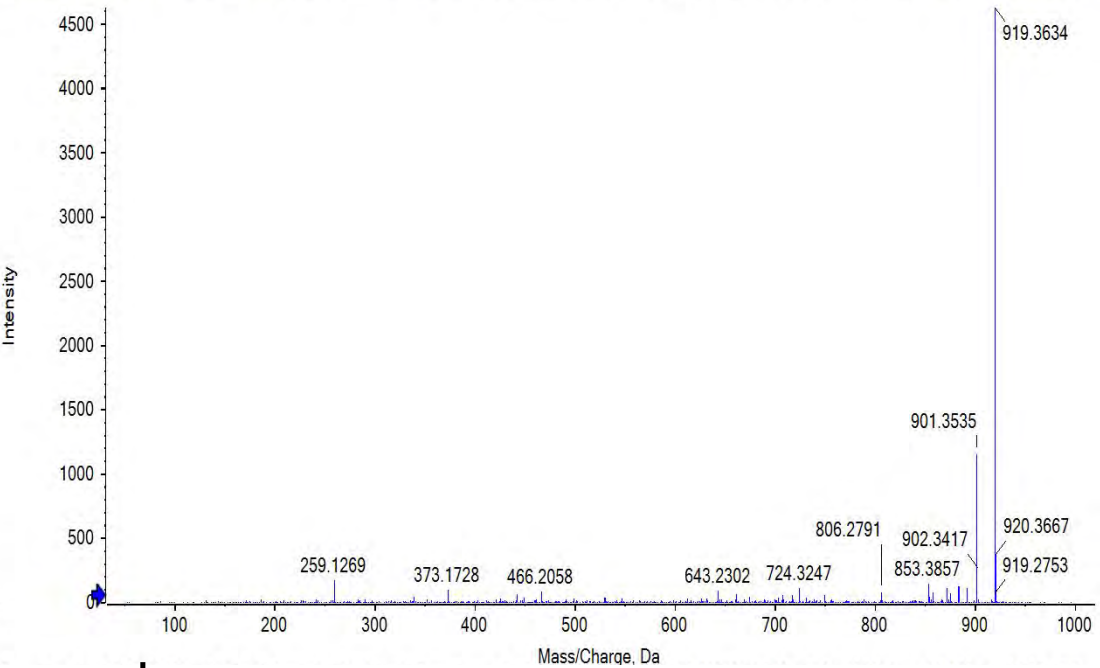

**c** 50 eV

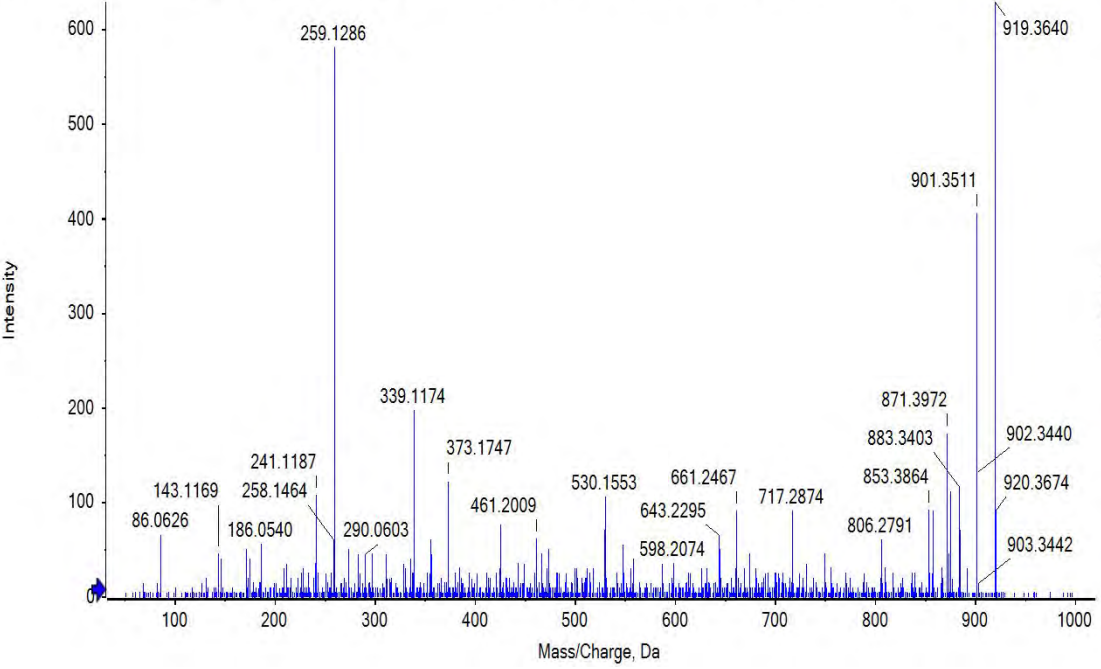

**d** CES

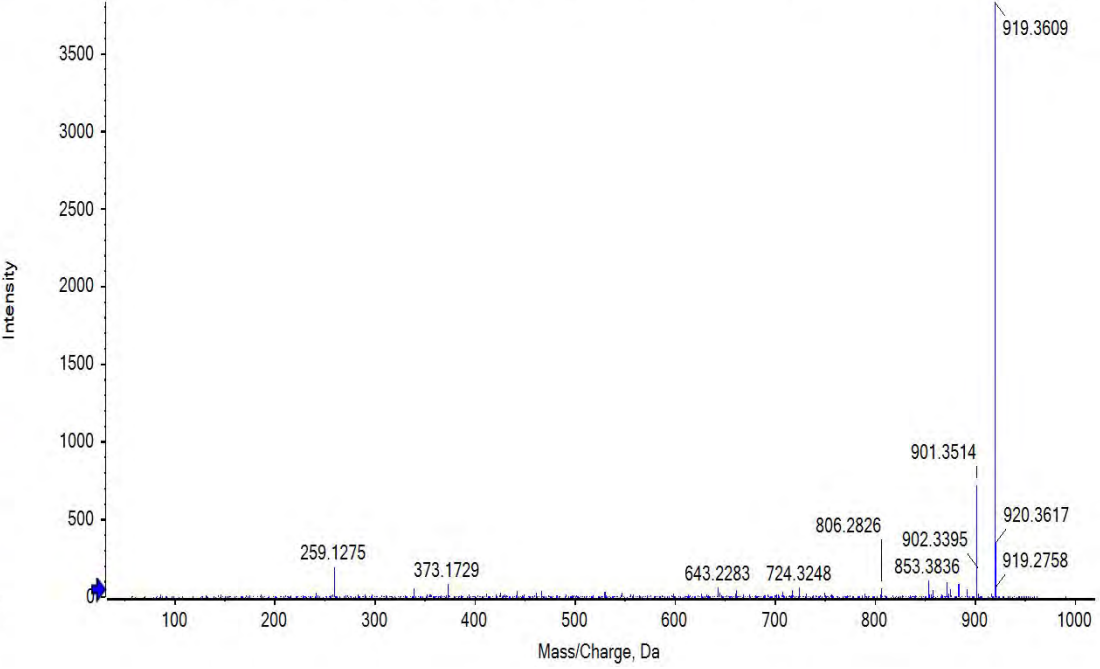

# 13. $\beta$ -Amanitin

**a** 20 eV

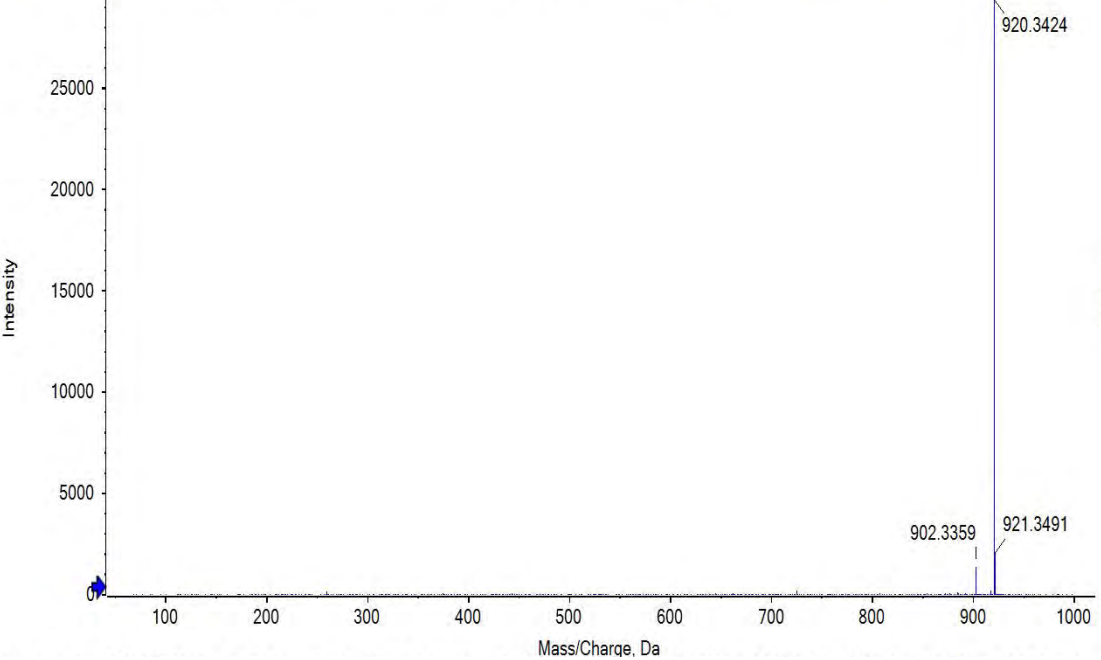

**b** 35eV

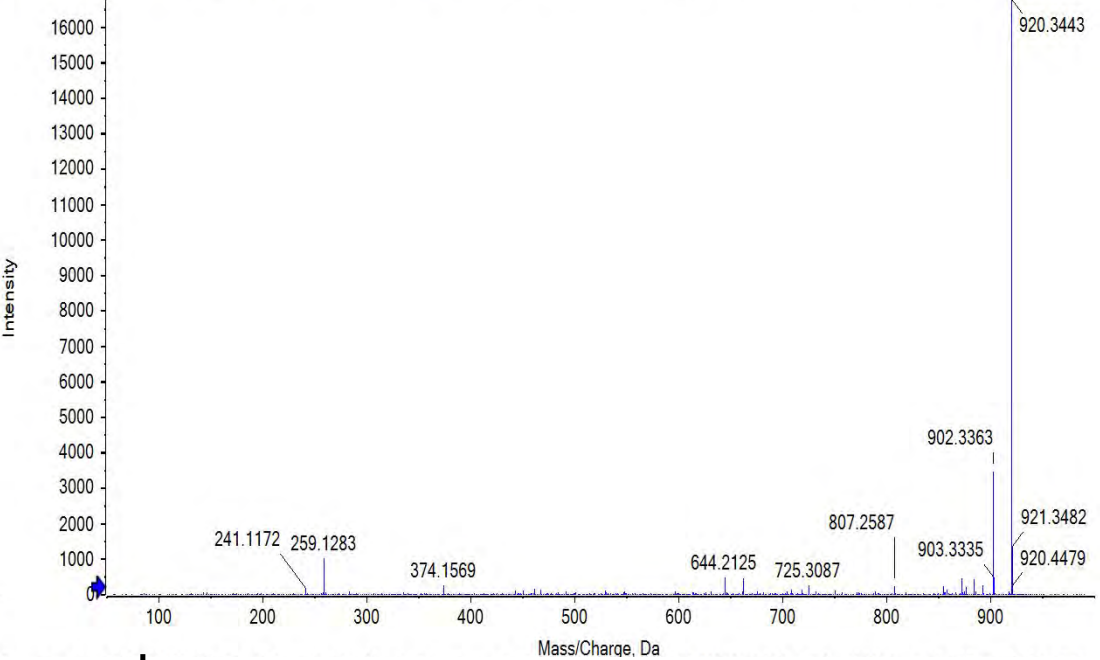

**c** 50 eV

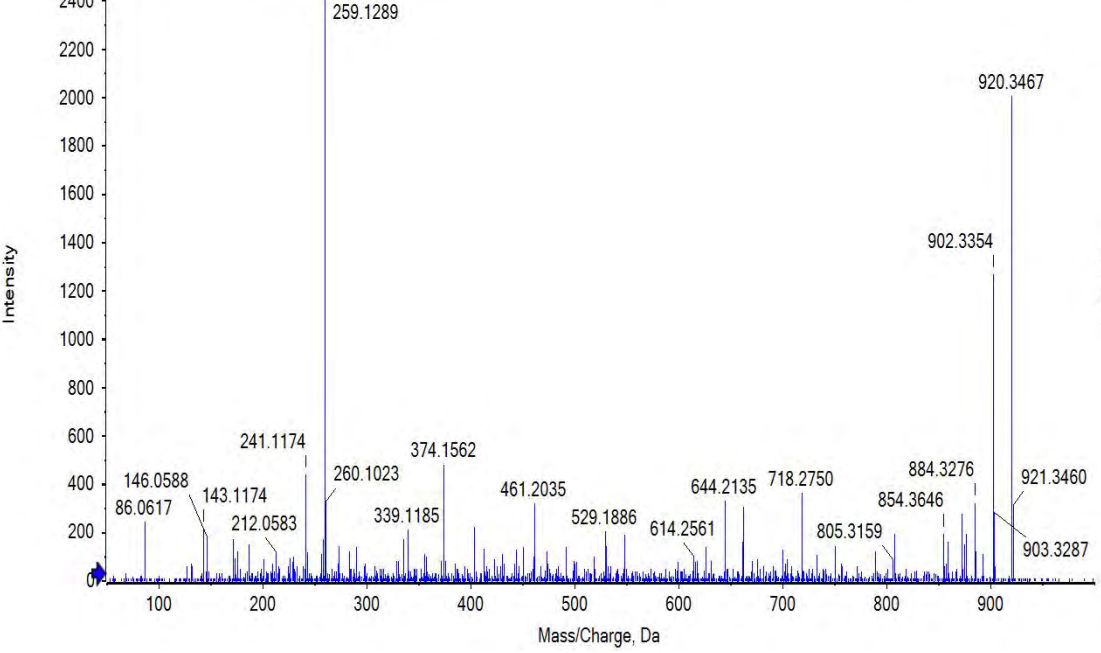

**d** CES

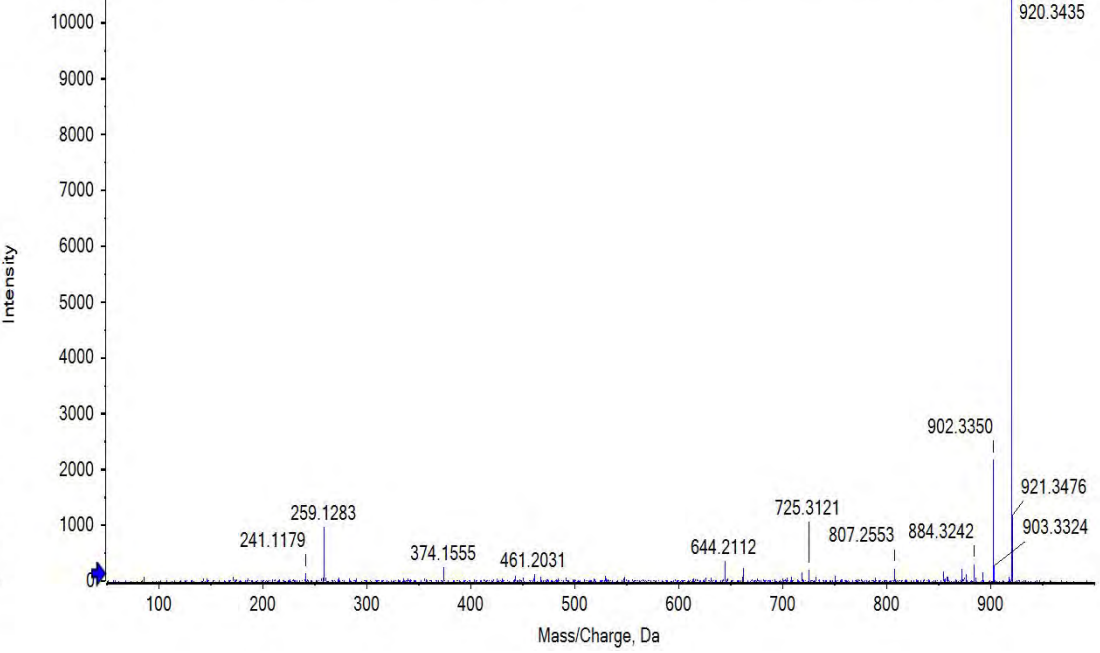

# 14. Atropine

**a** 20 eV

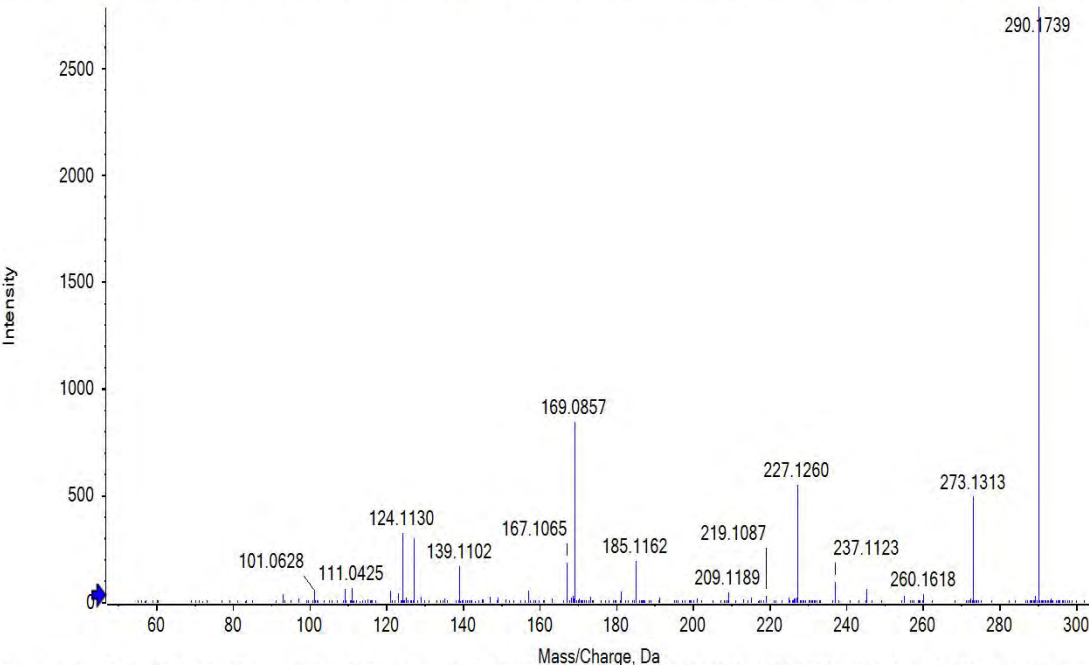

**b** 35eV

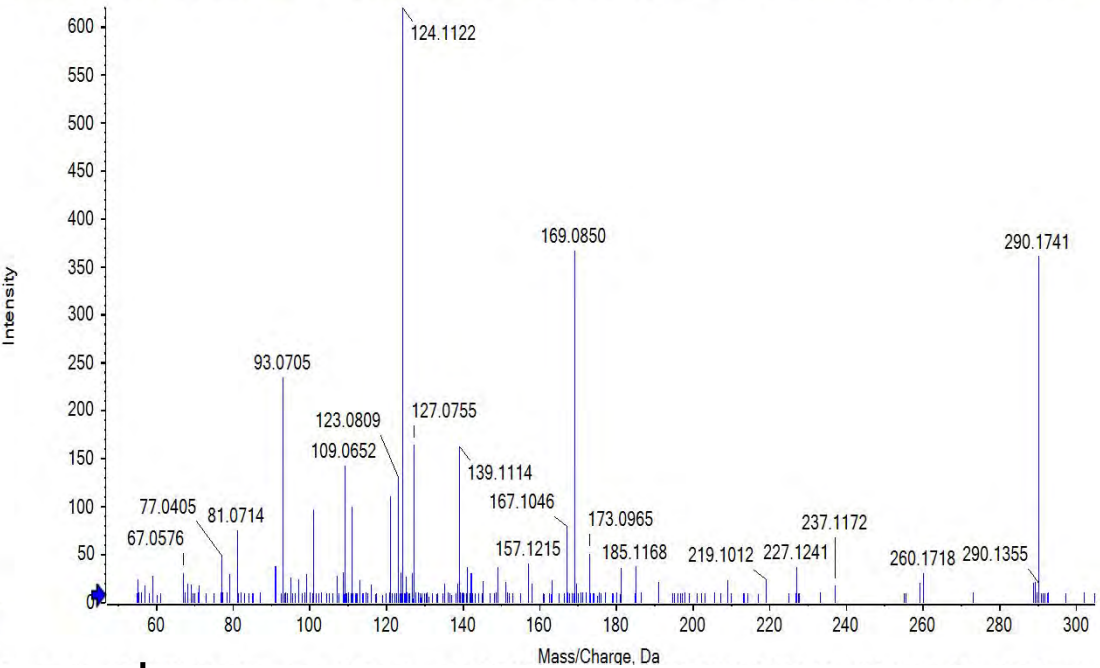

**c** 50 eV

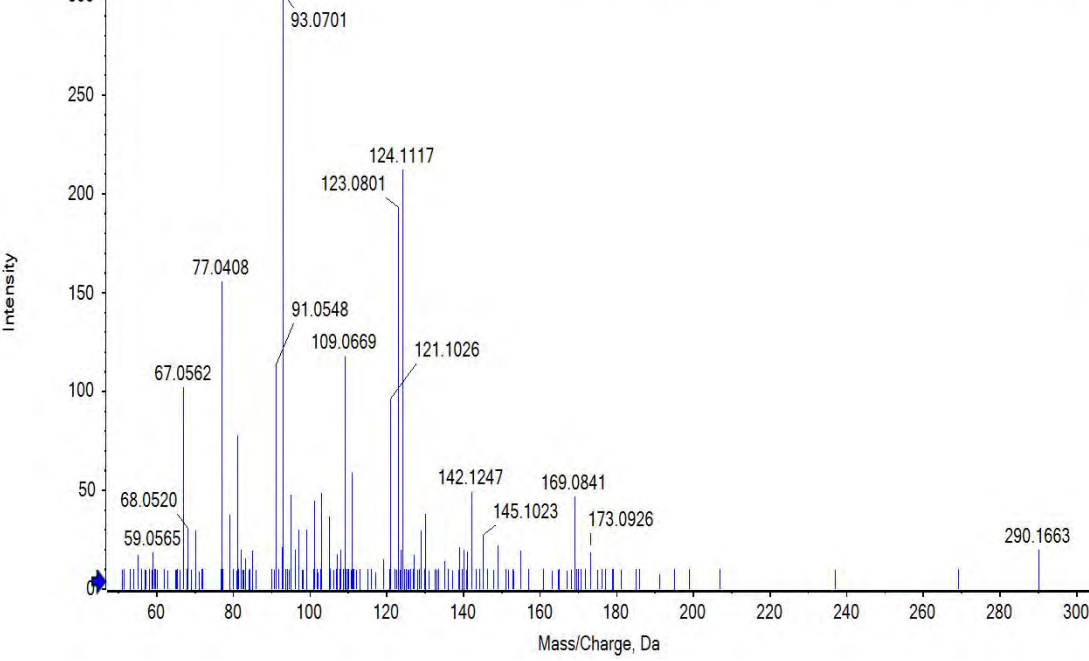

**d** CES

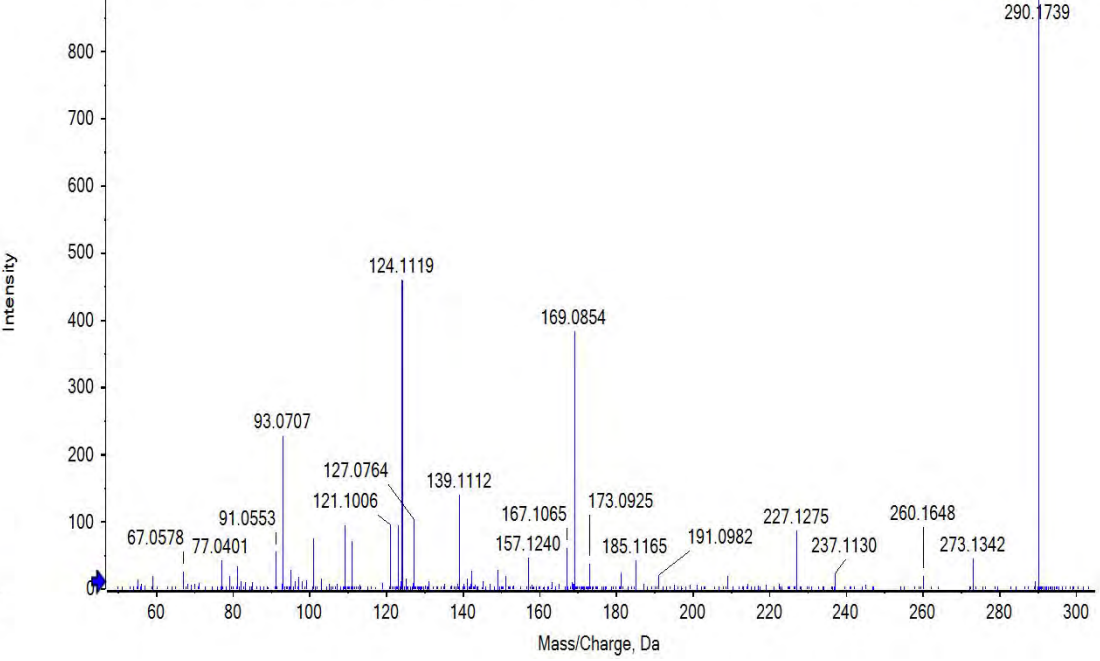

# 15. Tubocurarine

**a** 20 eV

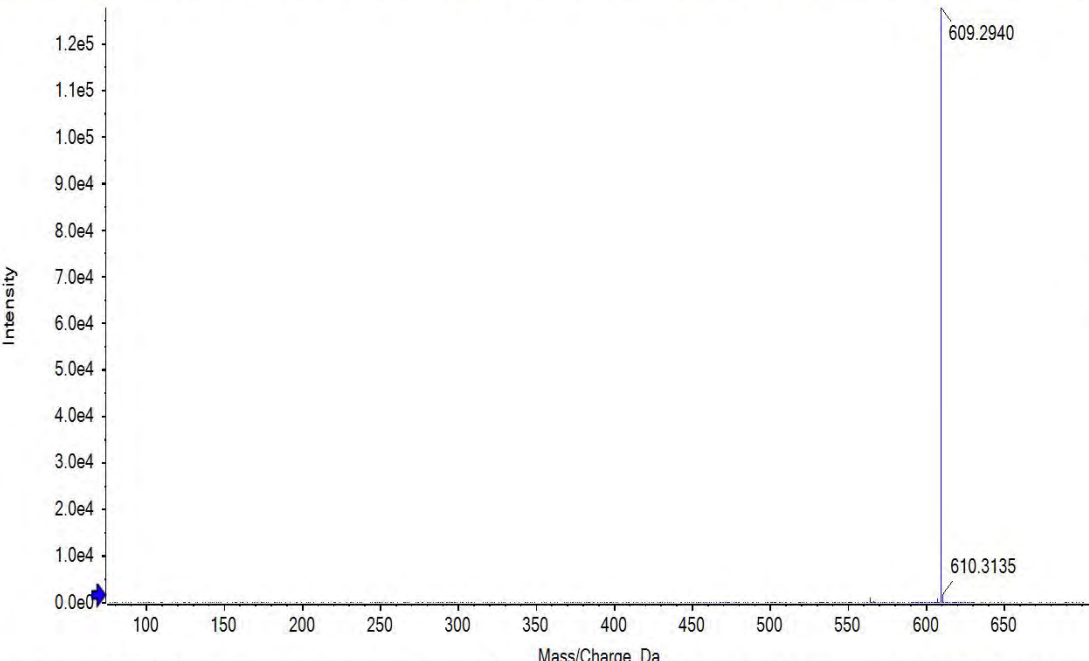

**b** 35eV

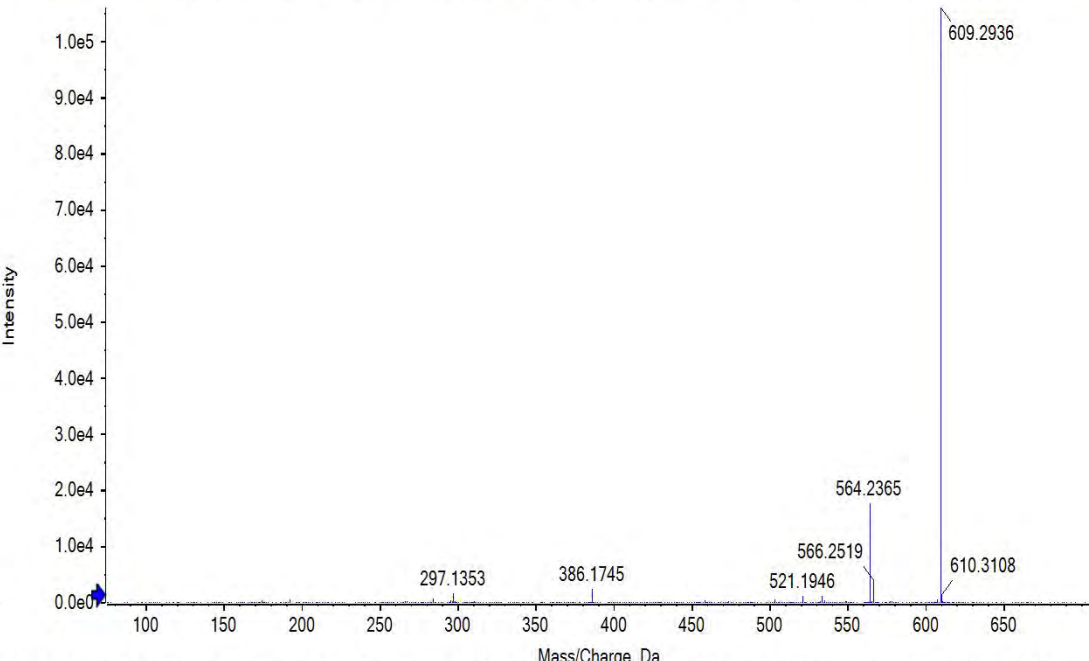

**c** 50 eV

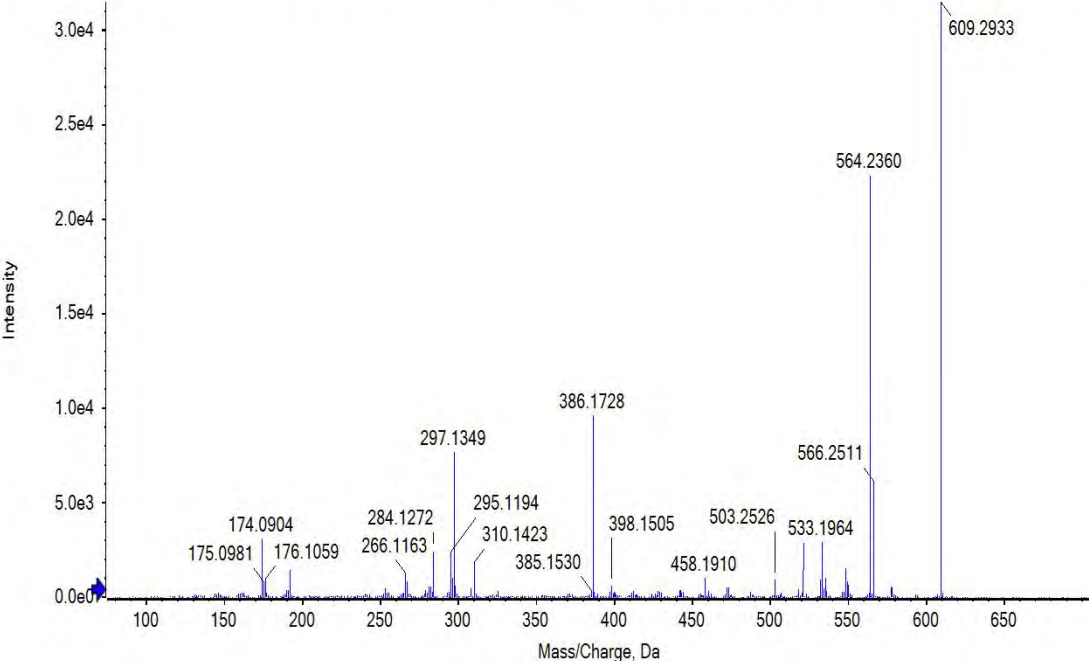

**d** CES

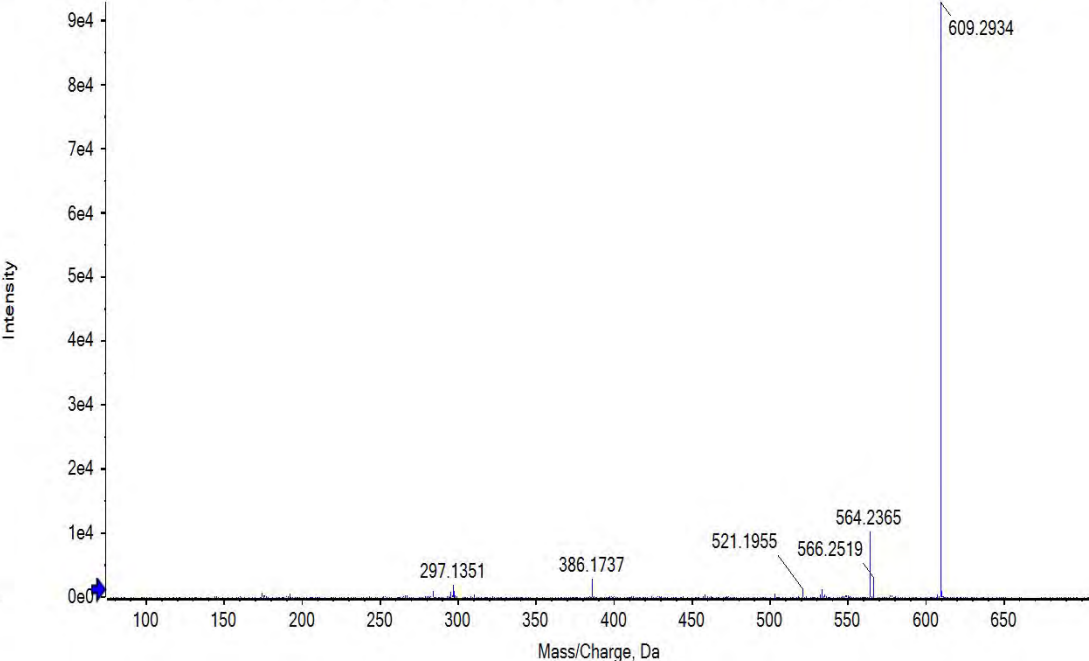

# 16. $\gamma$ -Amanitin

**a** 20 eV

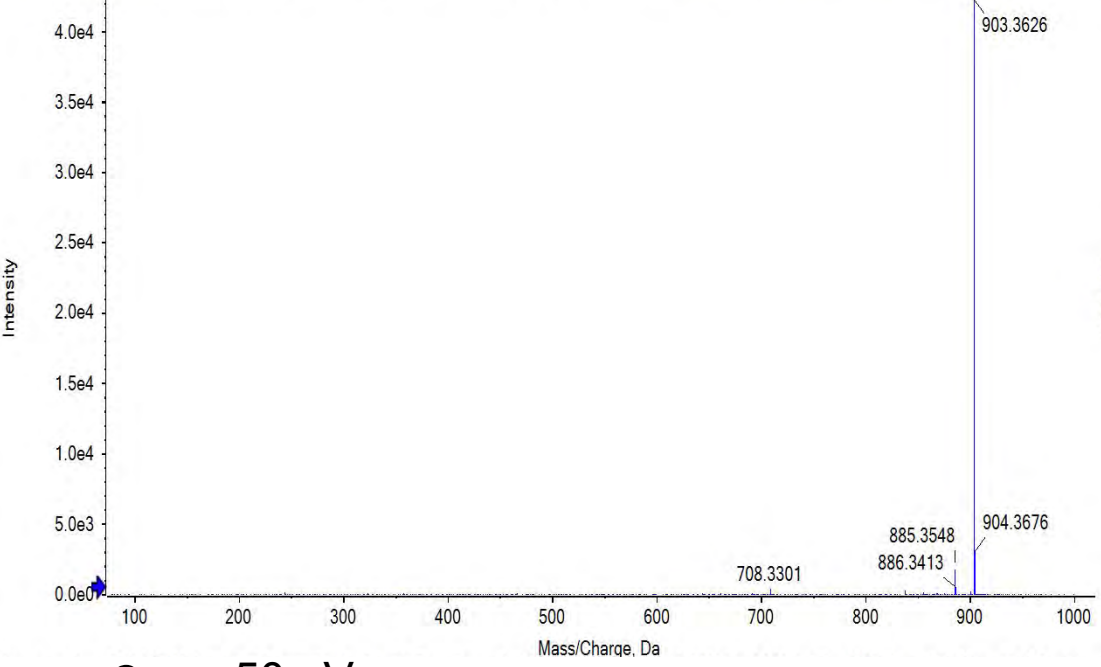

**b** 35eV

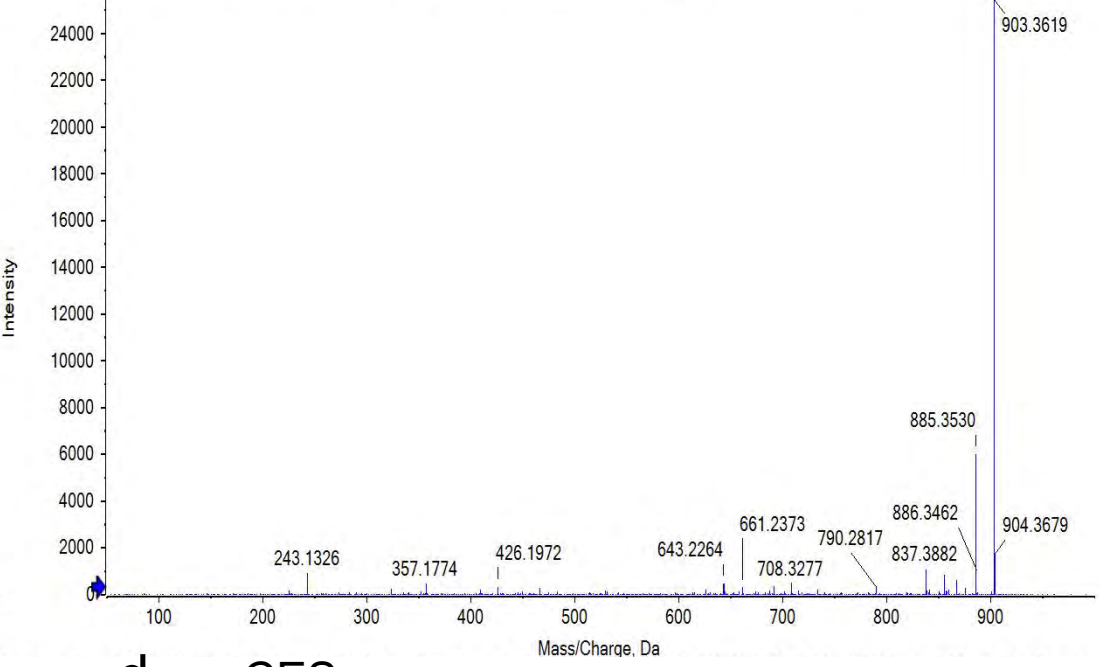

**c** 50 eV

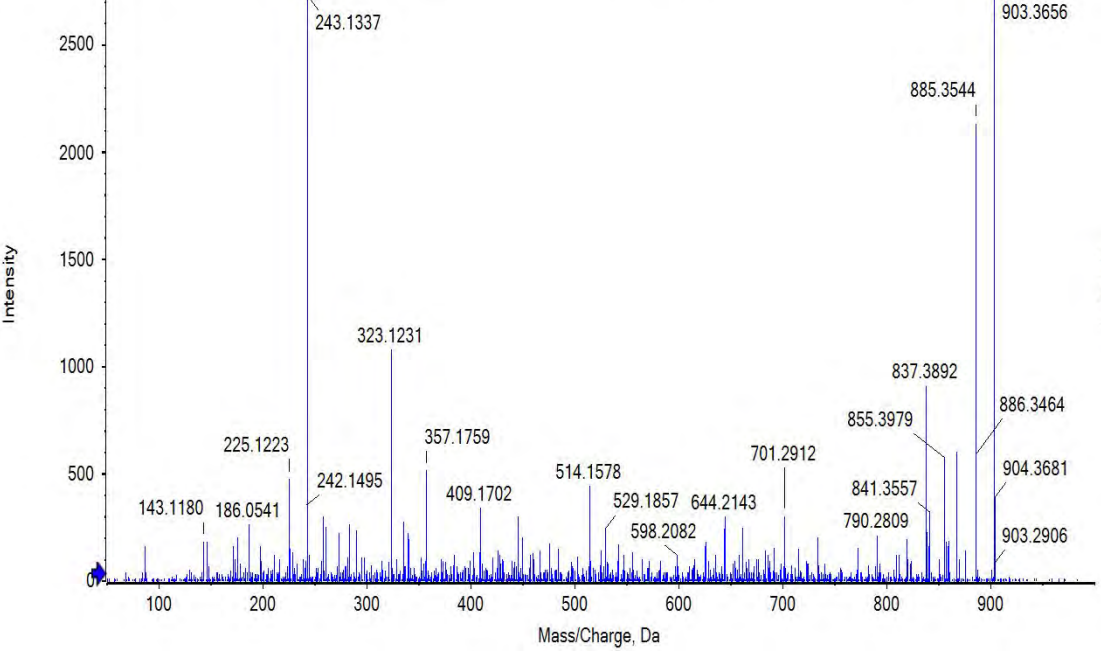

**d** CES

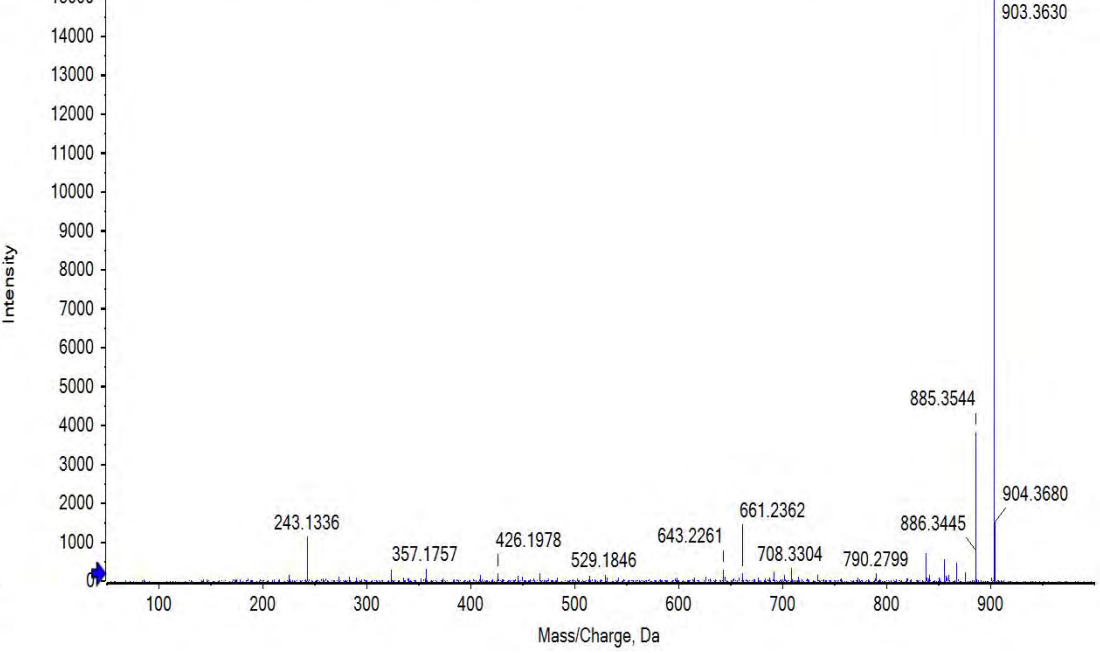



# 17. Scopolamine

**a** 20 eV

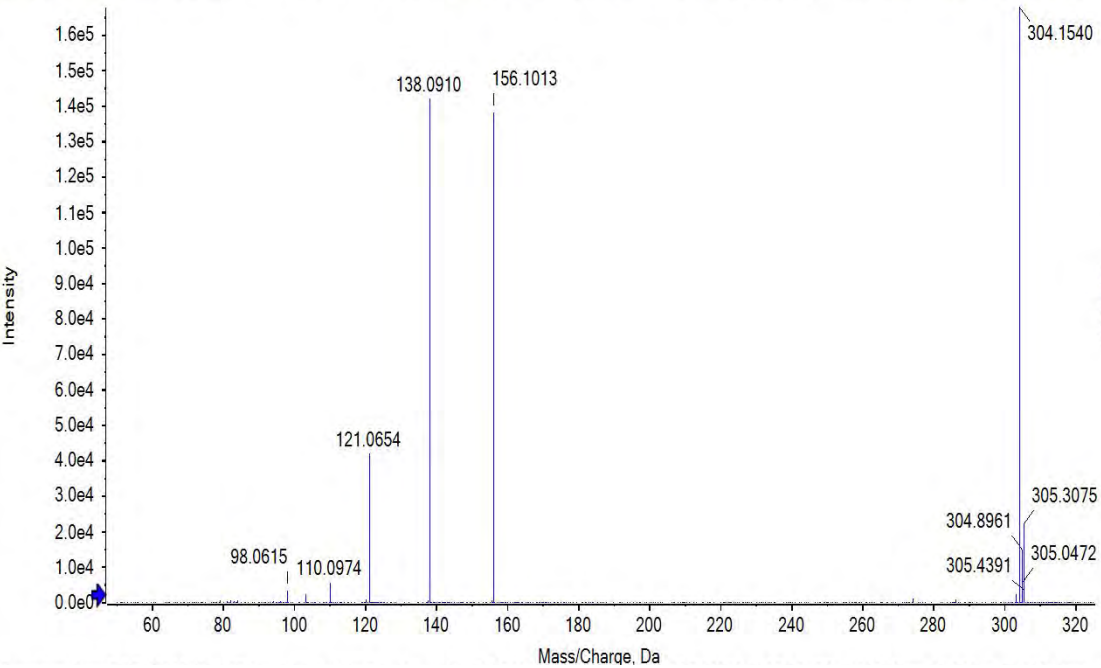

**b** 35eV

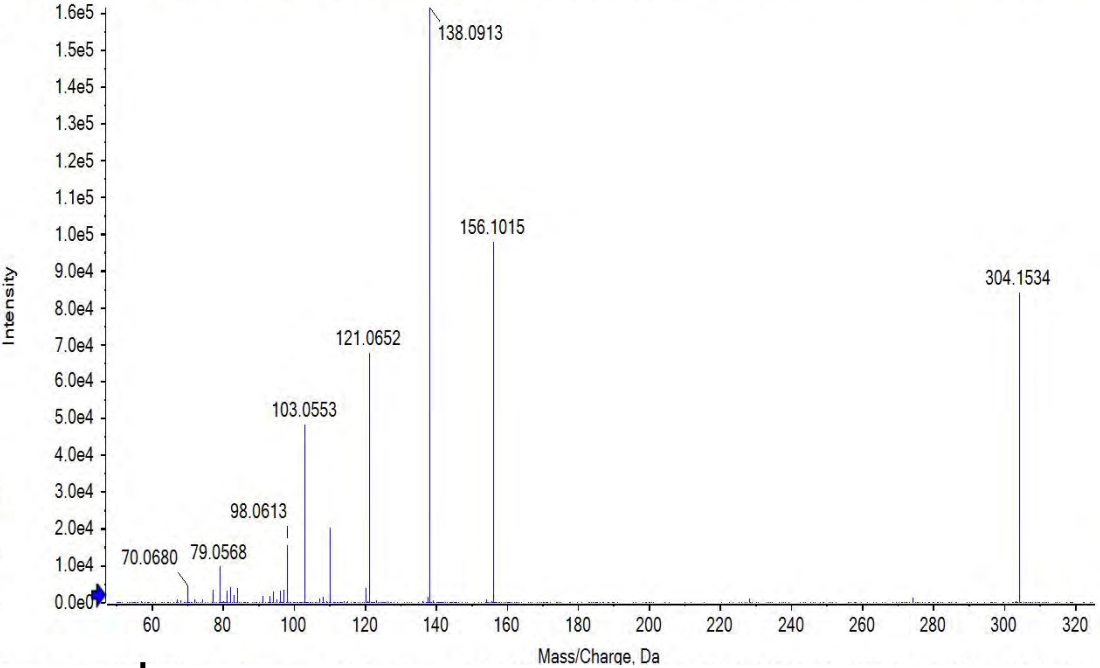

**c** 50 eV

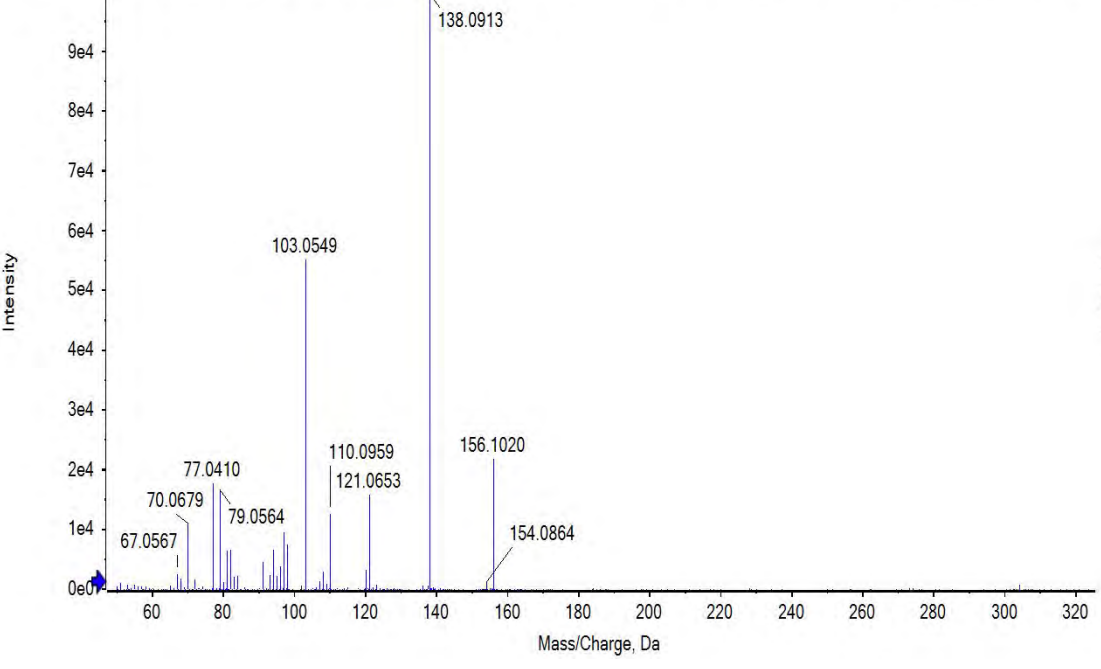

**d** CES

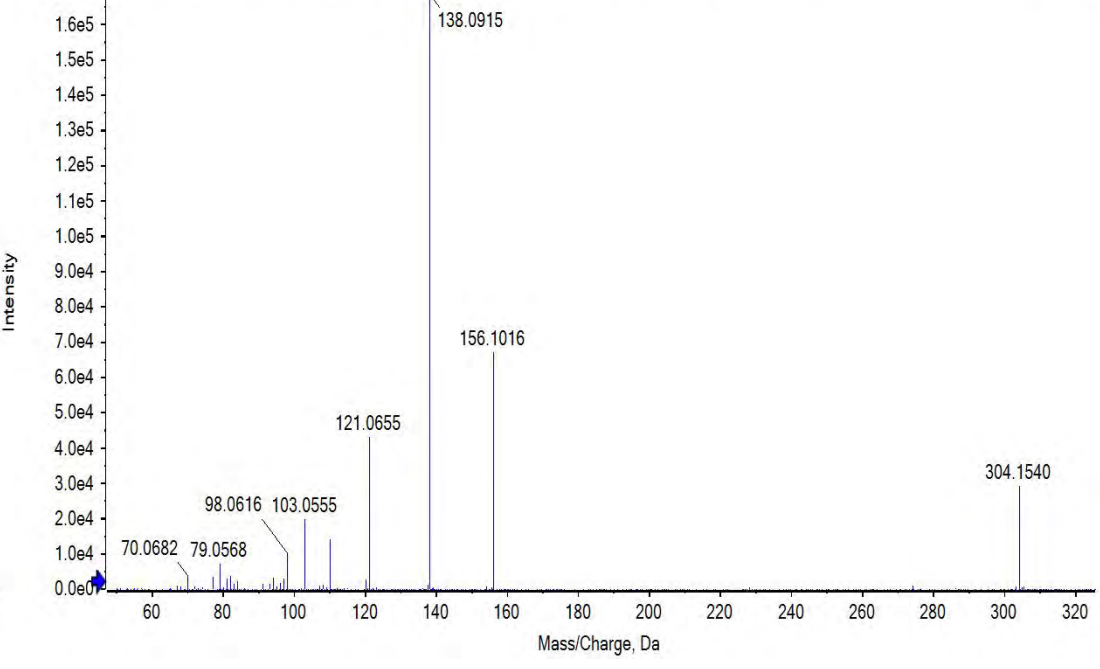

# 18. Picrotin

**a** -20 eV

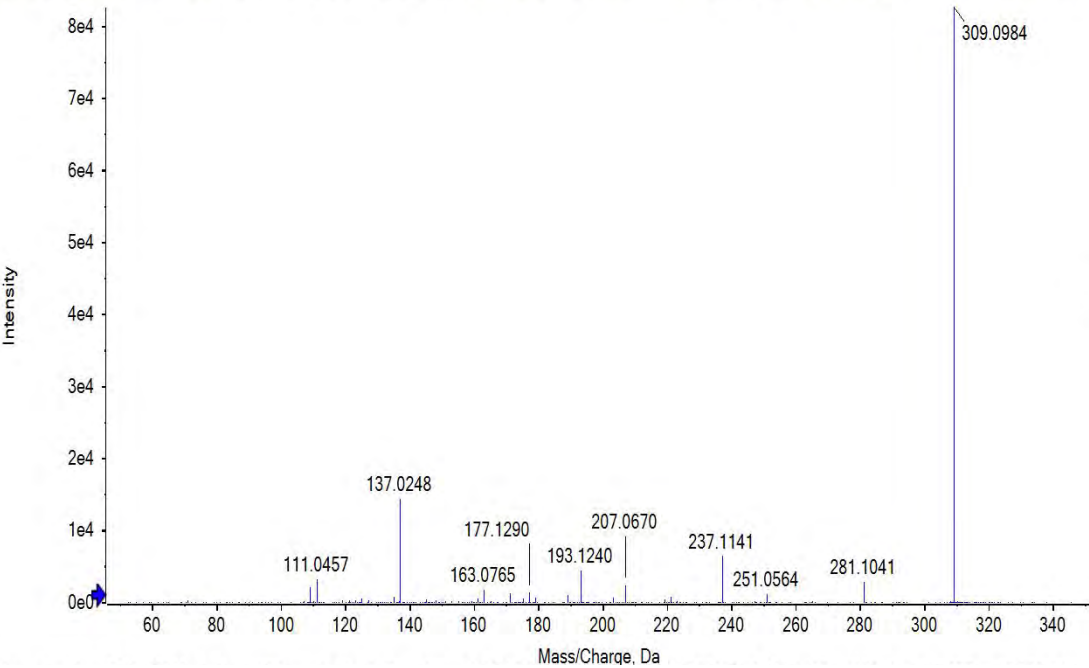

**b** -35eV

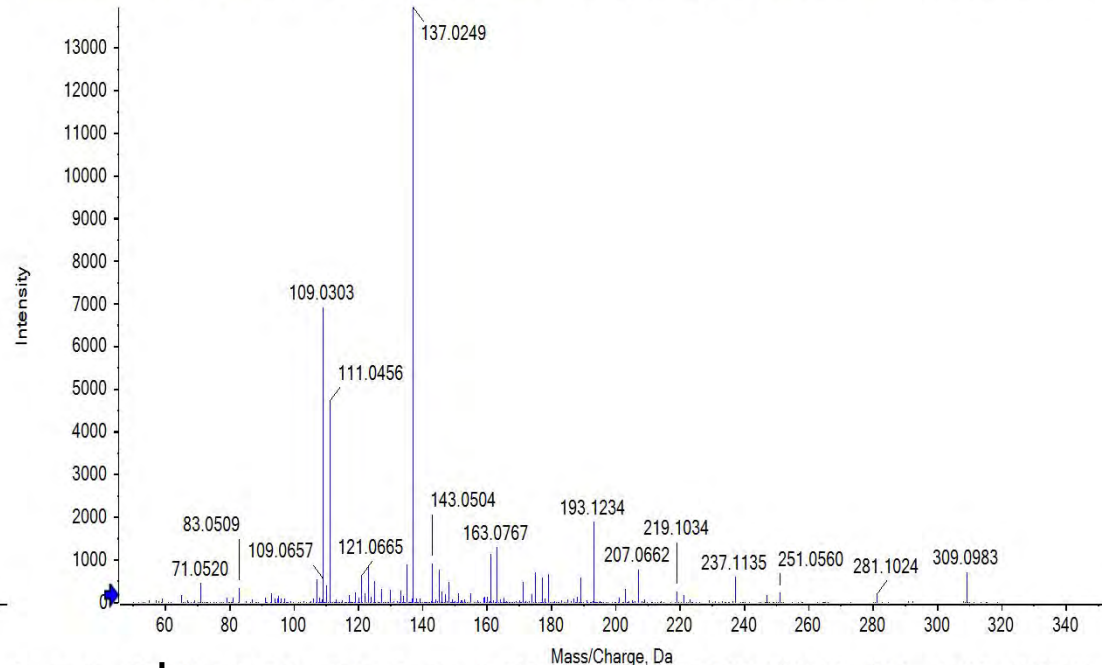

**c** -50 eV

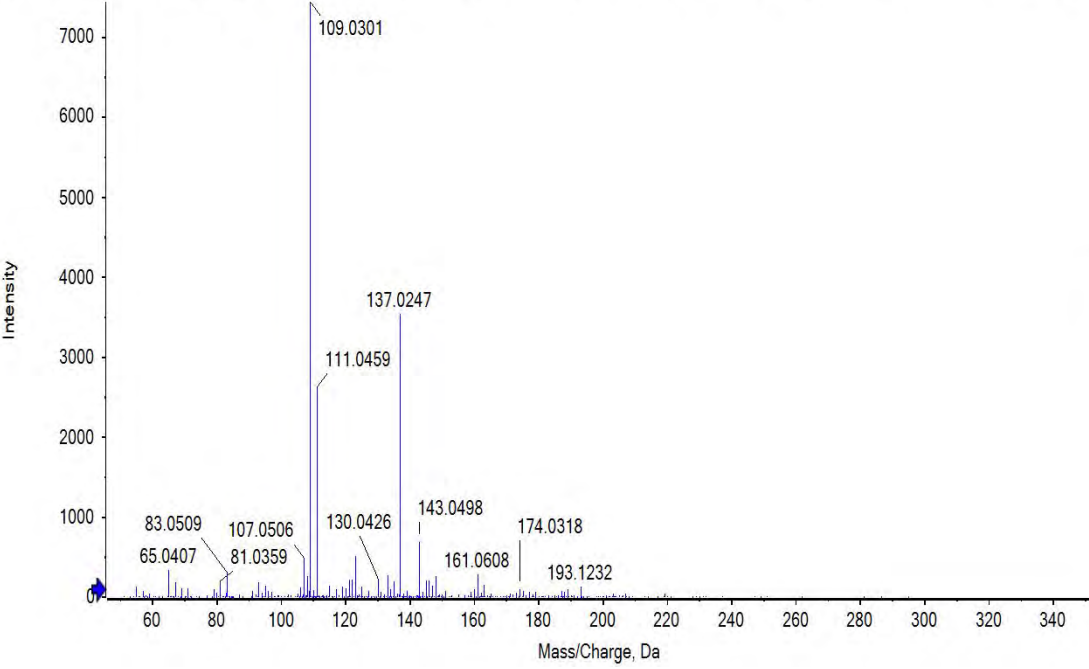

**d** CES

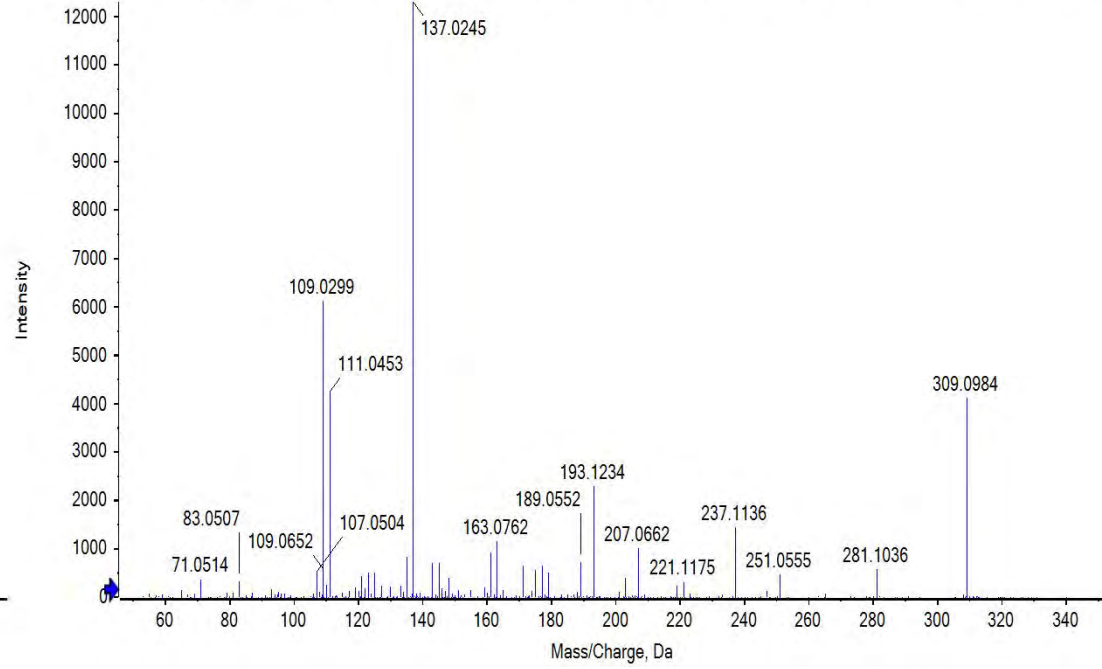

# 19. Picrotoxinin

**a** 20 eV

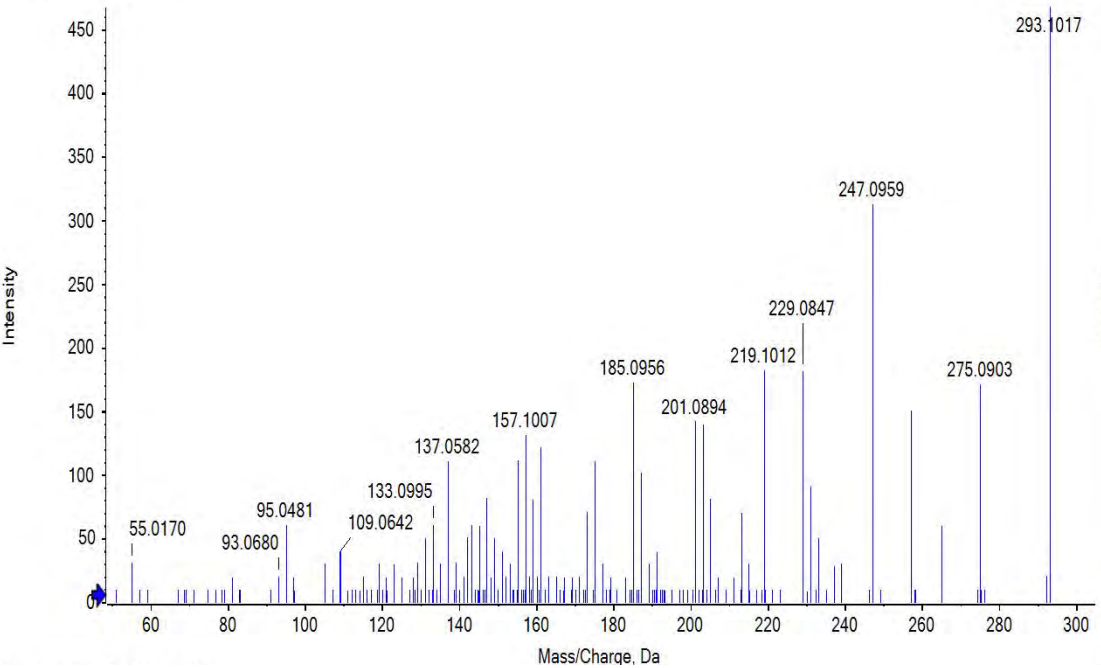

**b** 35eV

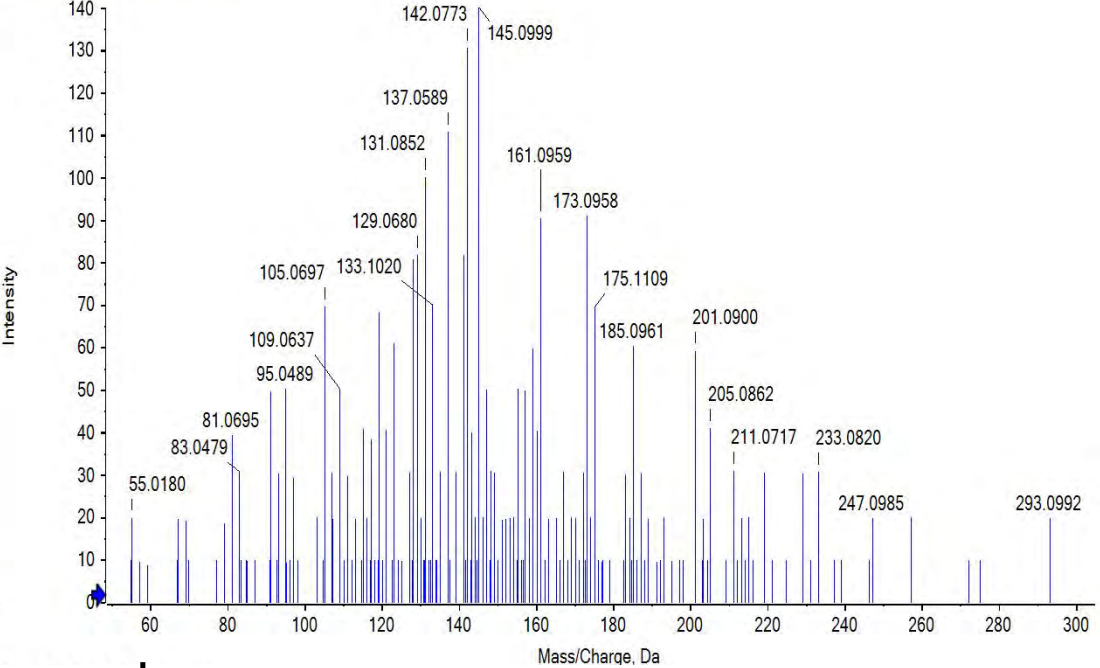

**c** 50 eV

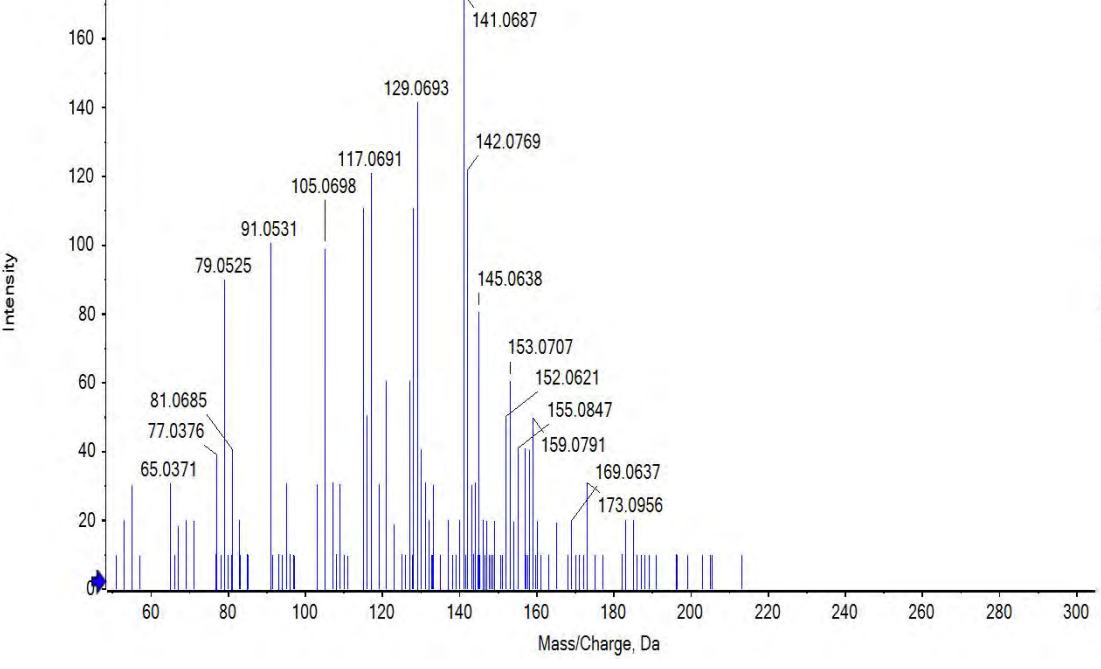

**d** CES

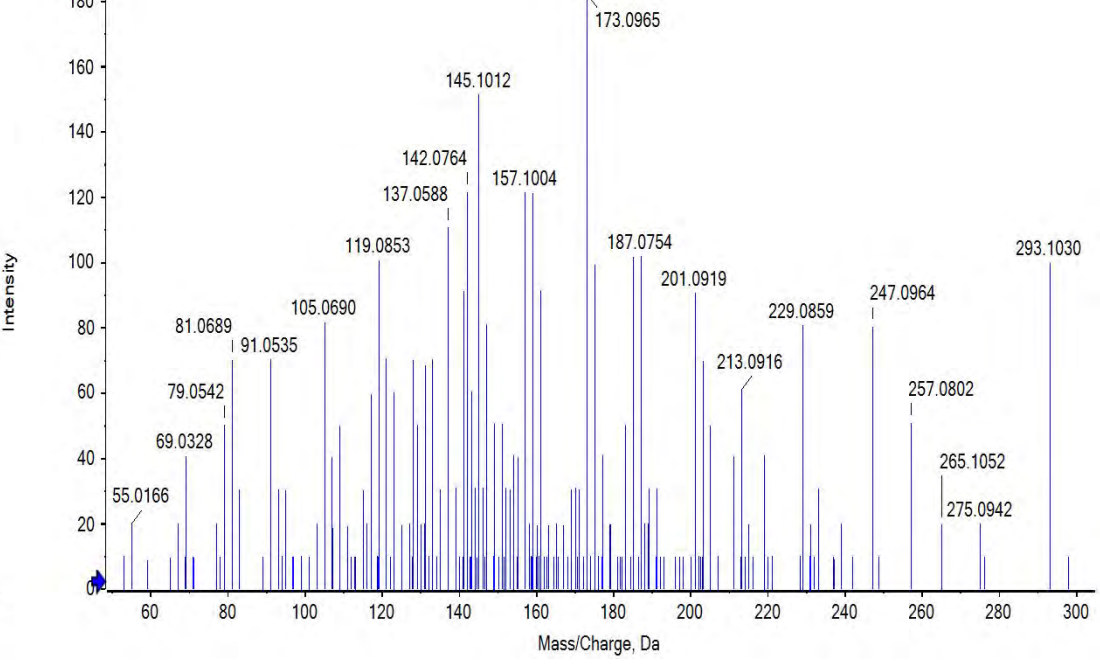

# 20. Strychnine

**a** 20 eV

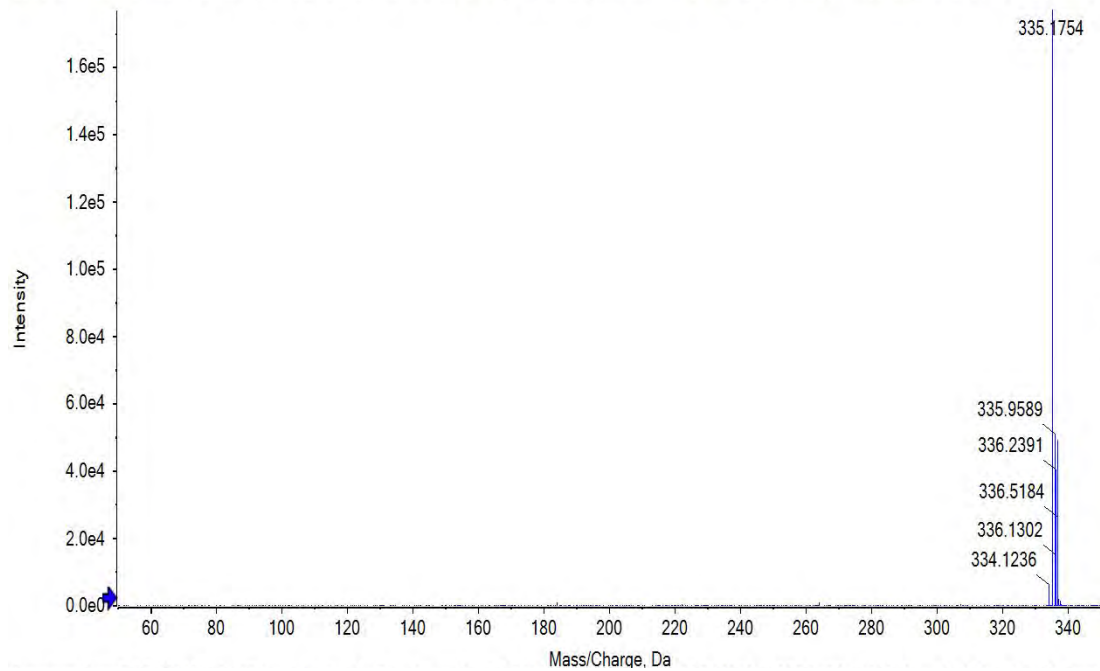

**b** 35eV

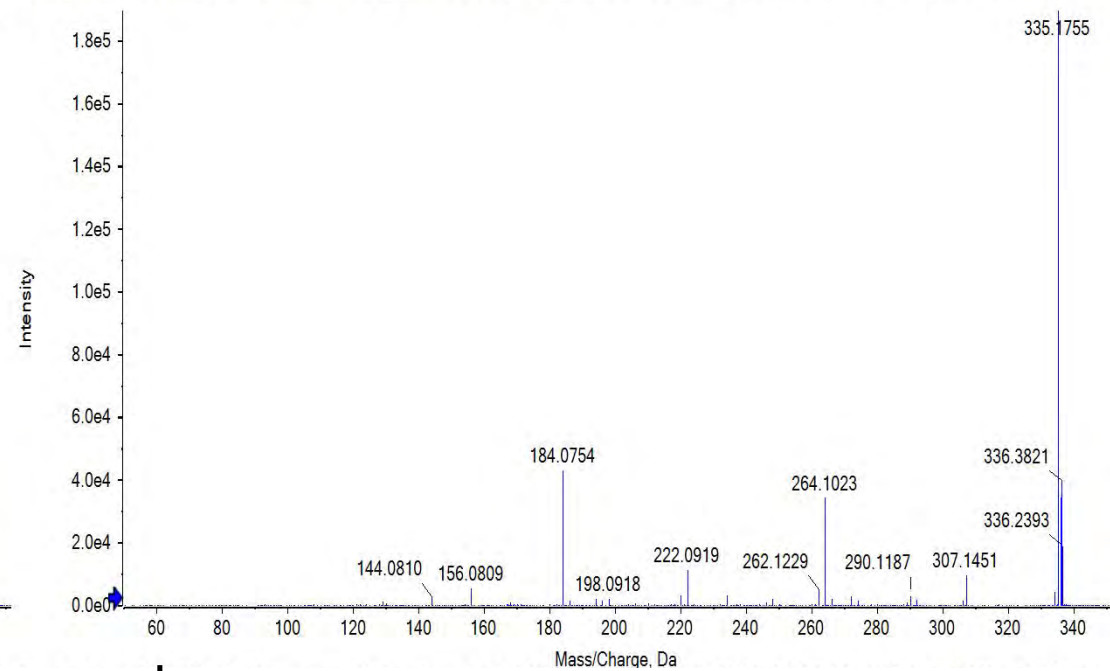

**c** 50 eV

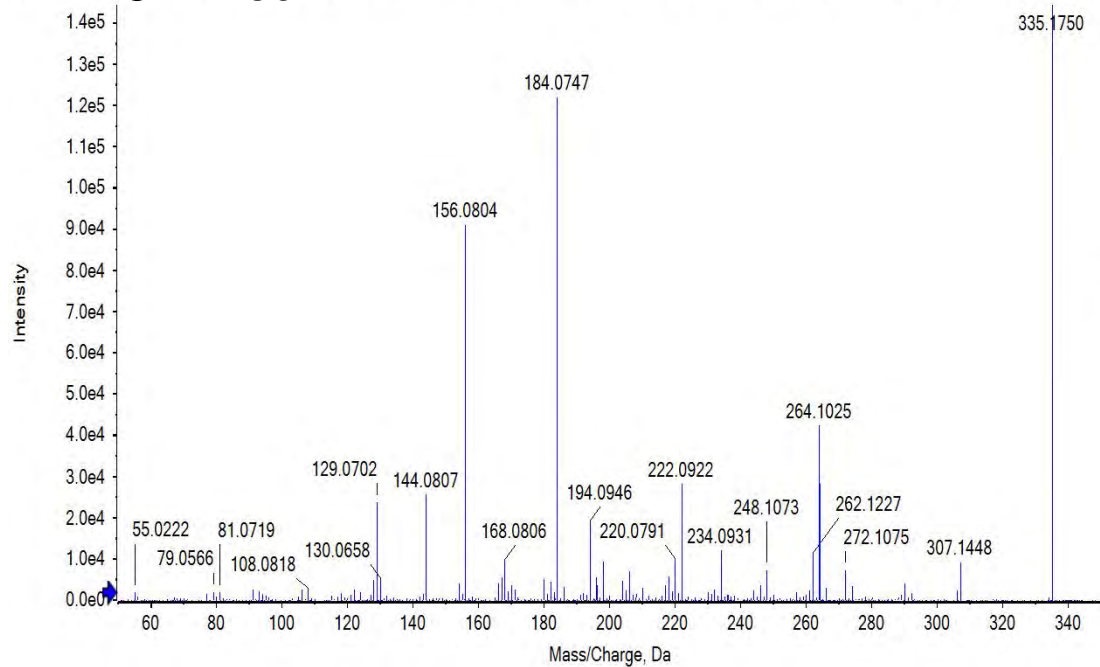

**d** CES

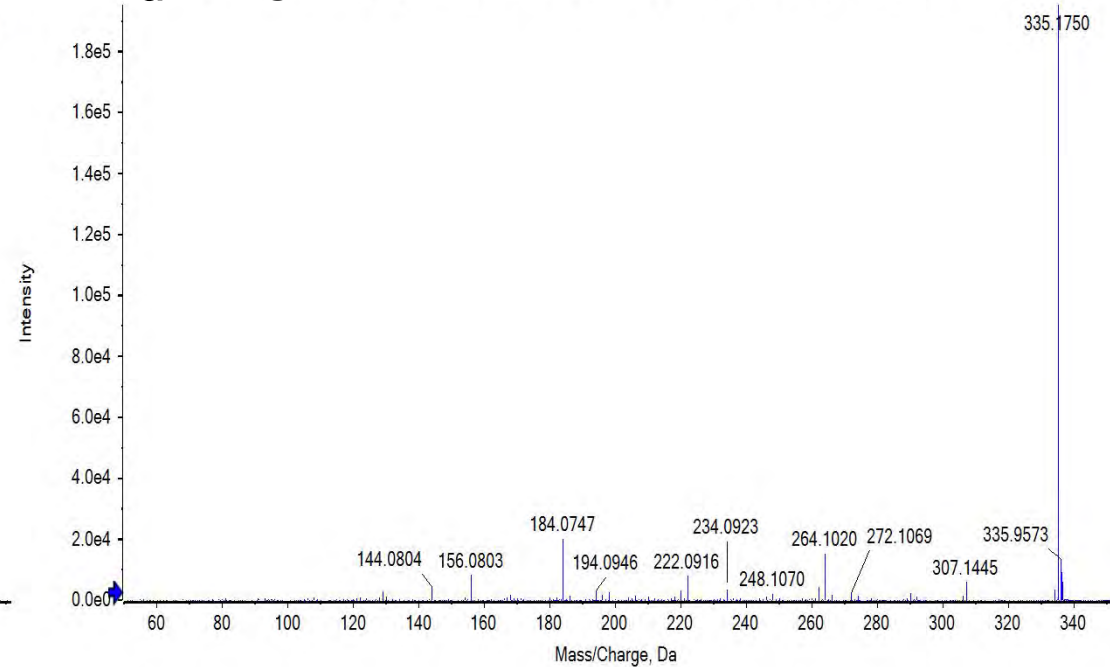

# 21. Berberine

**a** 20 eV

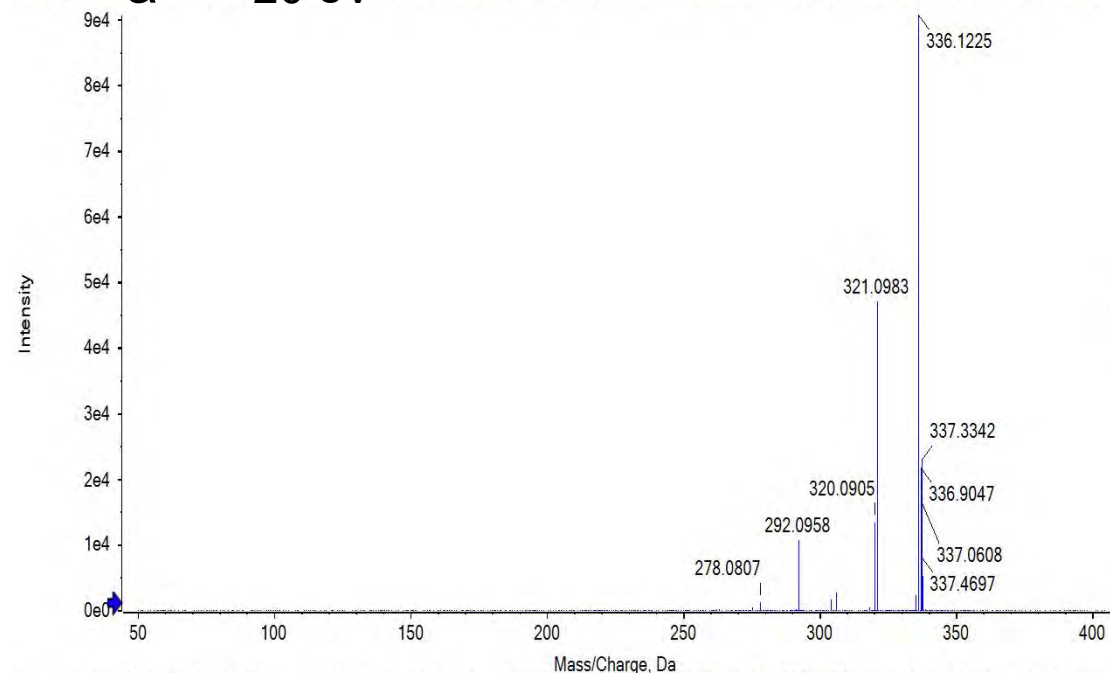

**b** 35eV

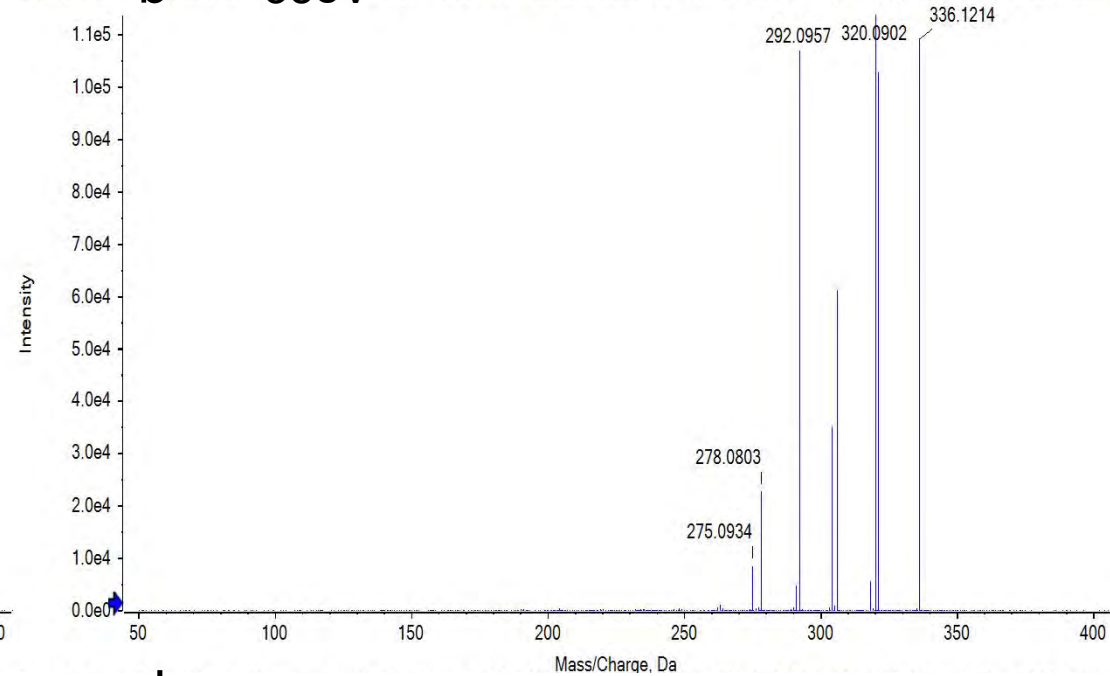

**c** 50 eV

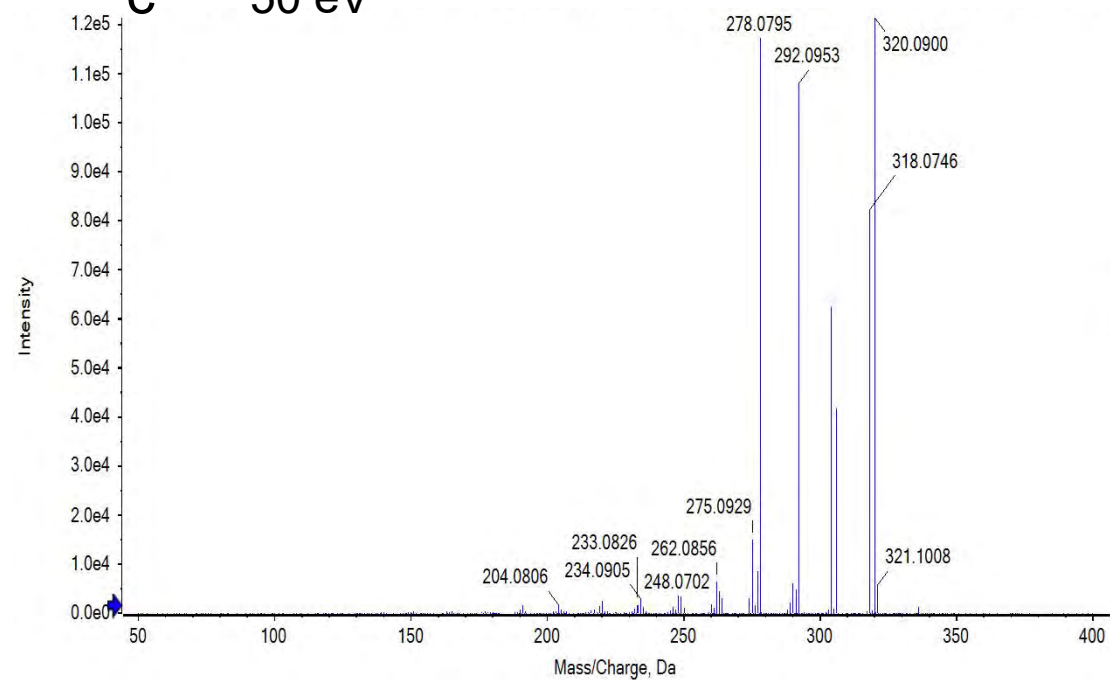

**d** CES

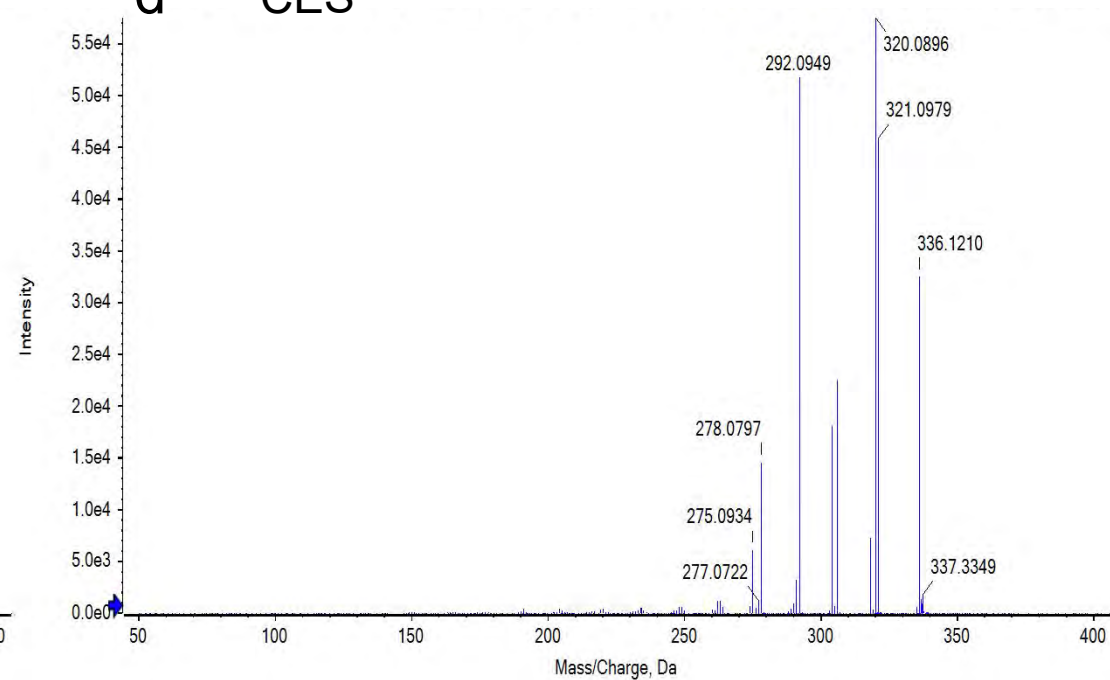

# 22. Cinchonidine

**a** 20 eV

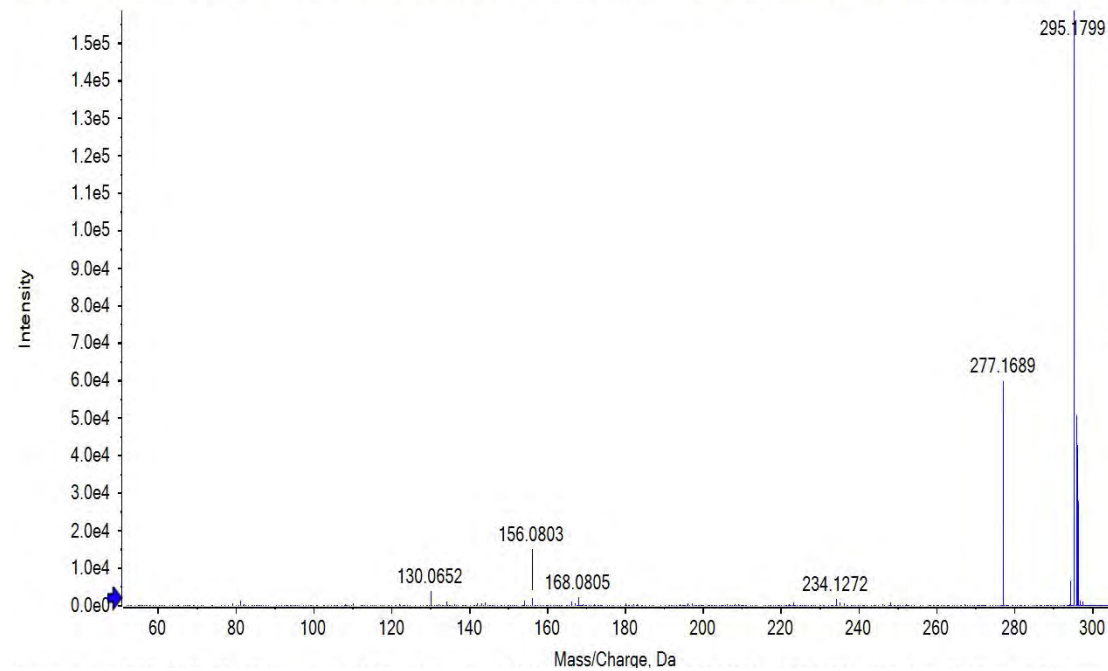

**b** 35eV

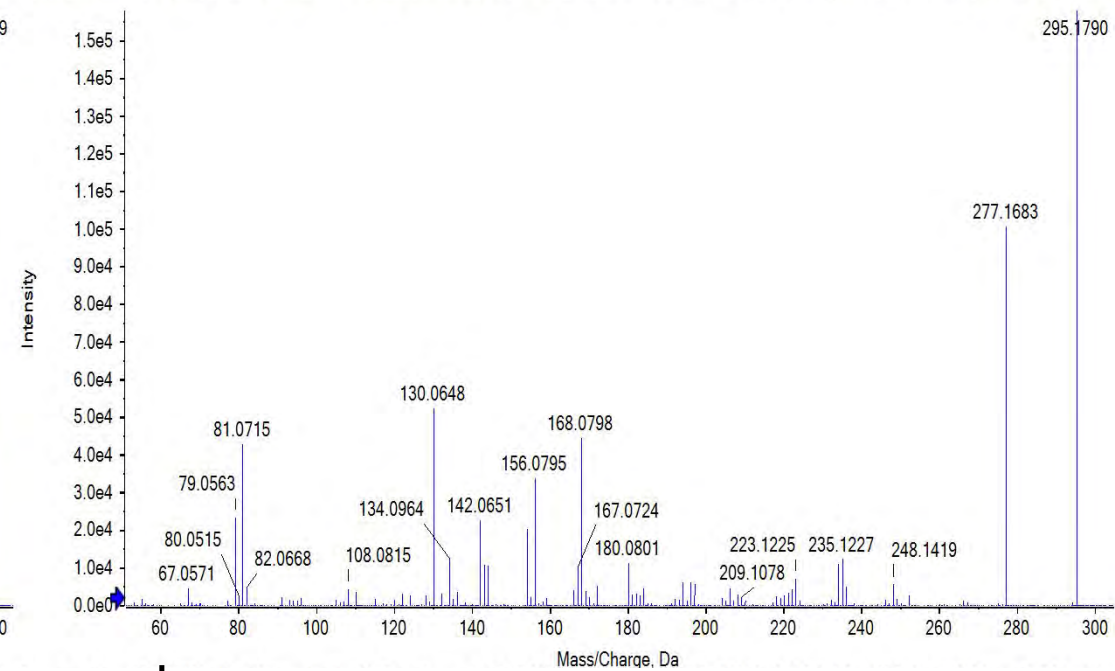

**c** 50 eV

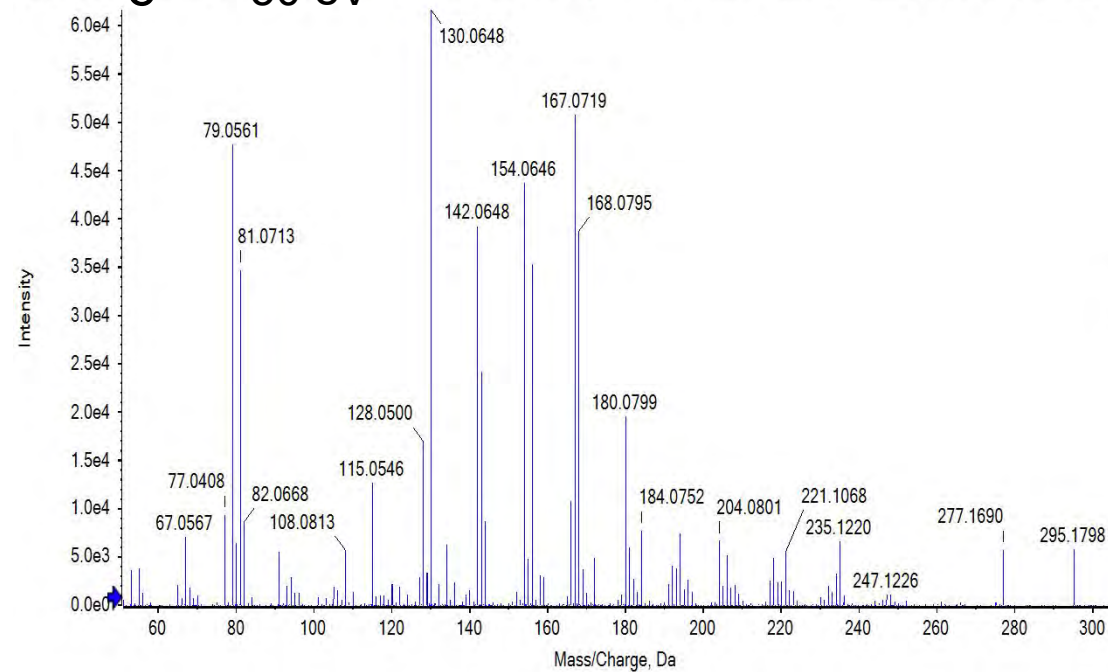

**d** CES

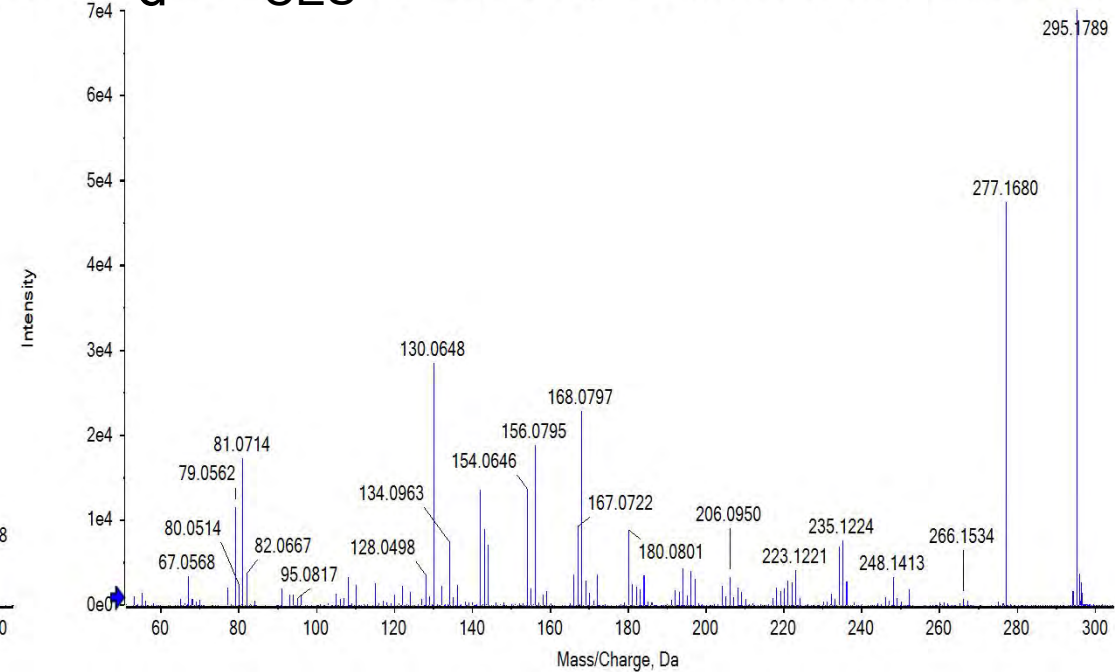

# 23. Benzoylaconine

**a** 20 eV

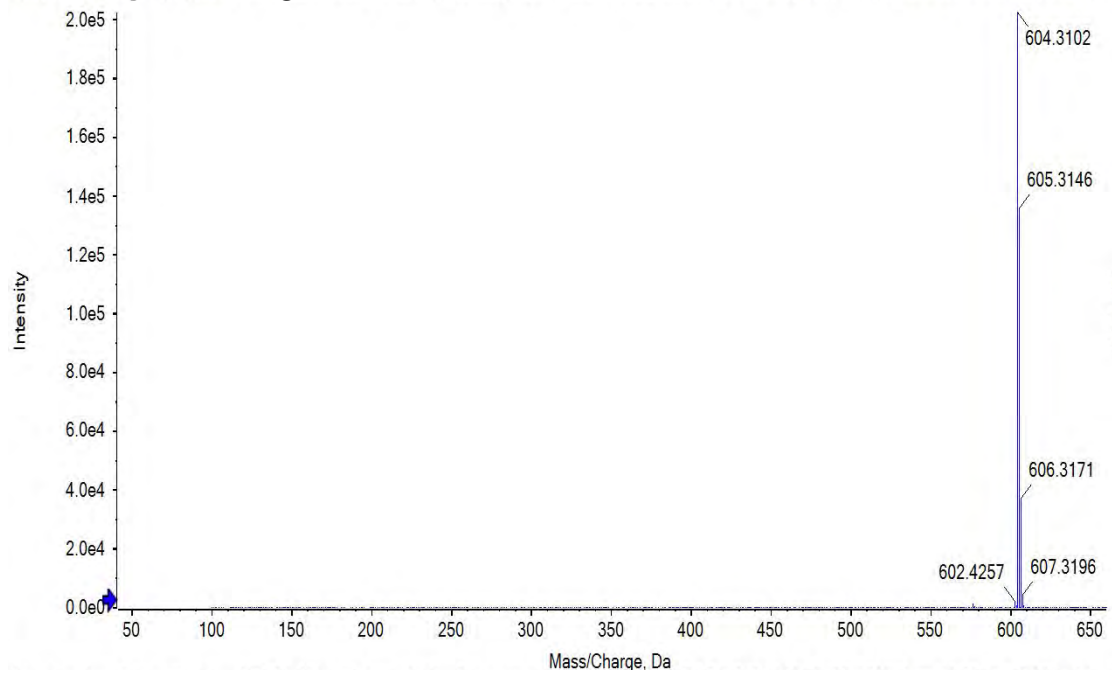

**b** 35eV

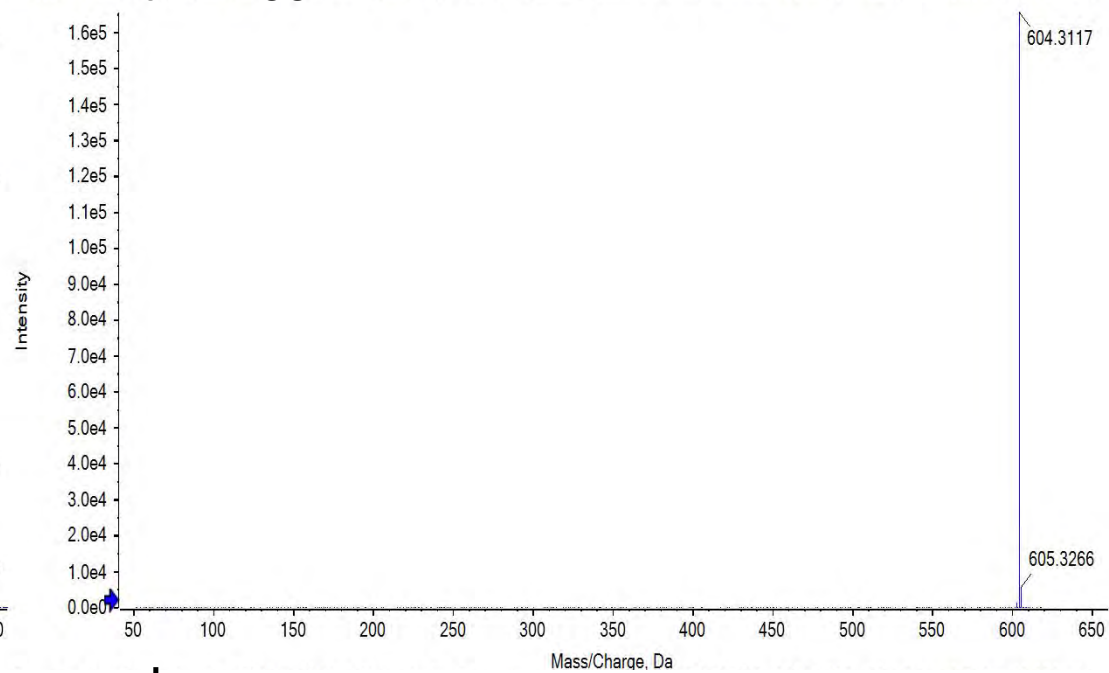

**c** 50 eV

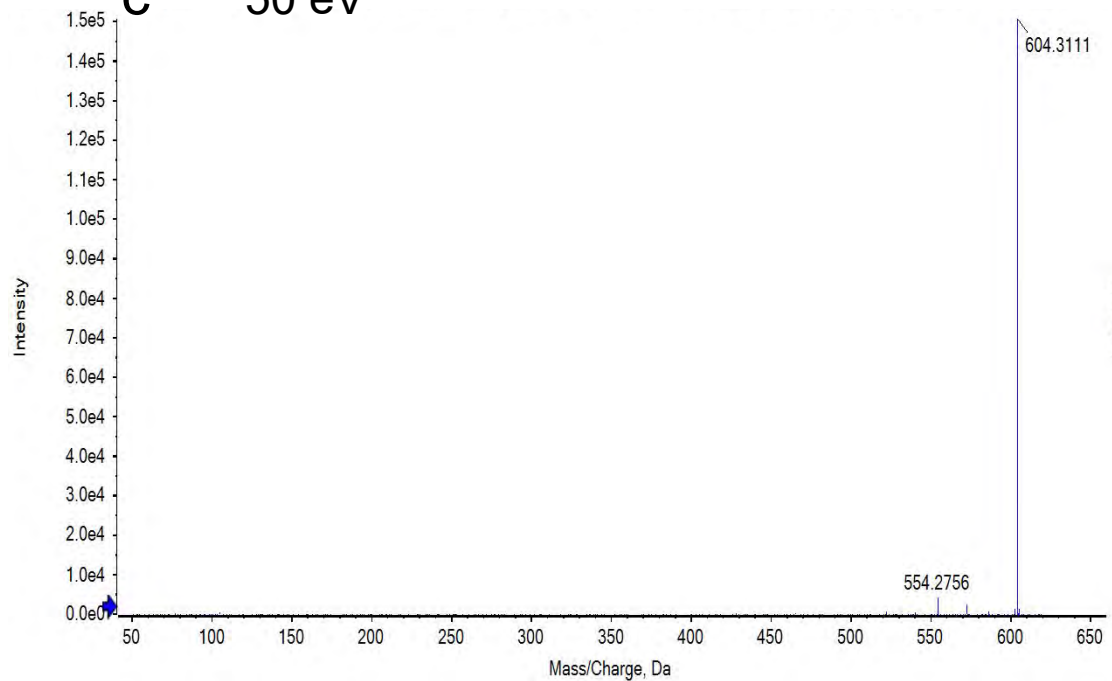

**d** CES

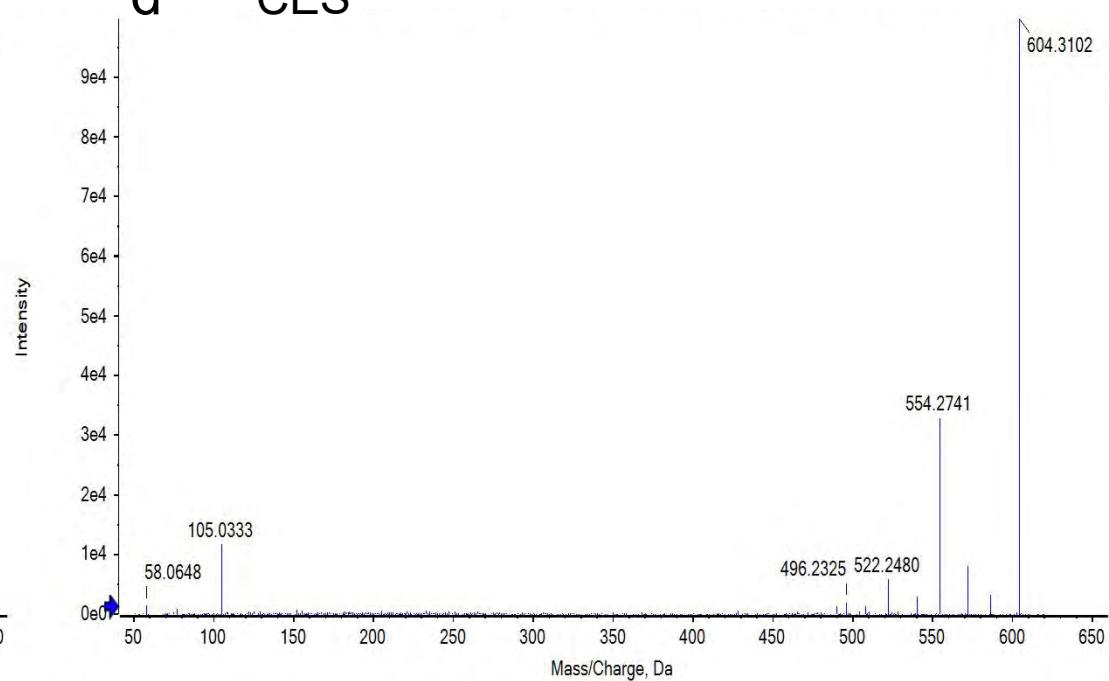

# 24. Phalloidin

**a** 20 eV

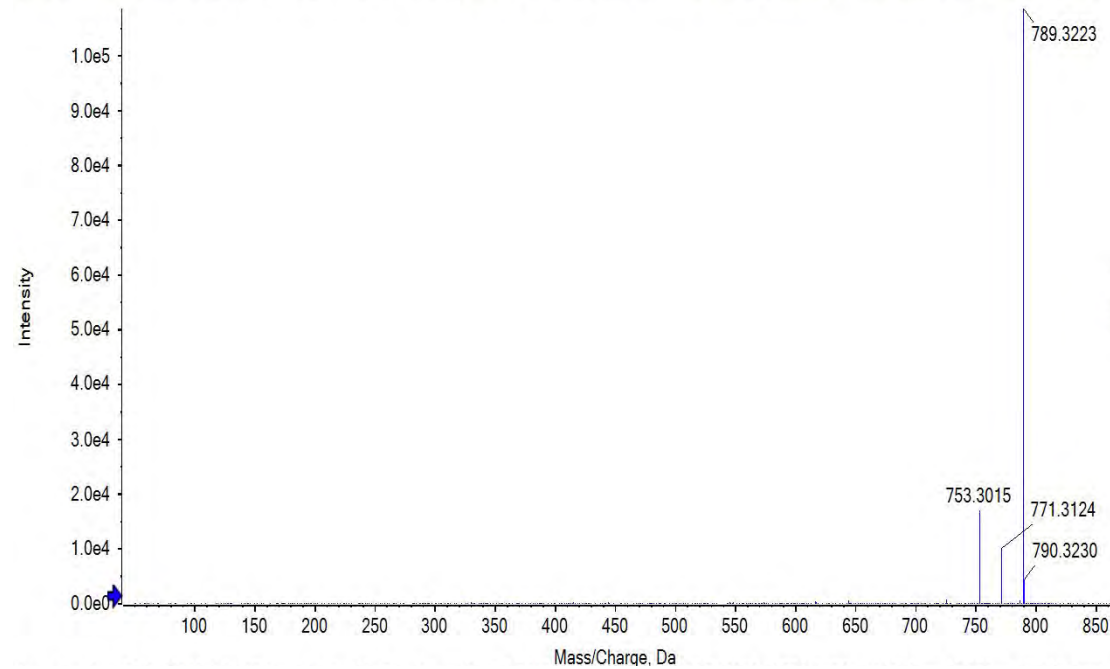

**b** 35eV

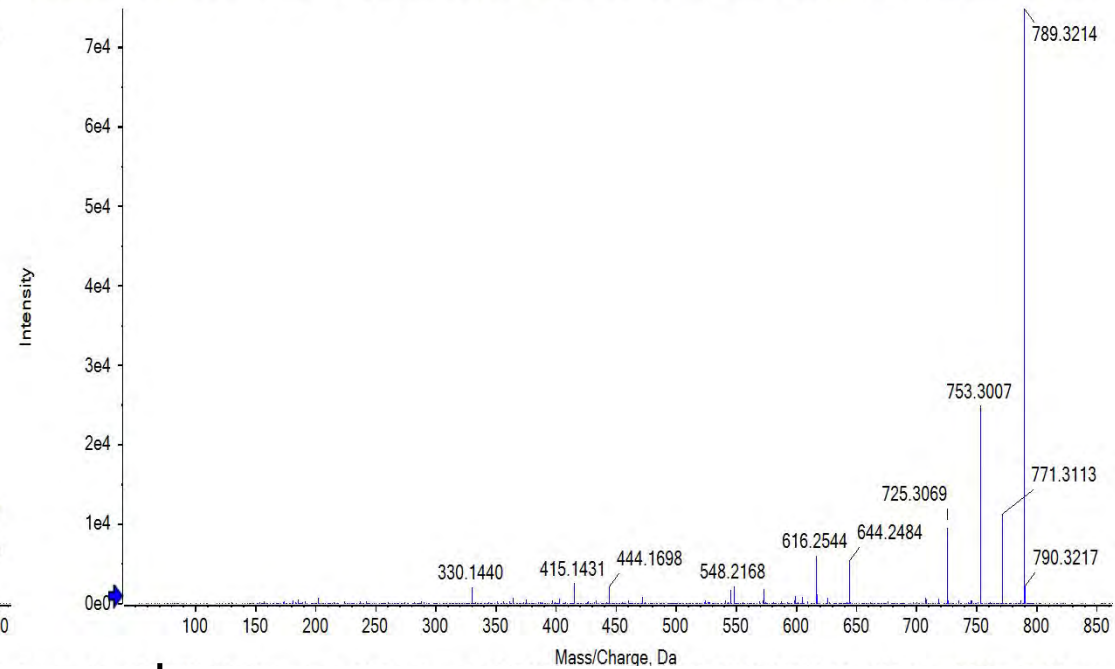

**c** 50 eV

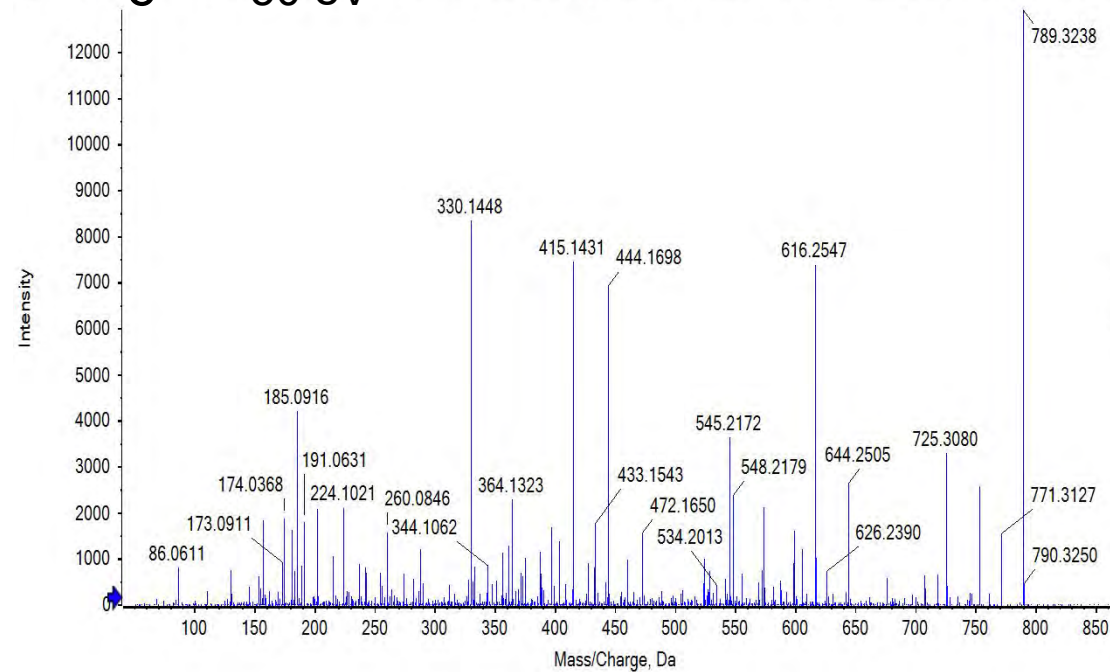

**d** CES

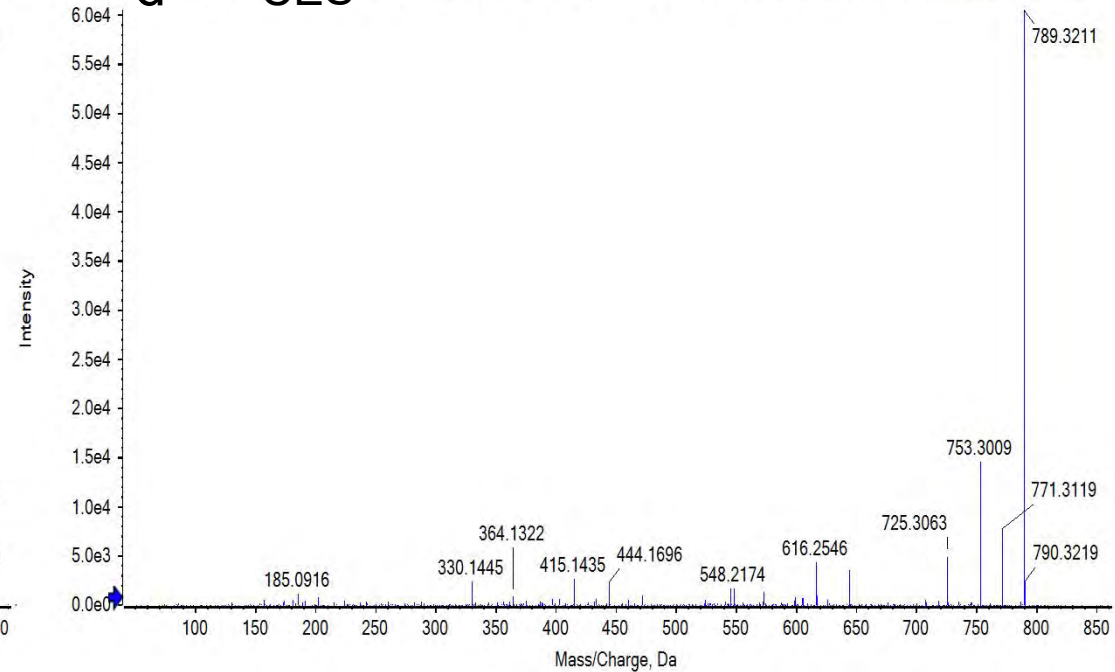



# 25. Aflatoxin G2

**a** 20 eV

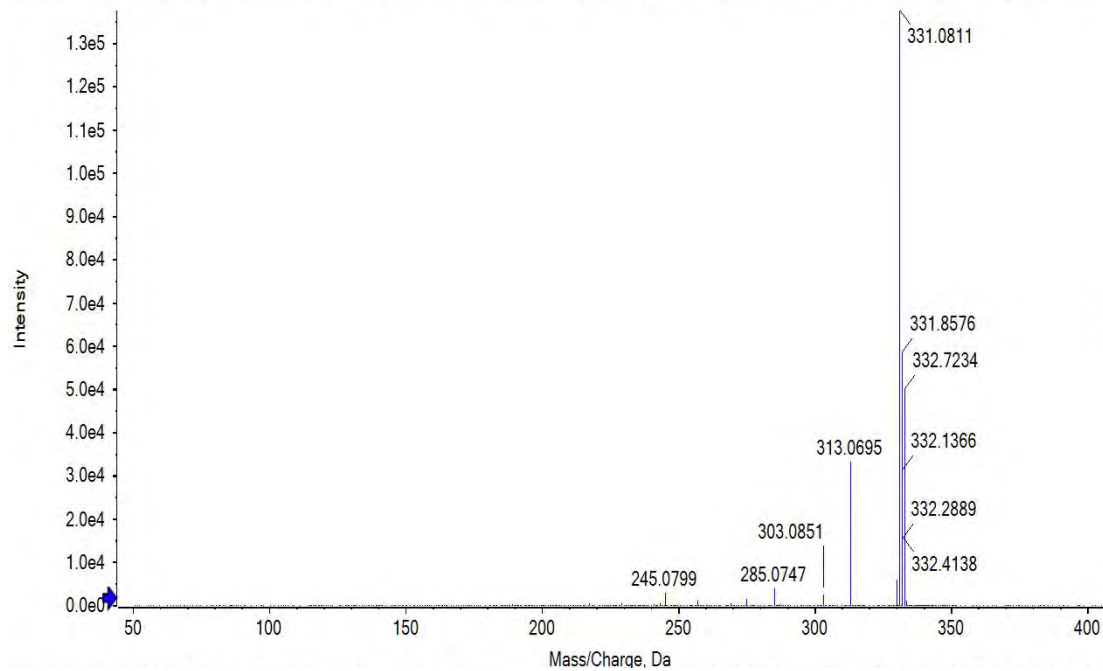

**b** 35eV

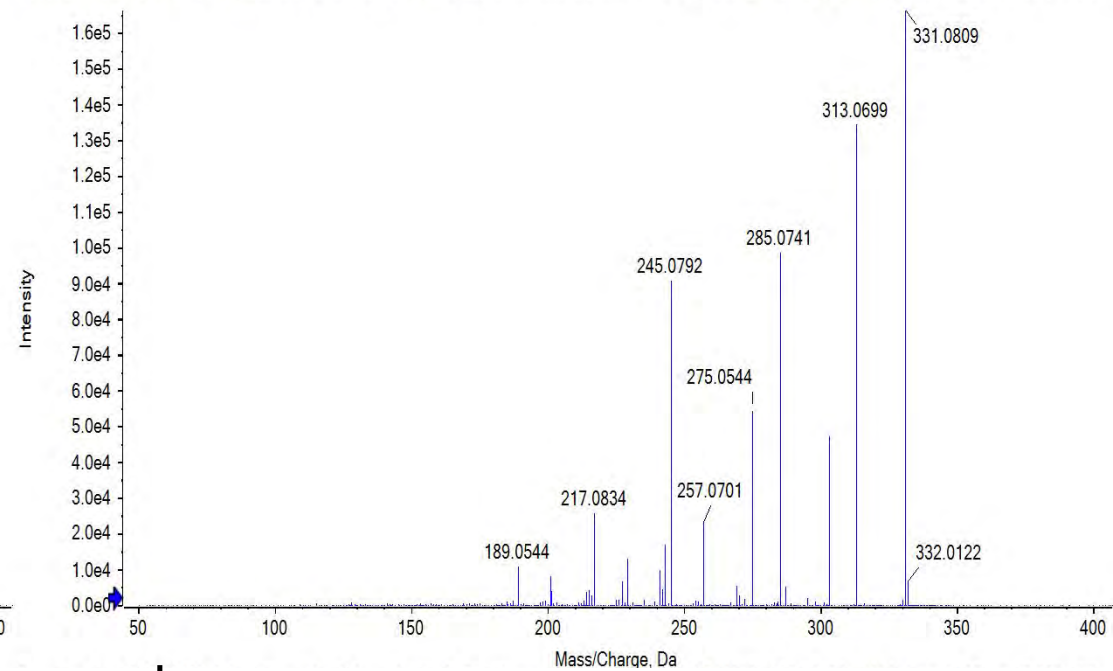

**c** 50 eV

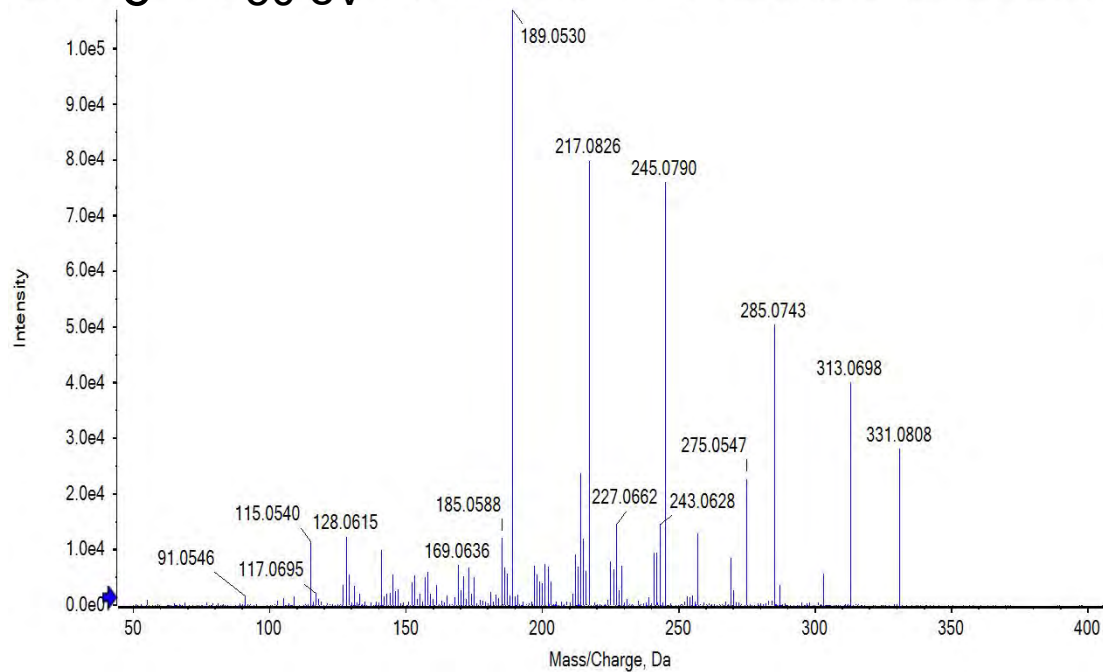

**d** CES

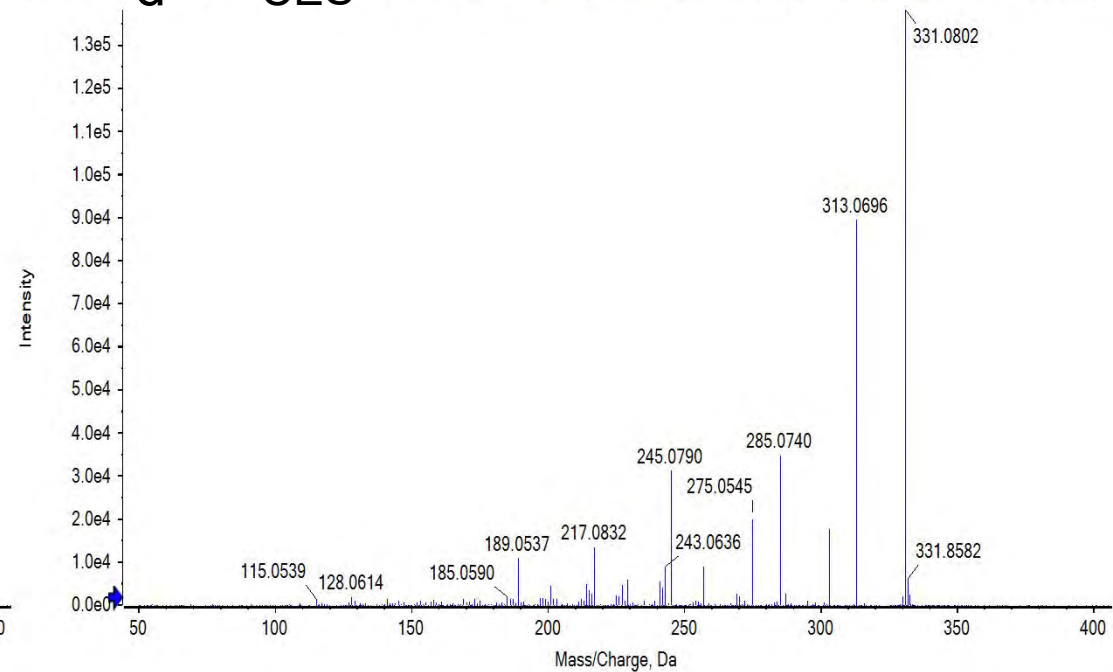

# 26. Benzoylmesaconine

**a** 20 eV

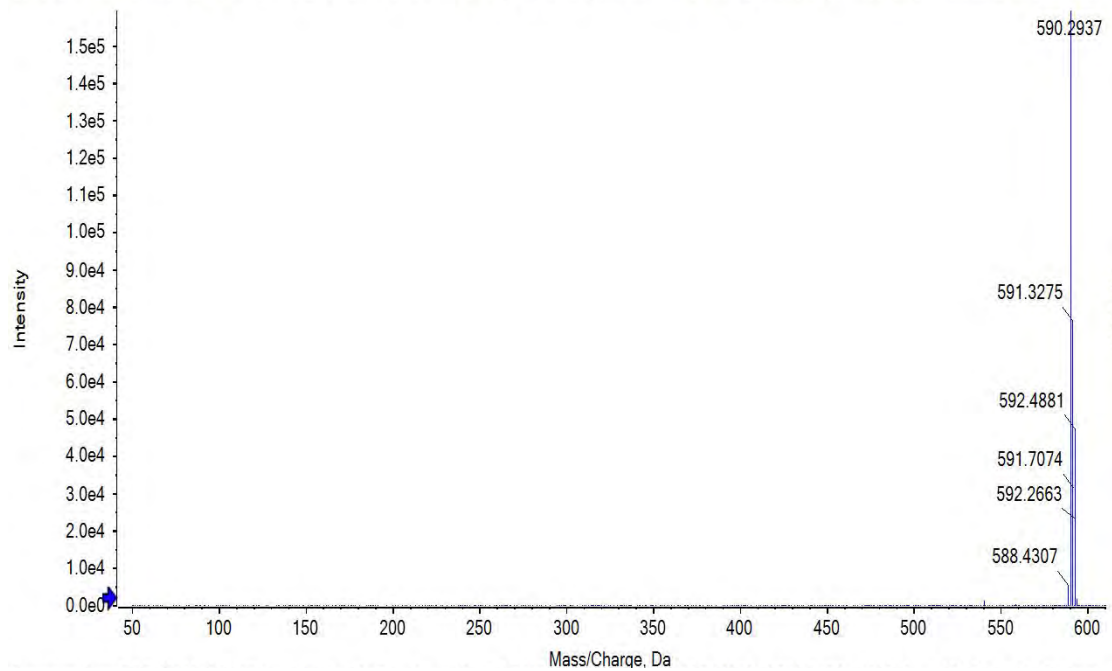

**b** 35eV

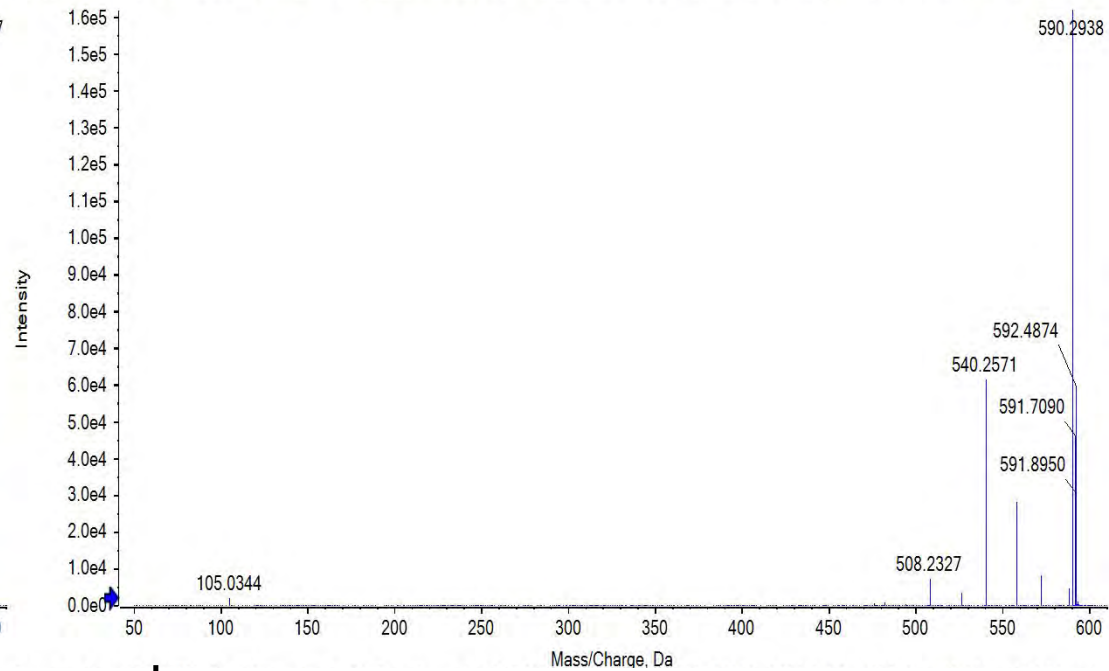

**c** 50 eV

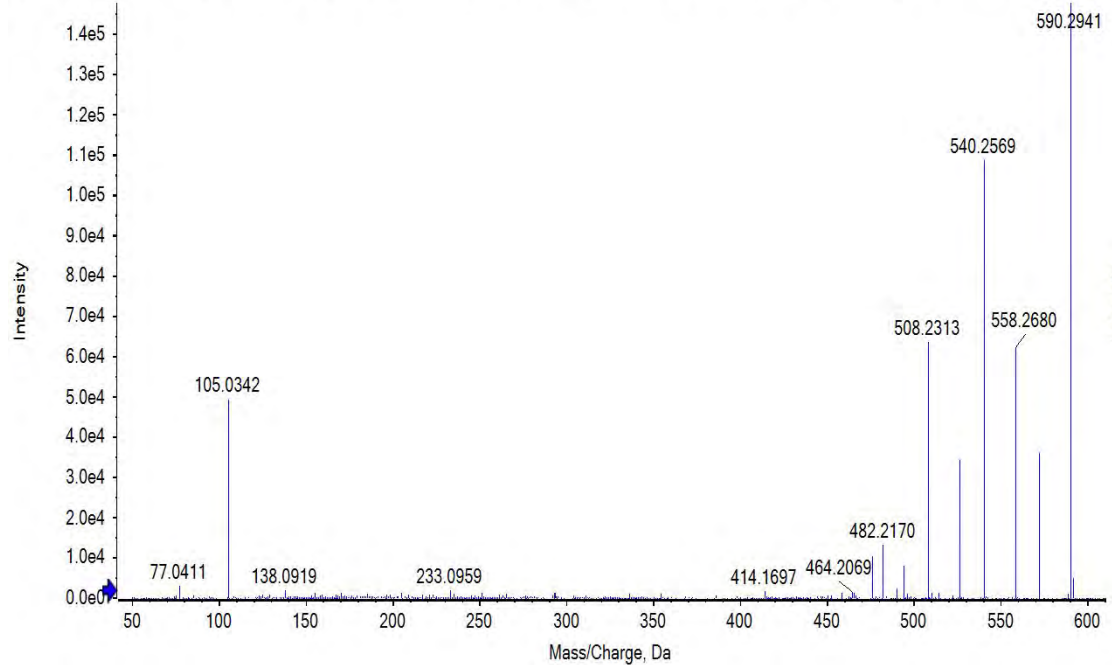

**d** CES

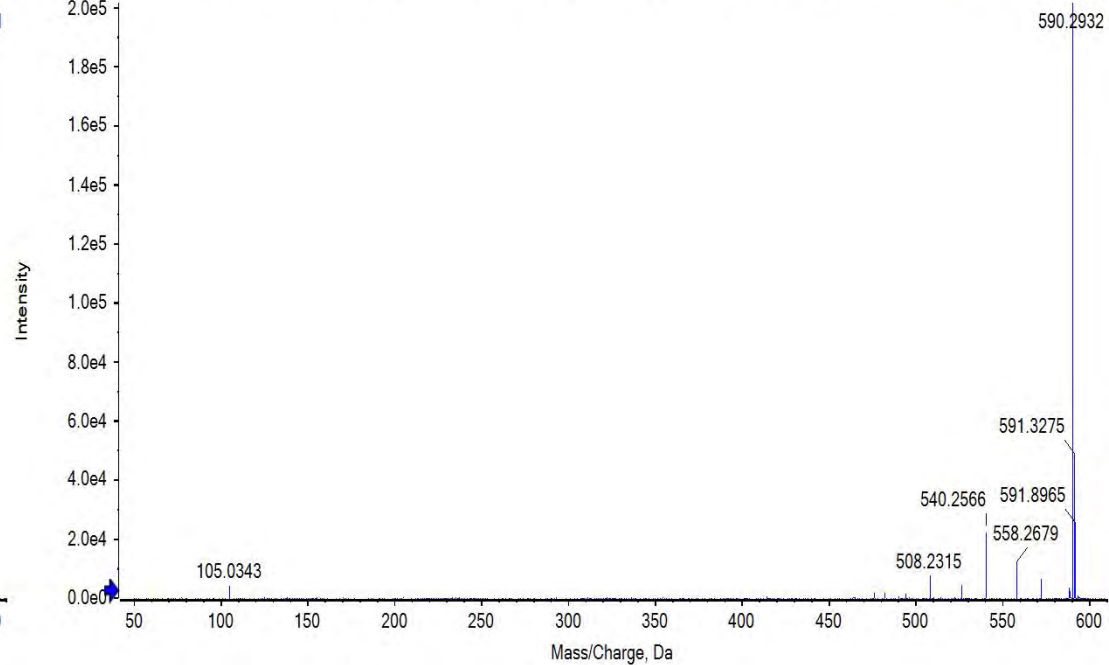

# 27. Aflatoxin G1

**a** 20 eV

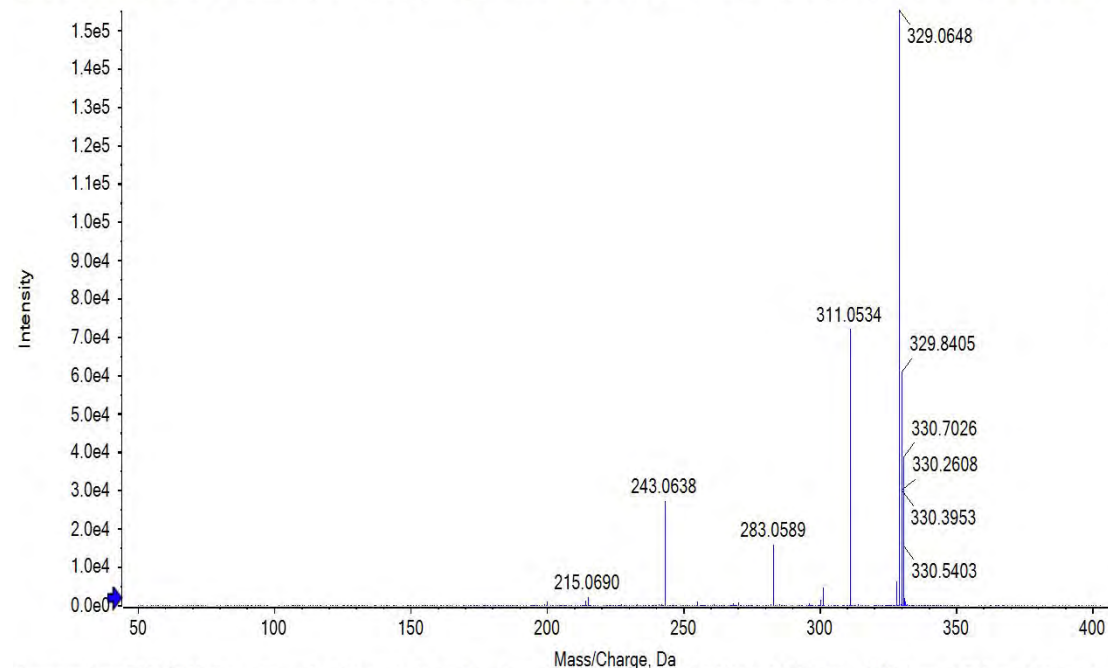

**b** 35eV

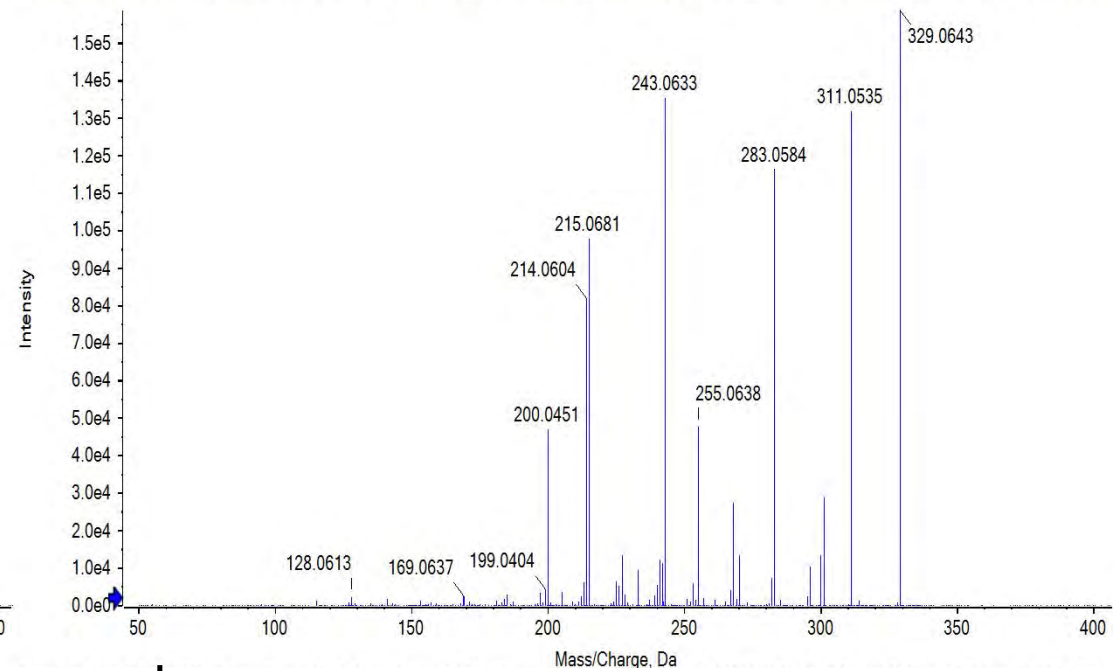

**c** 50 eV

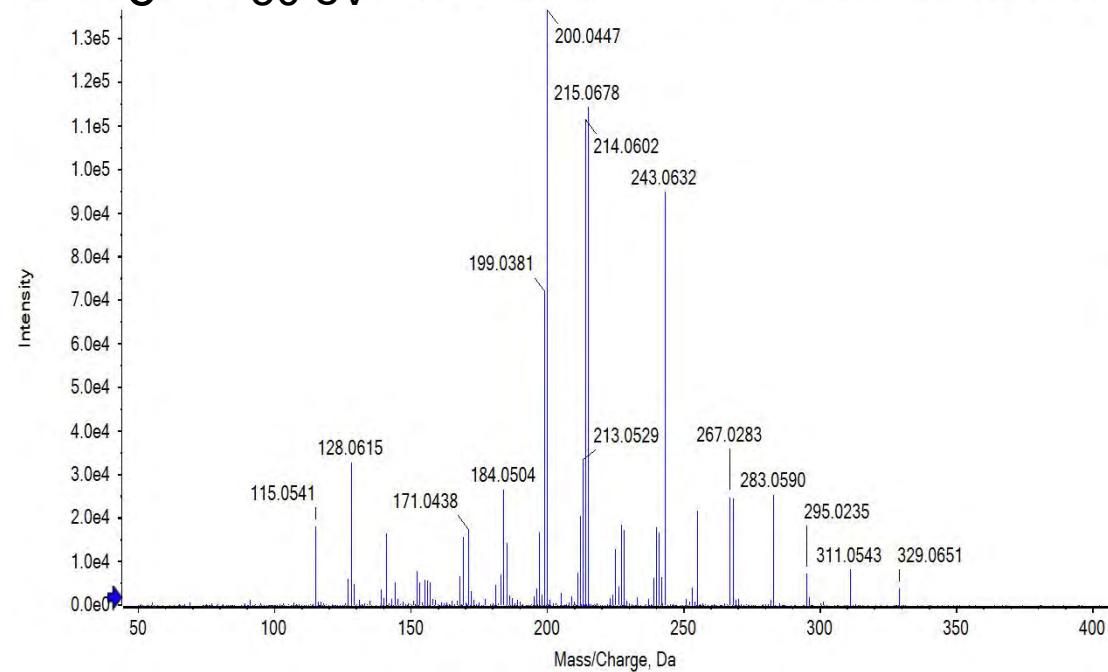

**d** CES

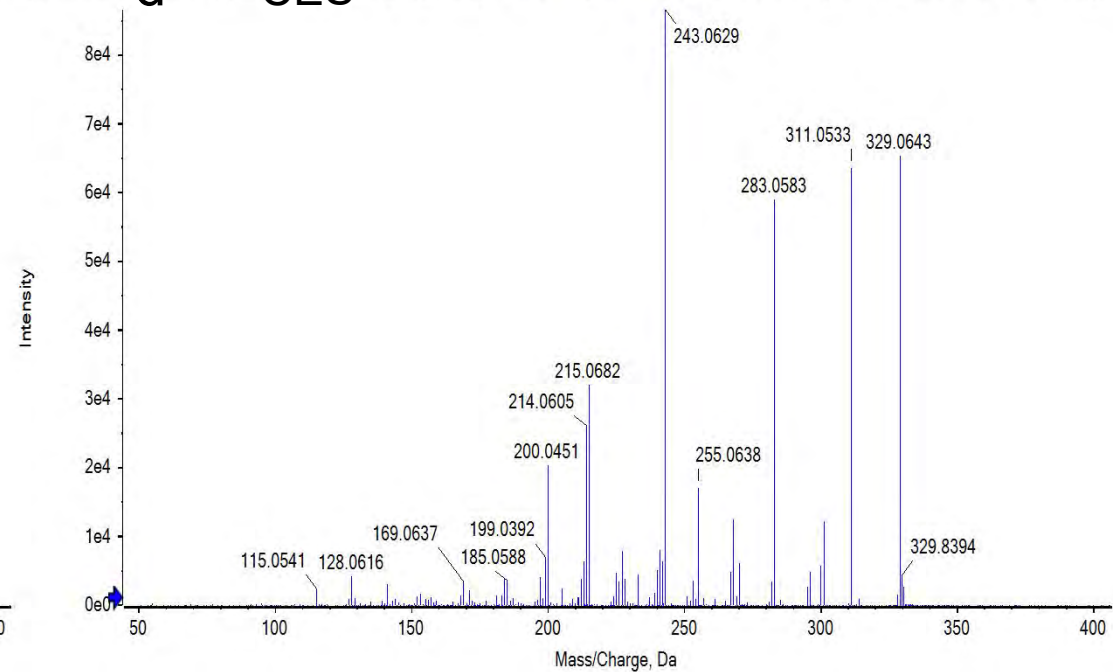

# 28. Convallatoxin

**a** 20 eV

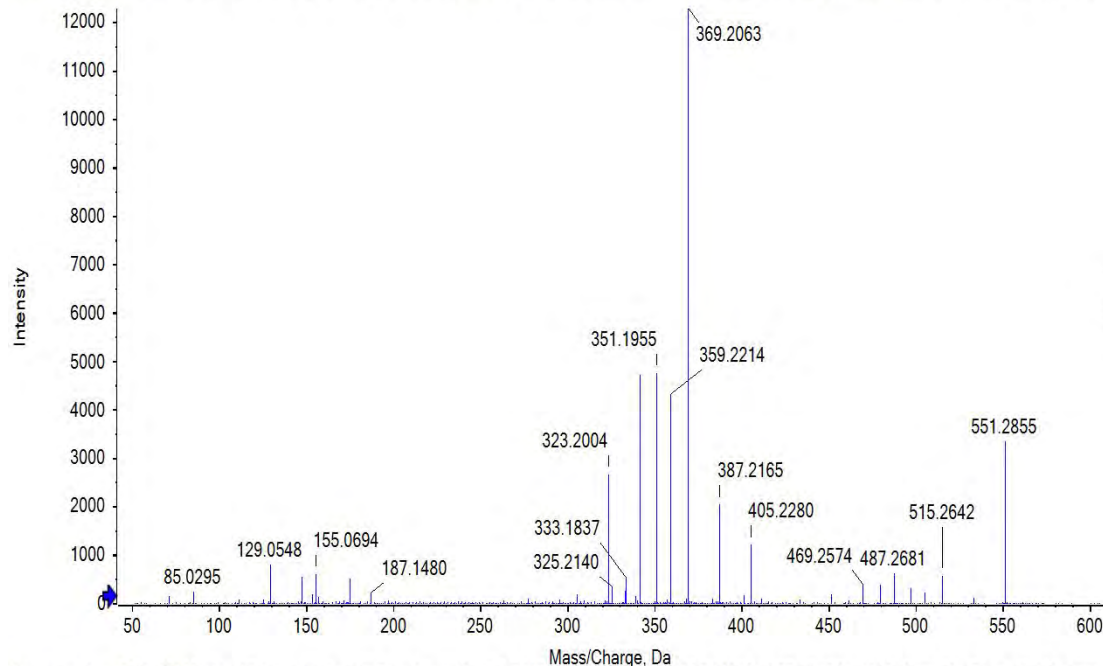

**b** 35eV

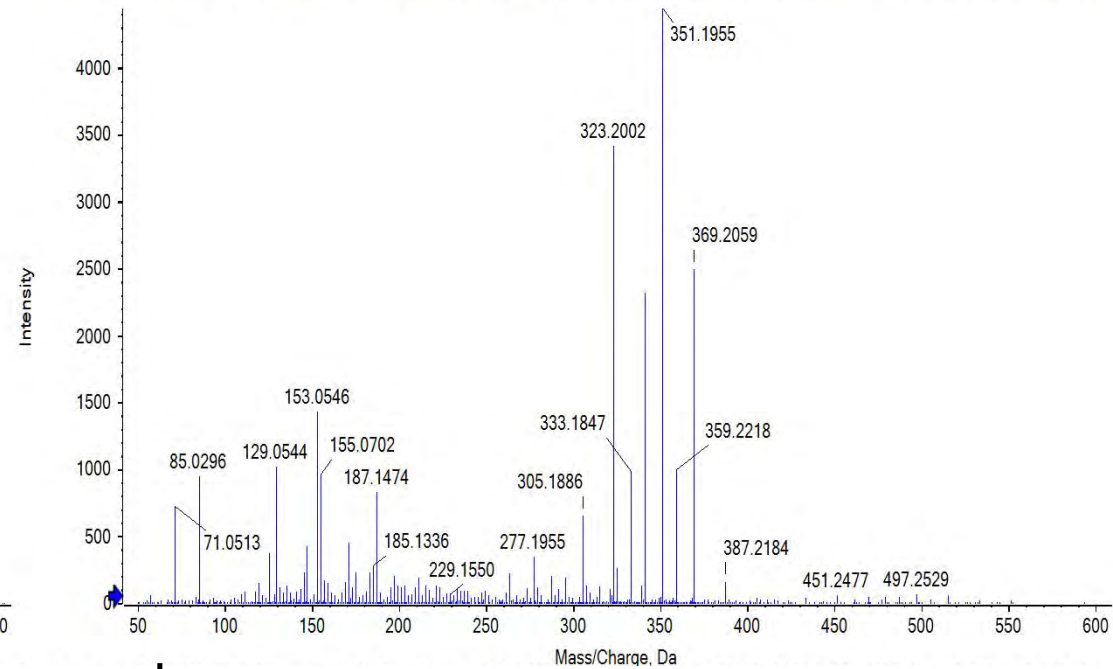

**c** 50 eV

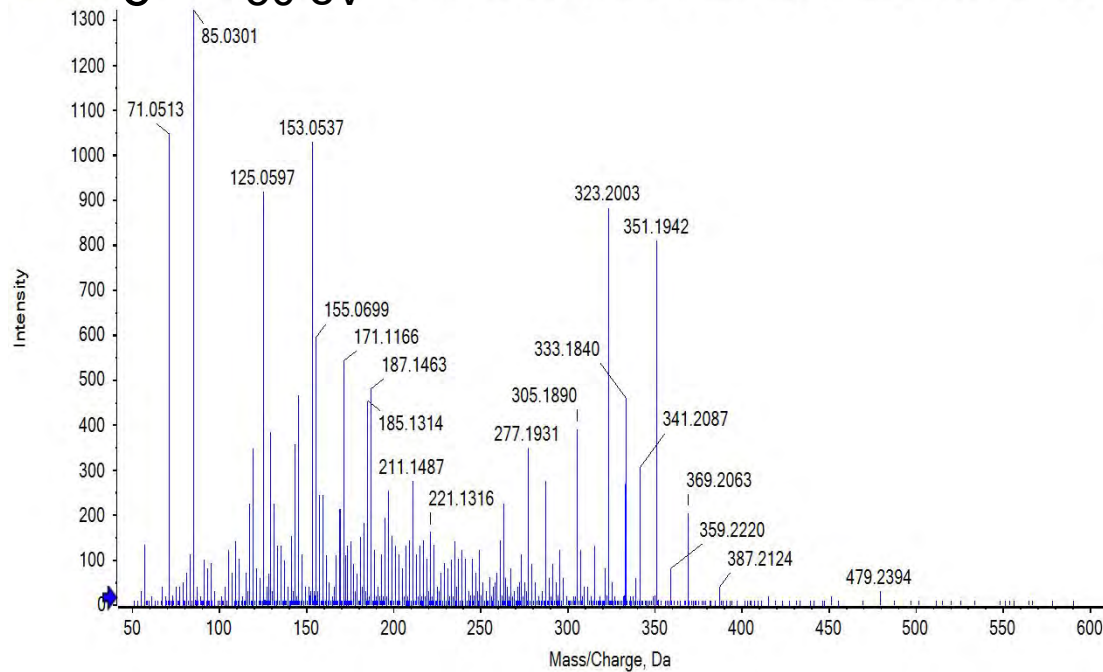

**d** CES

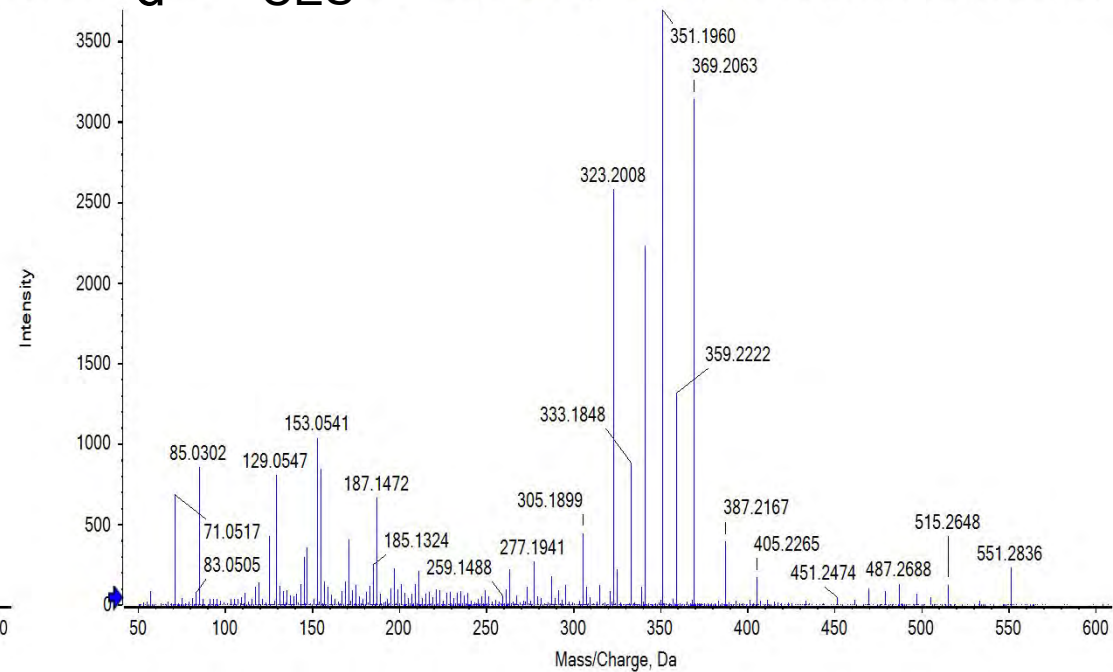

# 29. 14-Anisoylaconine

**a** 20 eV

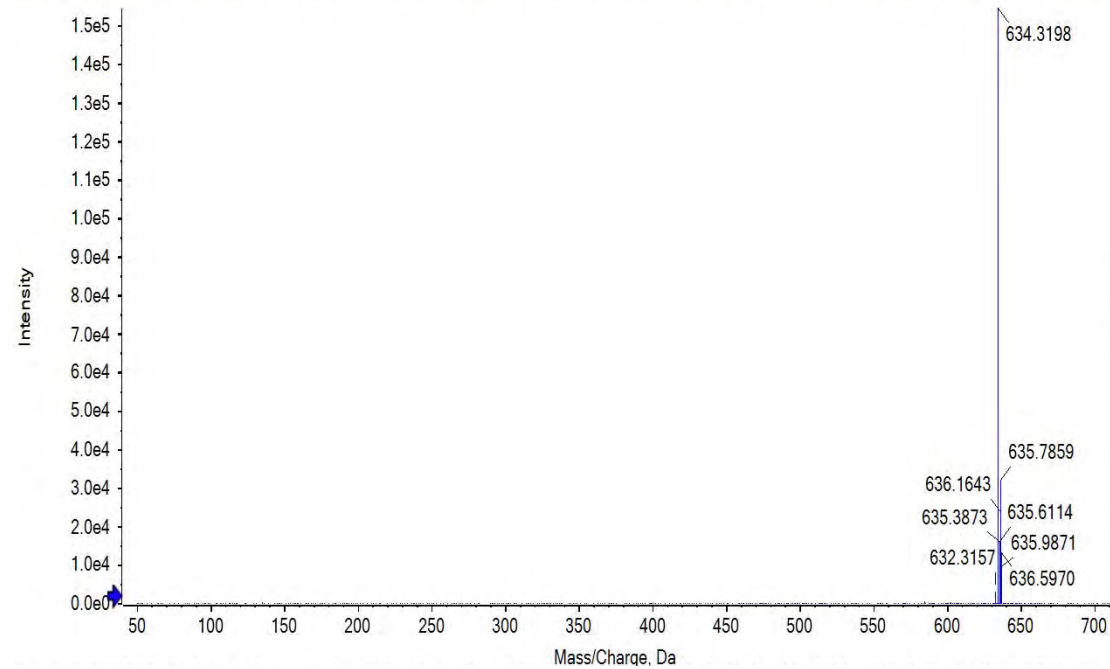

**b** 35eV

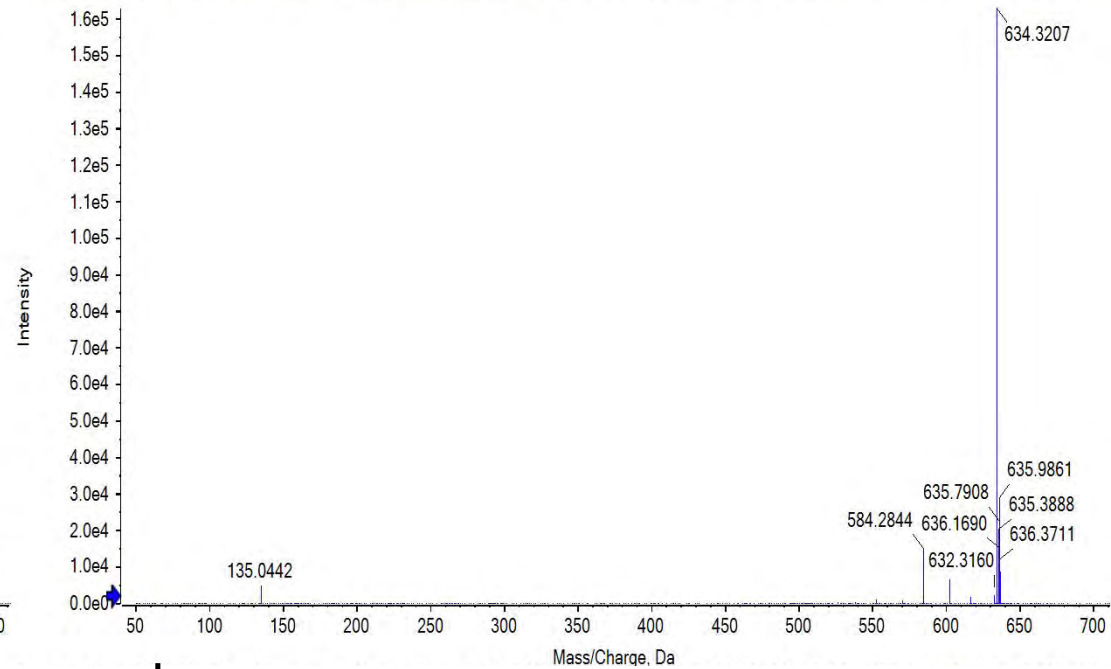

**c** 50 eV

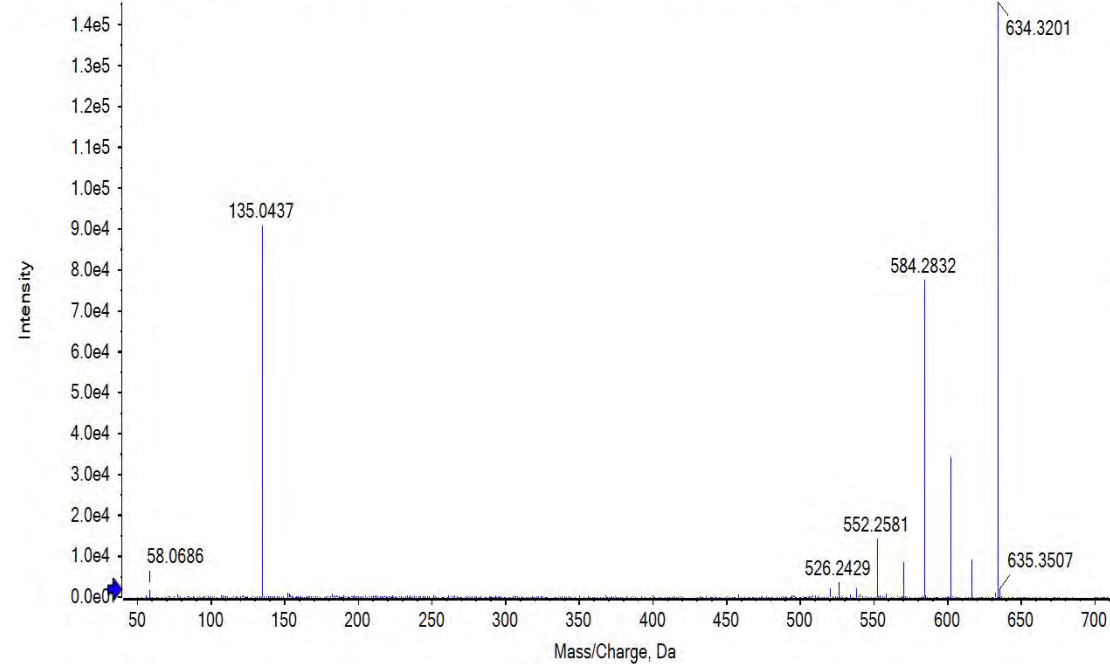

**d** CES

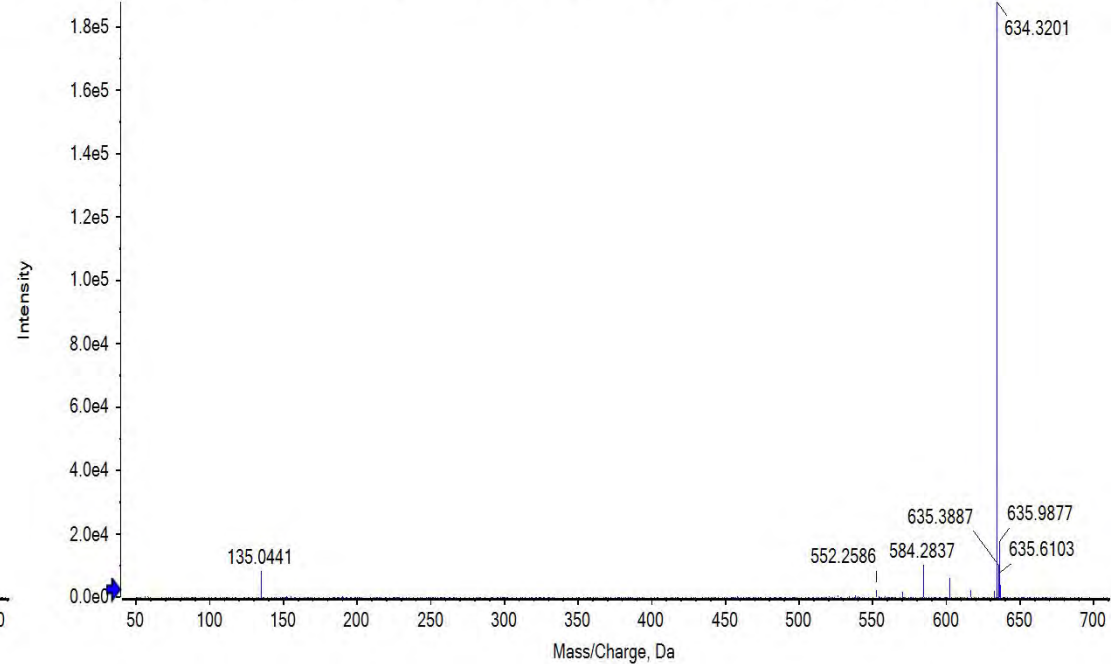

# 30. Aflatoxin B2

**a** 20 eV

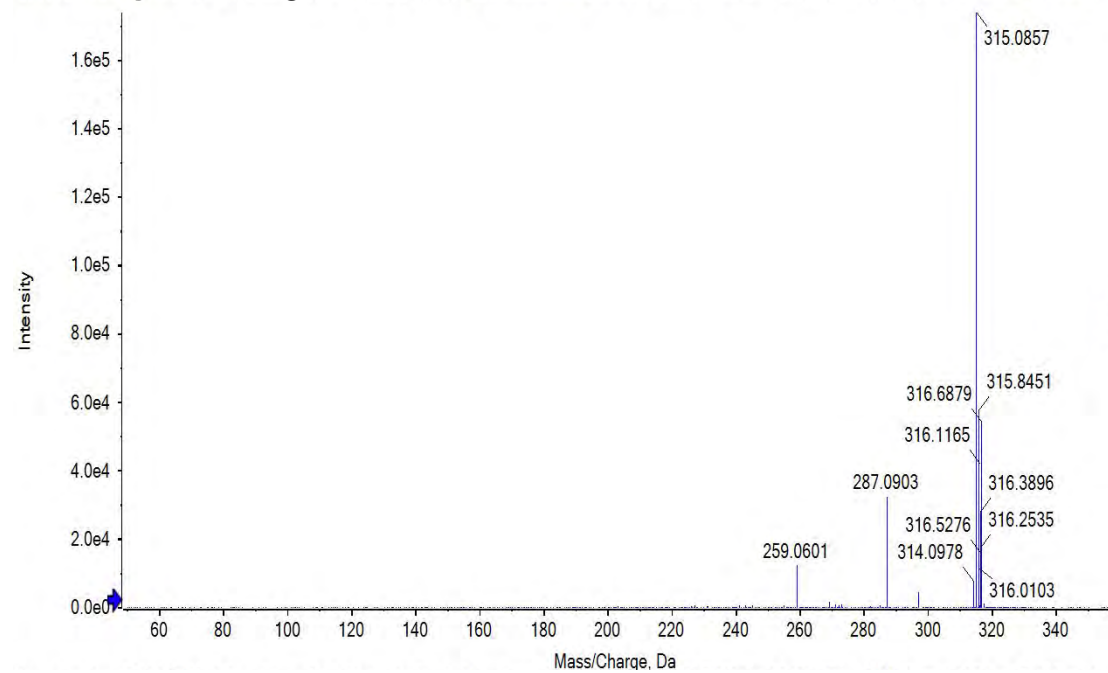

**b** 35eV

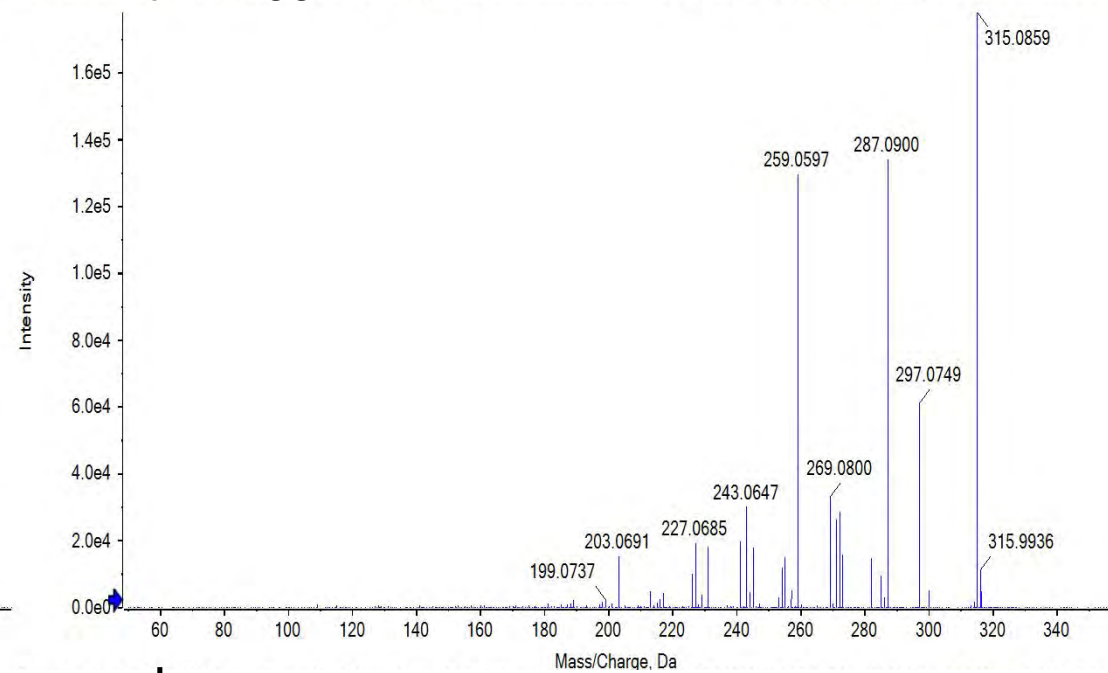

**c** 50 eV

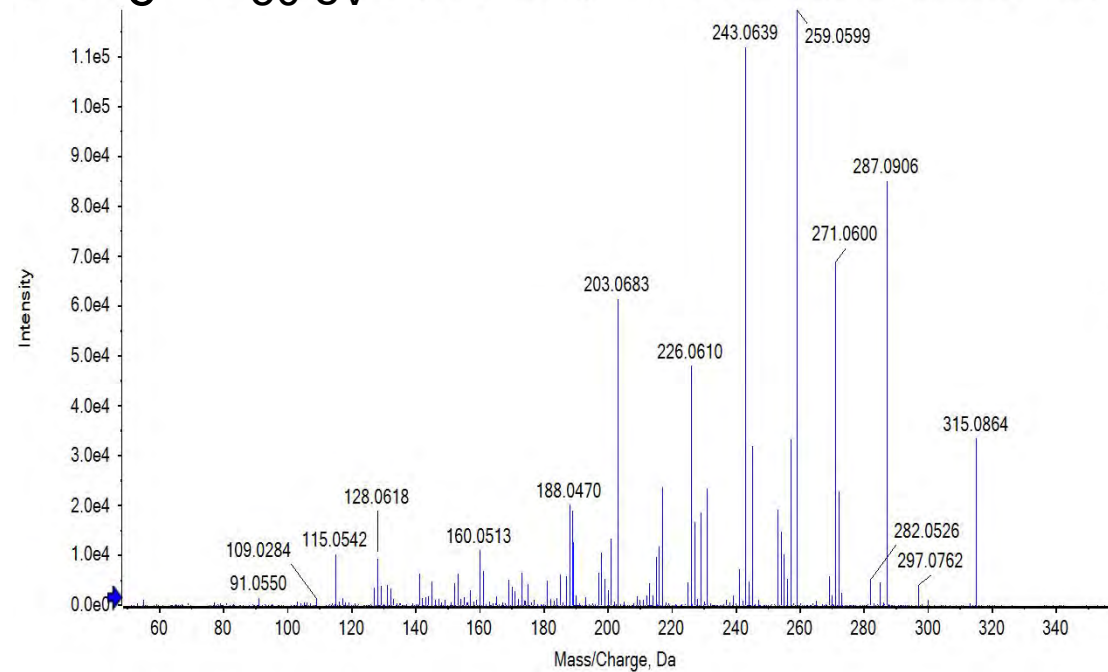

**d** CES

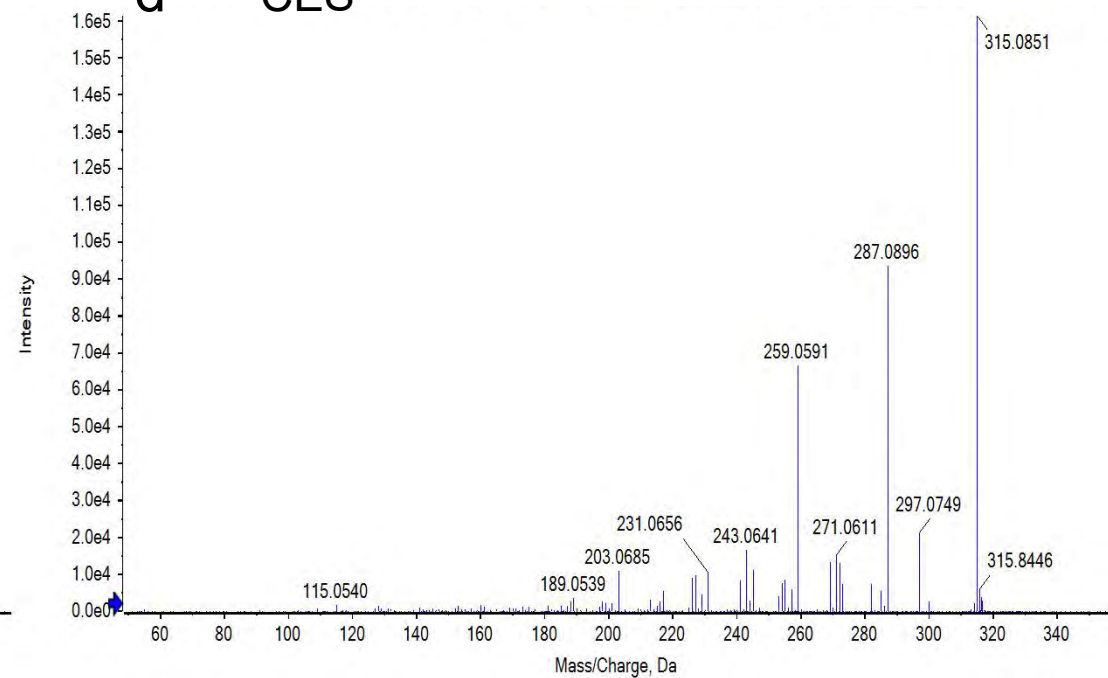



# 32. Colchicine

**a** 20 eV

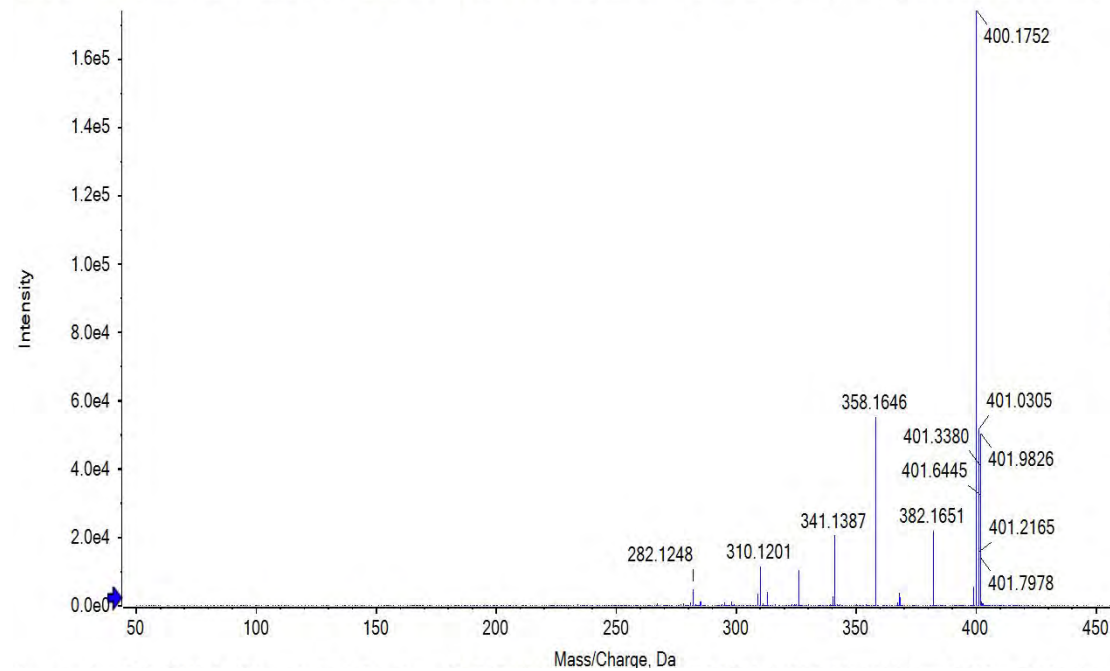

**b** 35eV

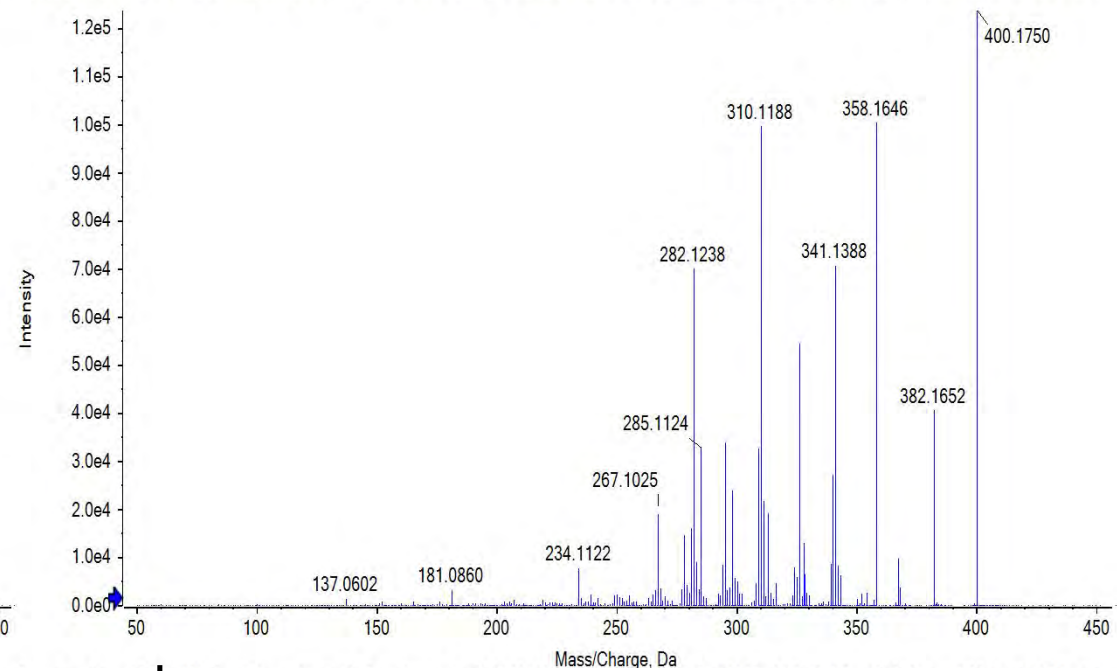

**c** 50 eV

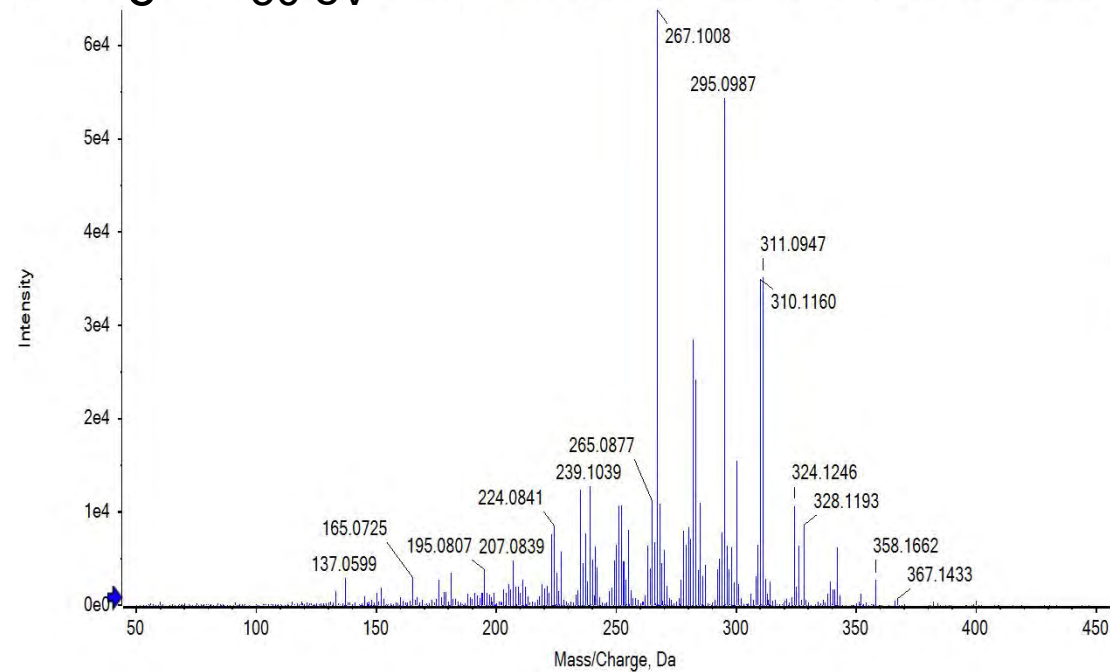

**d** CES

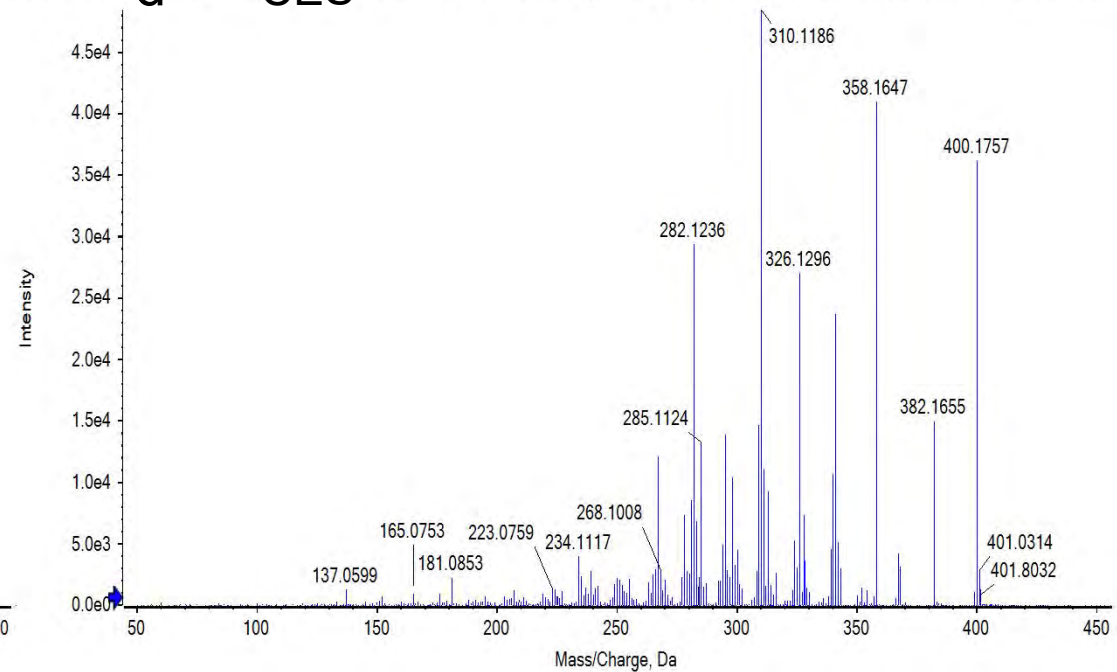



# 33. Veratramine

**a** 20 eV

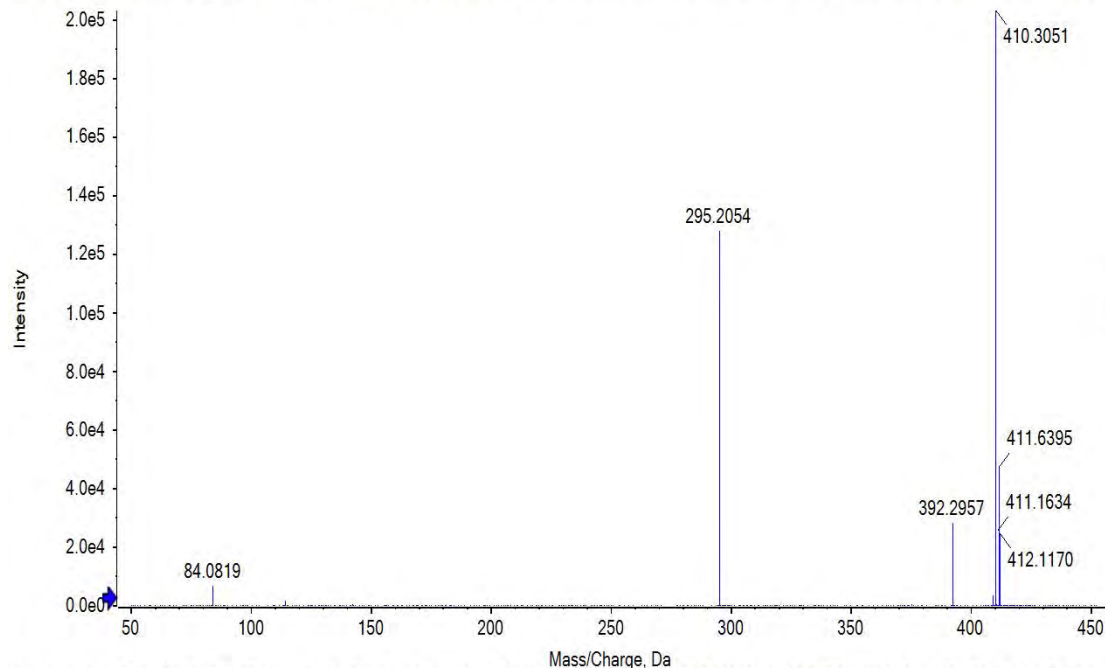

**b** 35eV

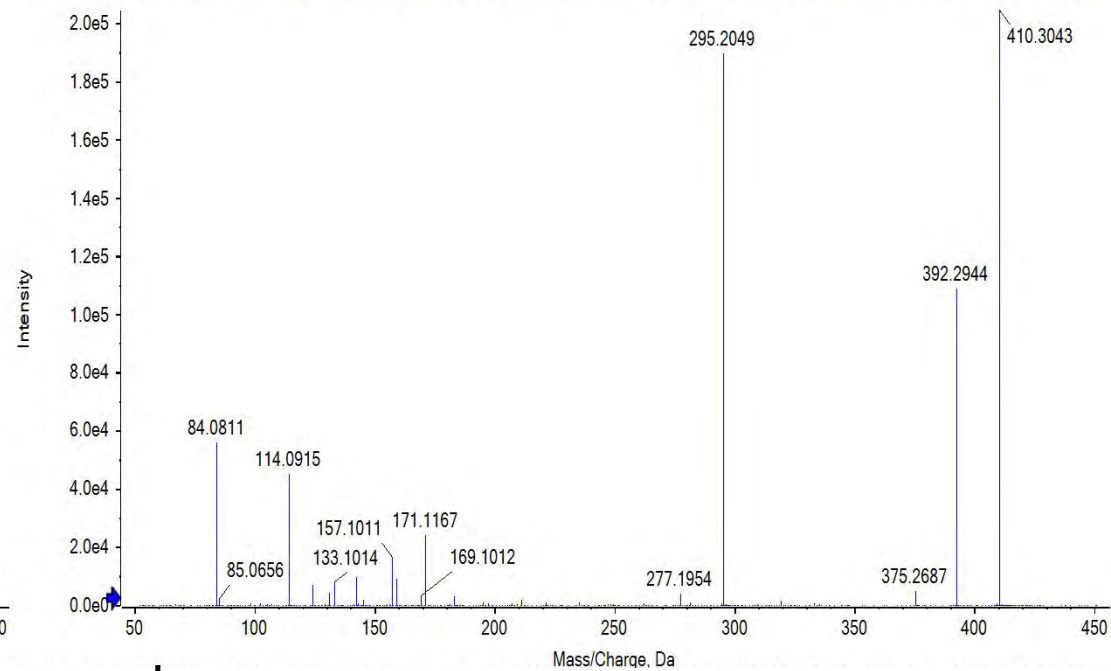

**c** 50 eV

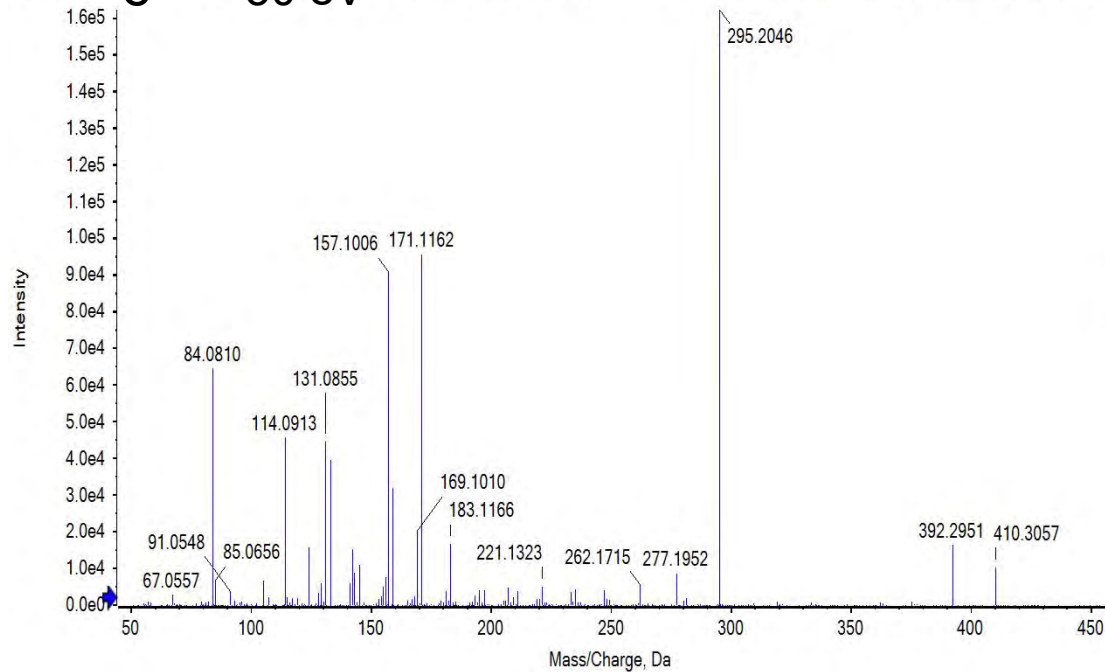

**d** CES

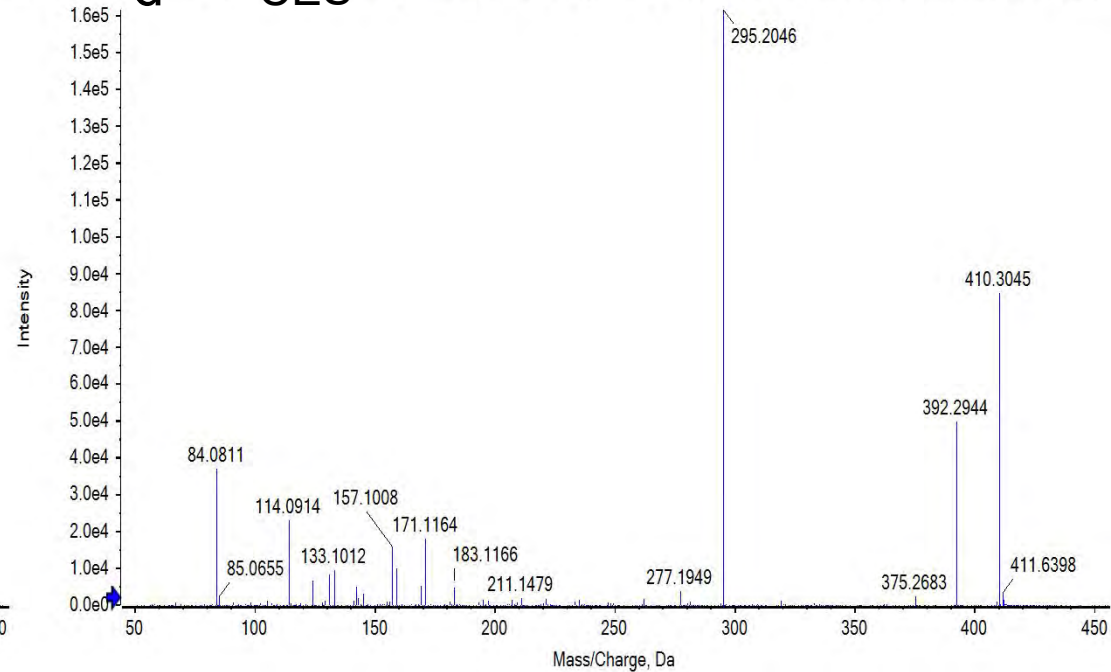

# 34. Jervine

**a** 20 eV

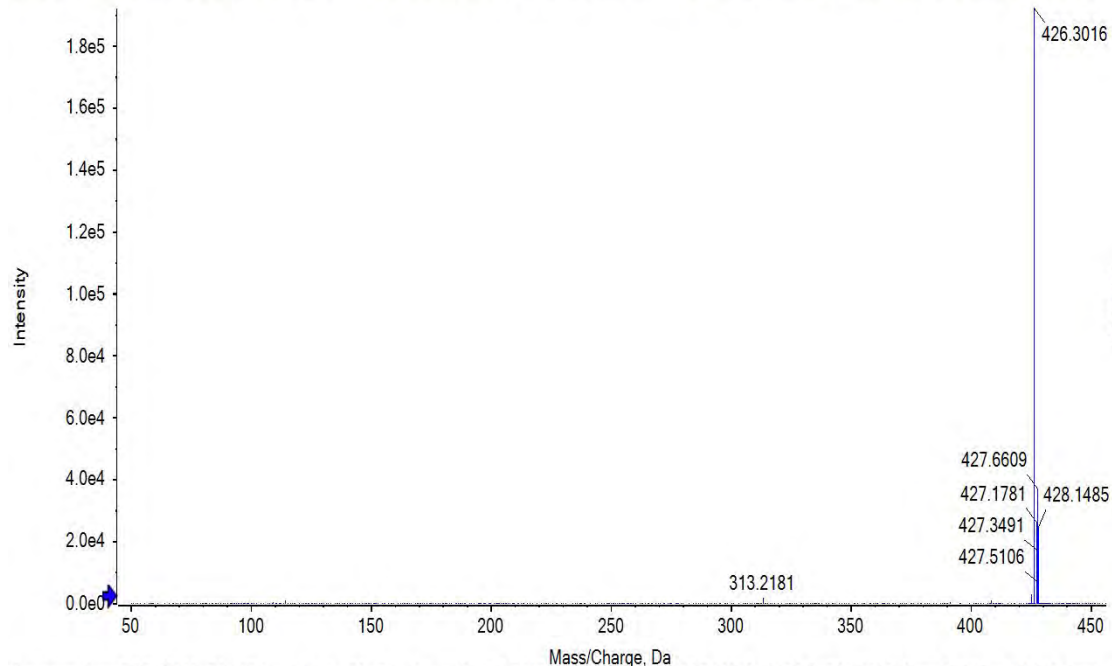

**b** 35eV

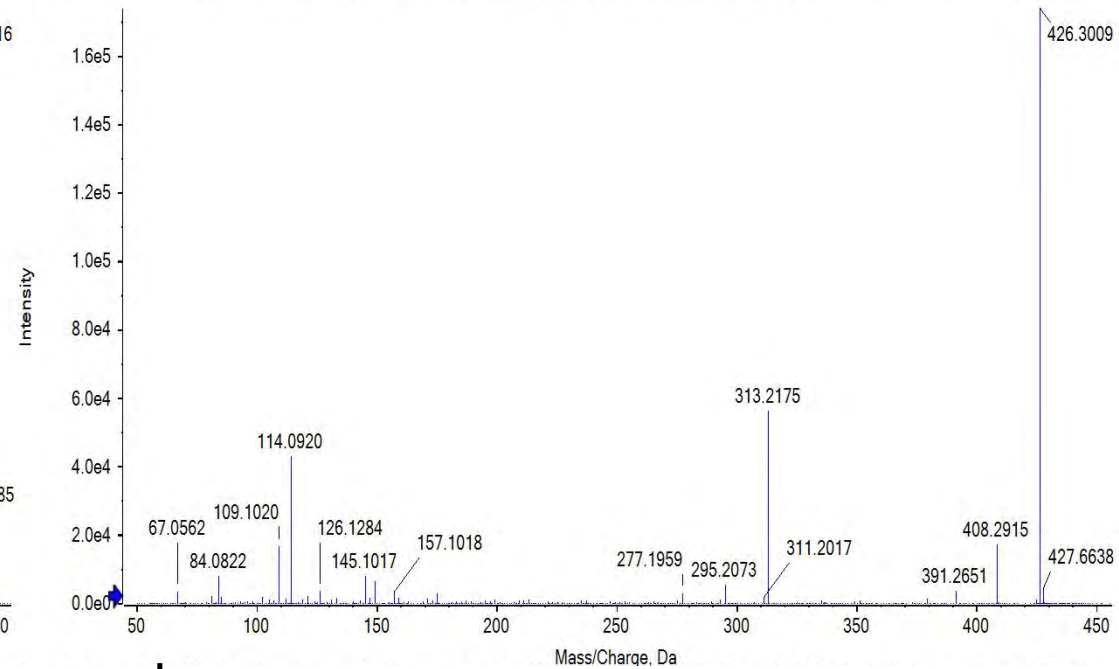

**c** 50 eV

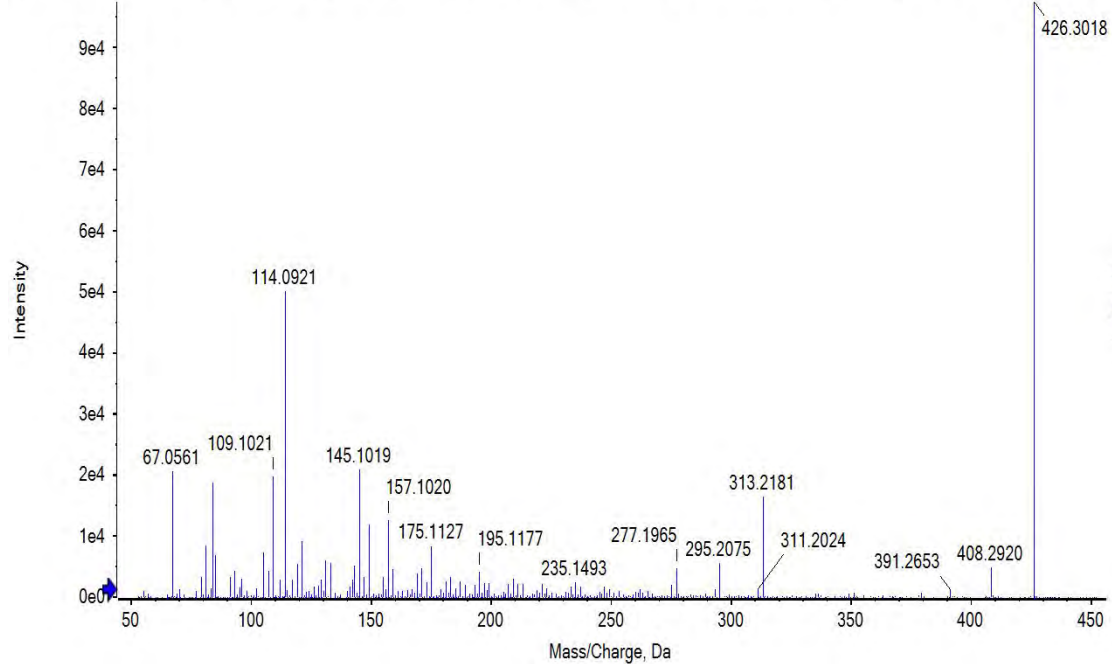

**d** CES

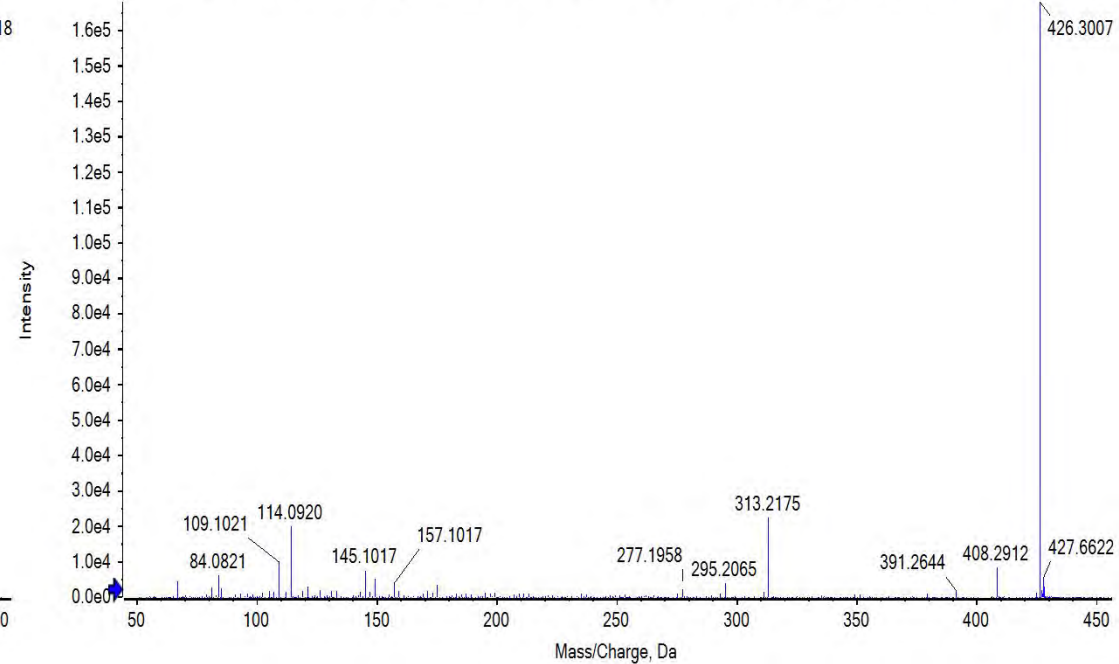

# 35. Batrachotoxin

**a** 20 eV

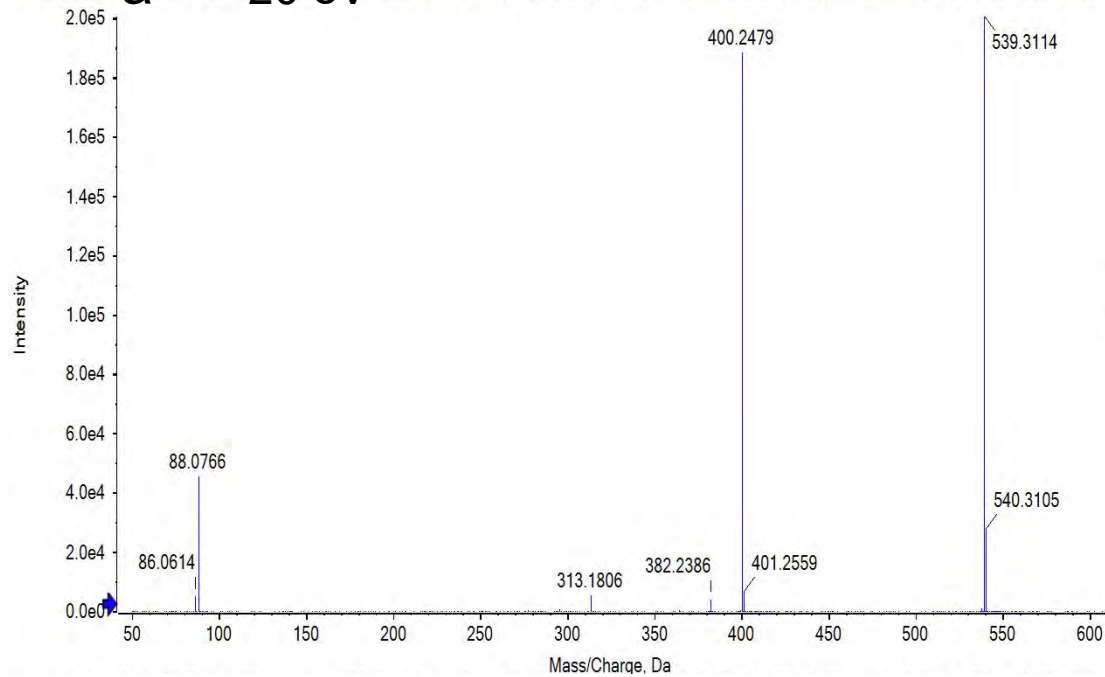

**b** 35eV

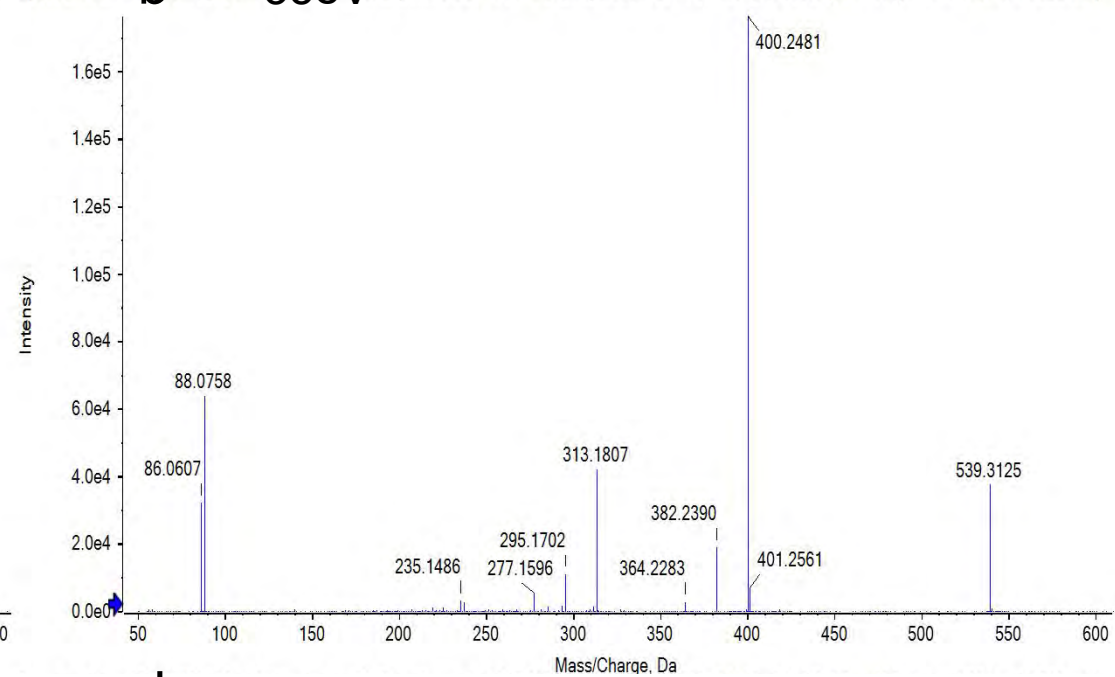

**c** 50 eV

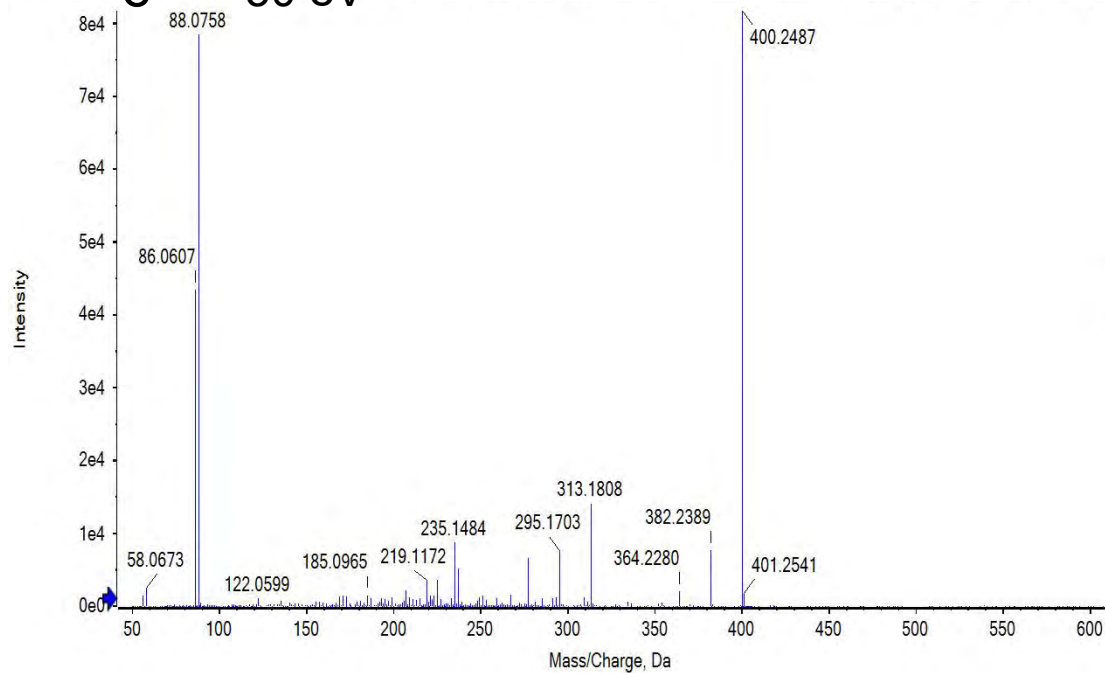

**d** CES

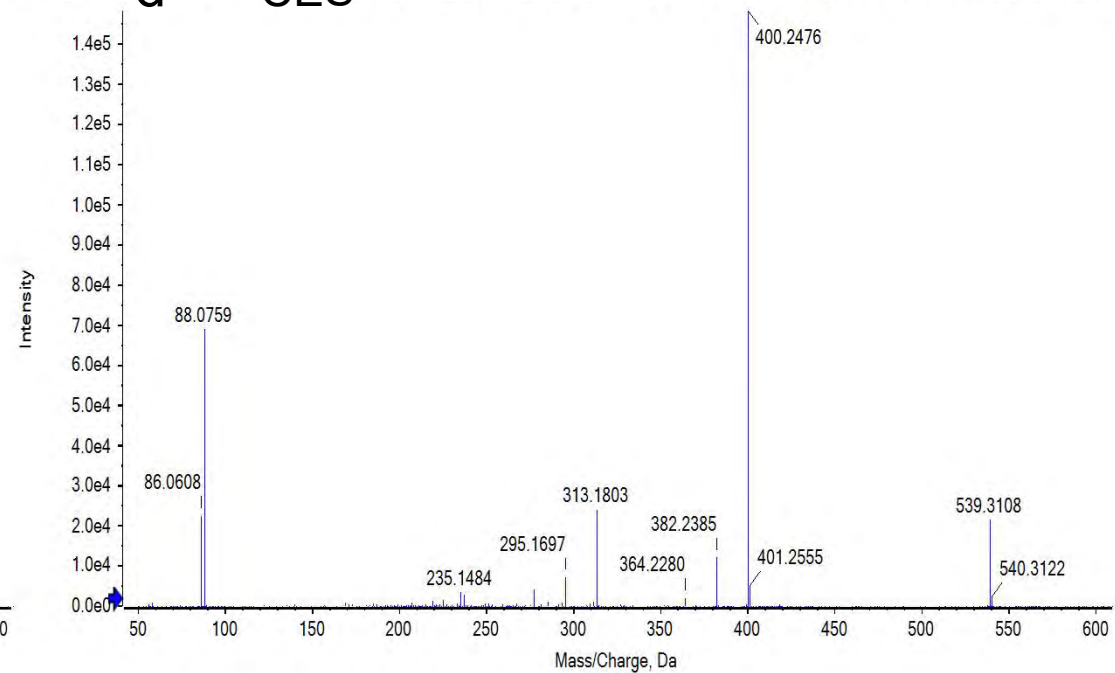

# 36. Digoxin

**a** -20 eV

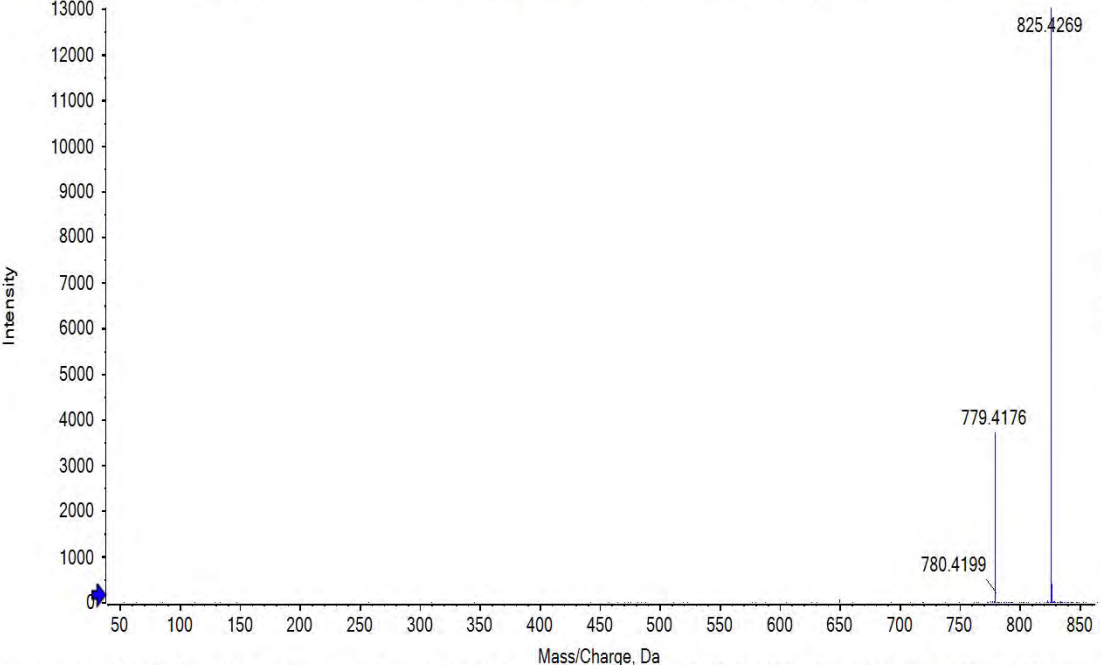

**b** -35eV

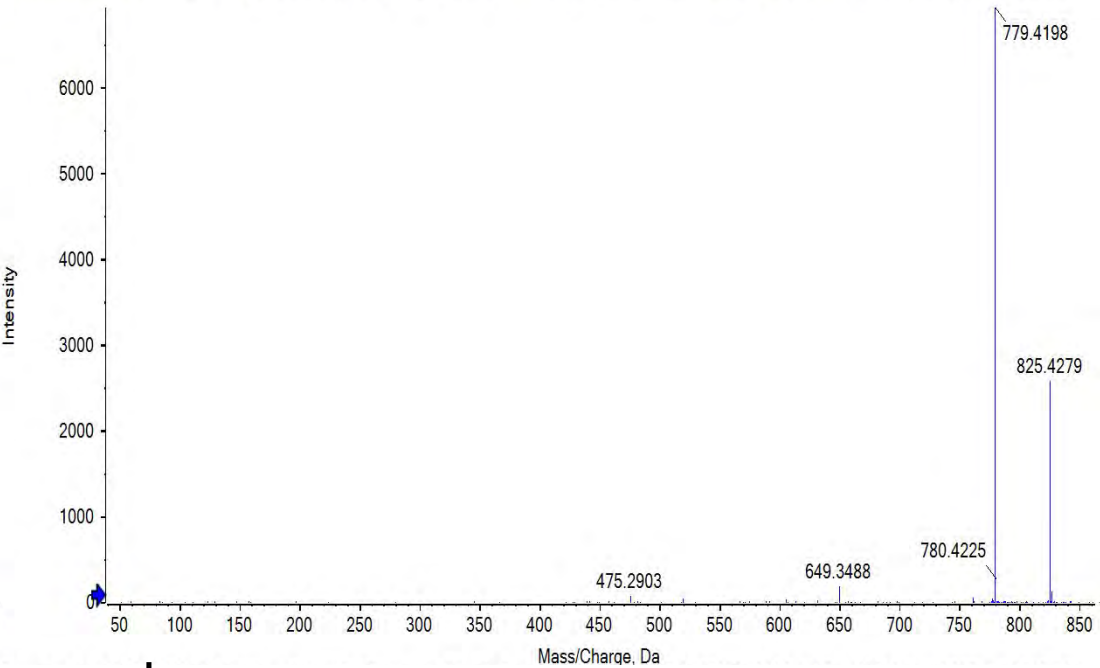

**c** -50 eV

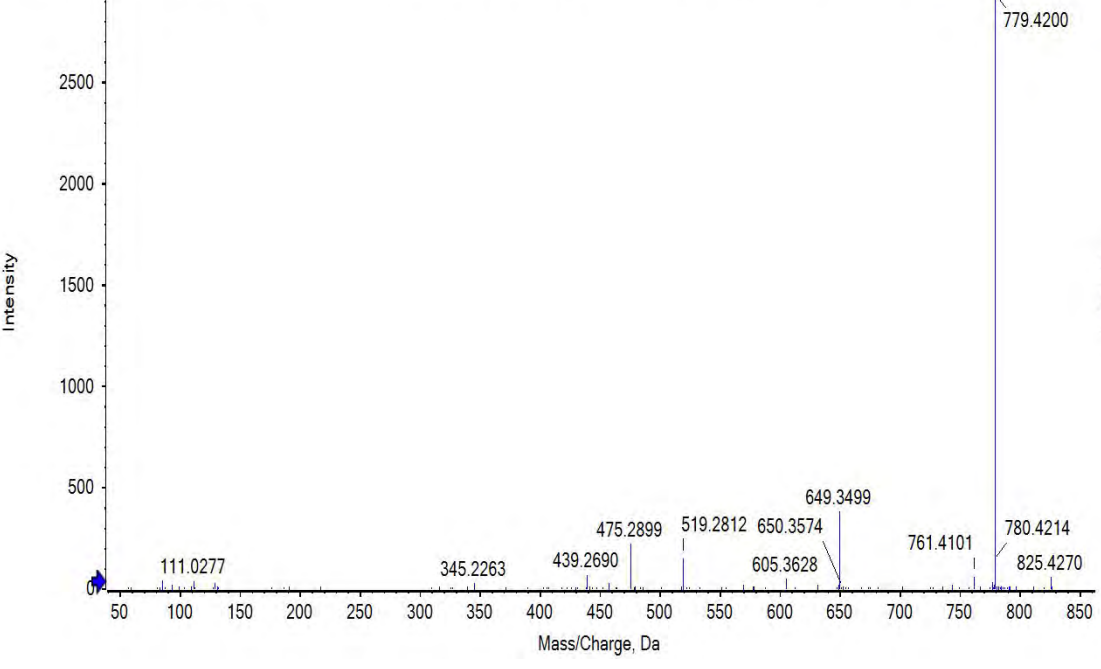

**d** CES

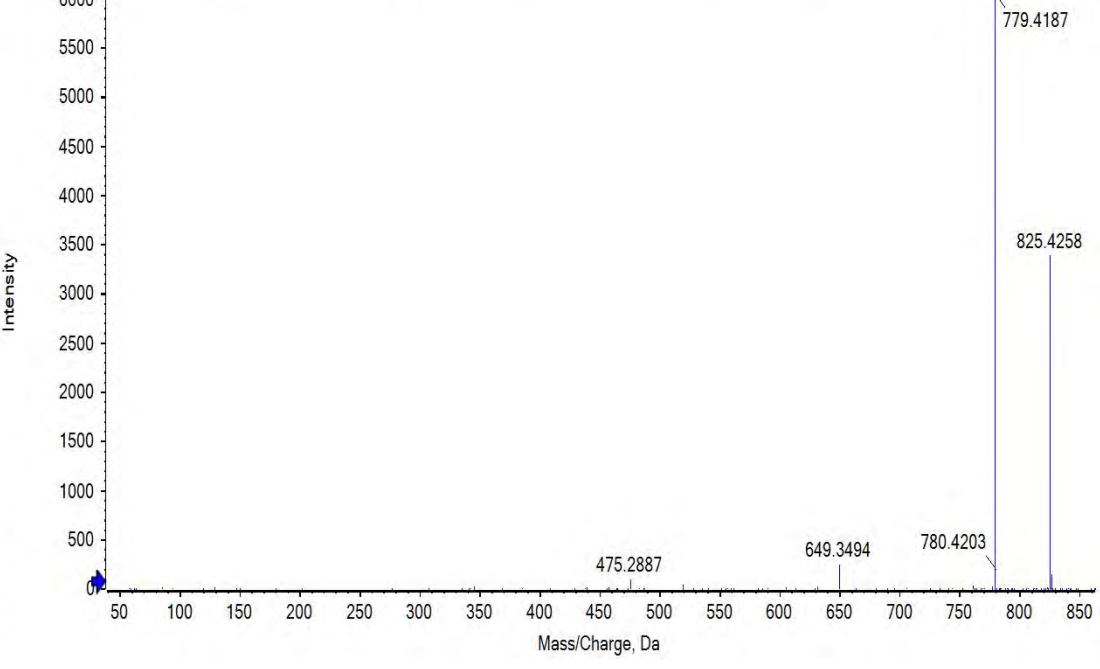

# 37. Aflatoxin B1

**a** 20 eV

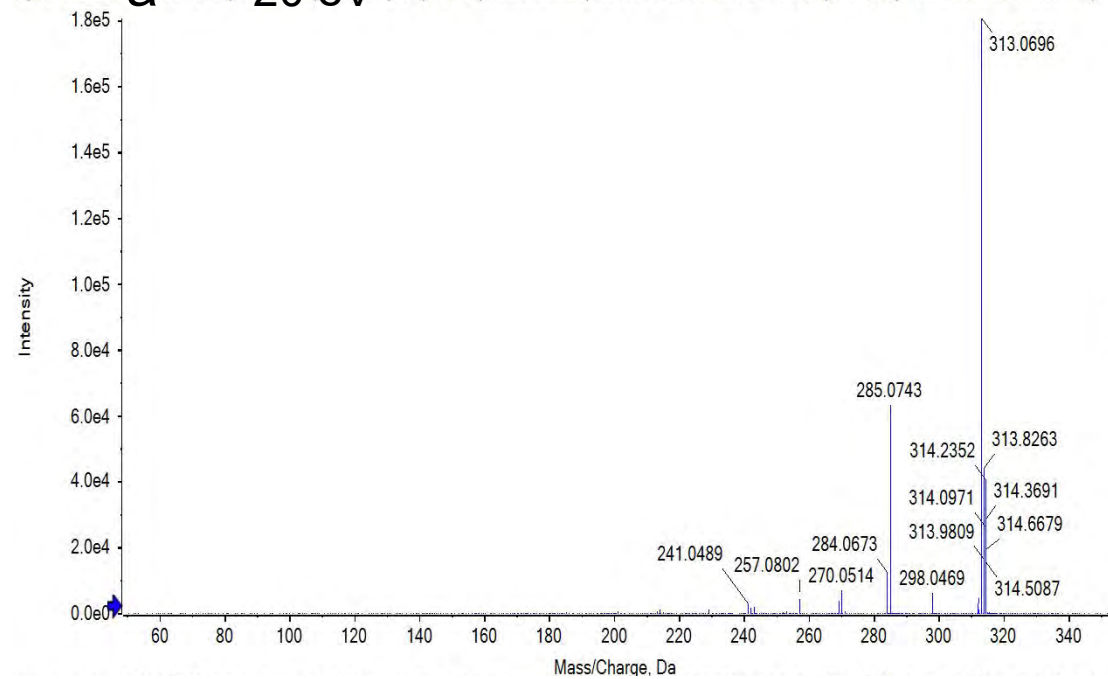

**b** 35eV

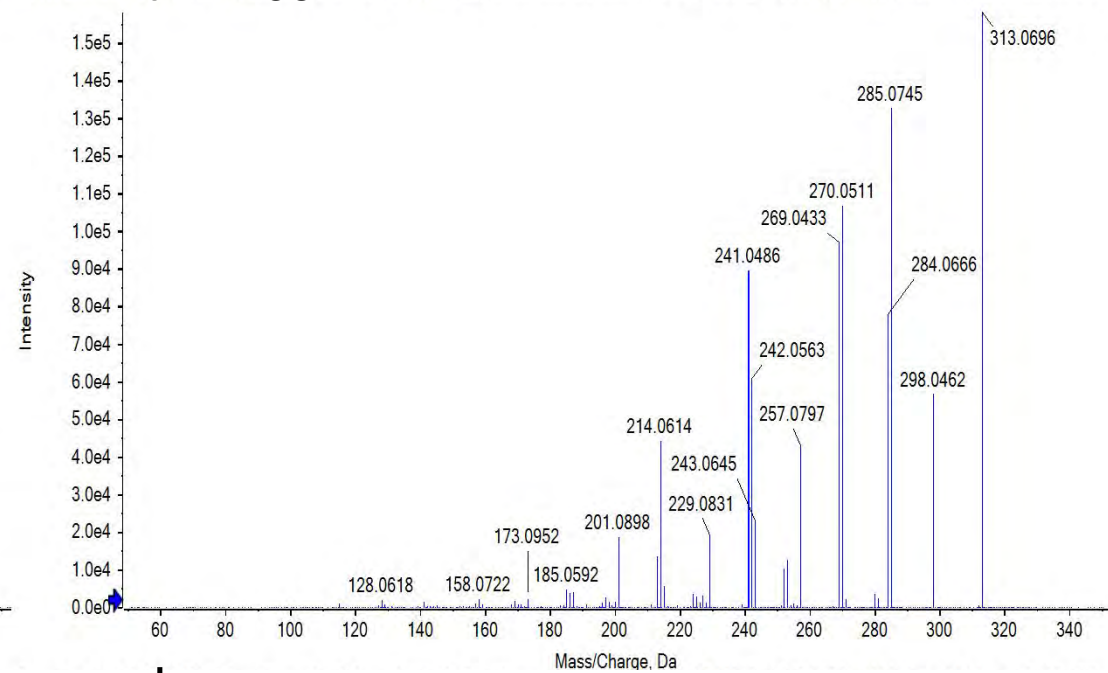

**c** 50 eV

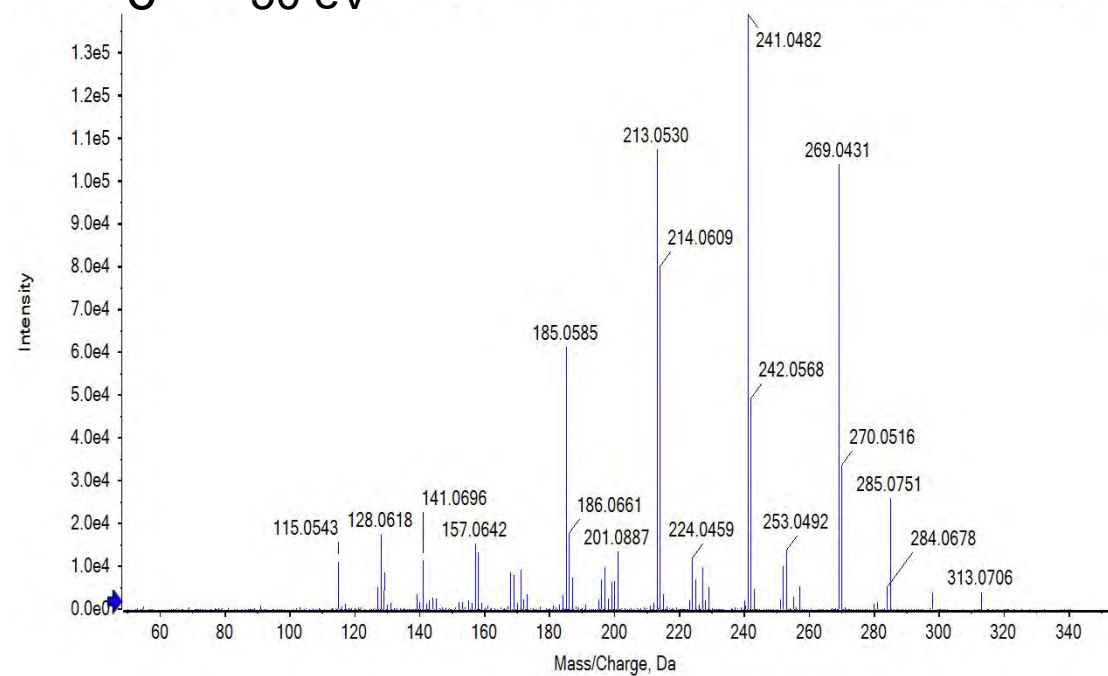

**d** CES

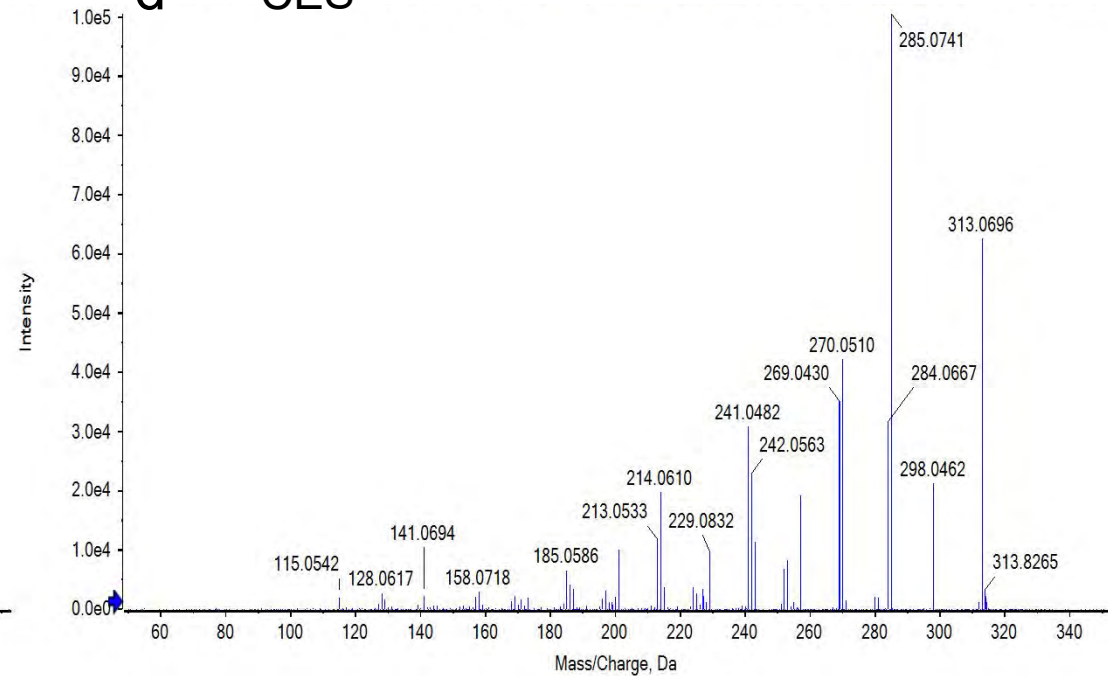

# 38. Hypaconitine

**a** 20 eV

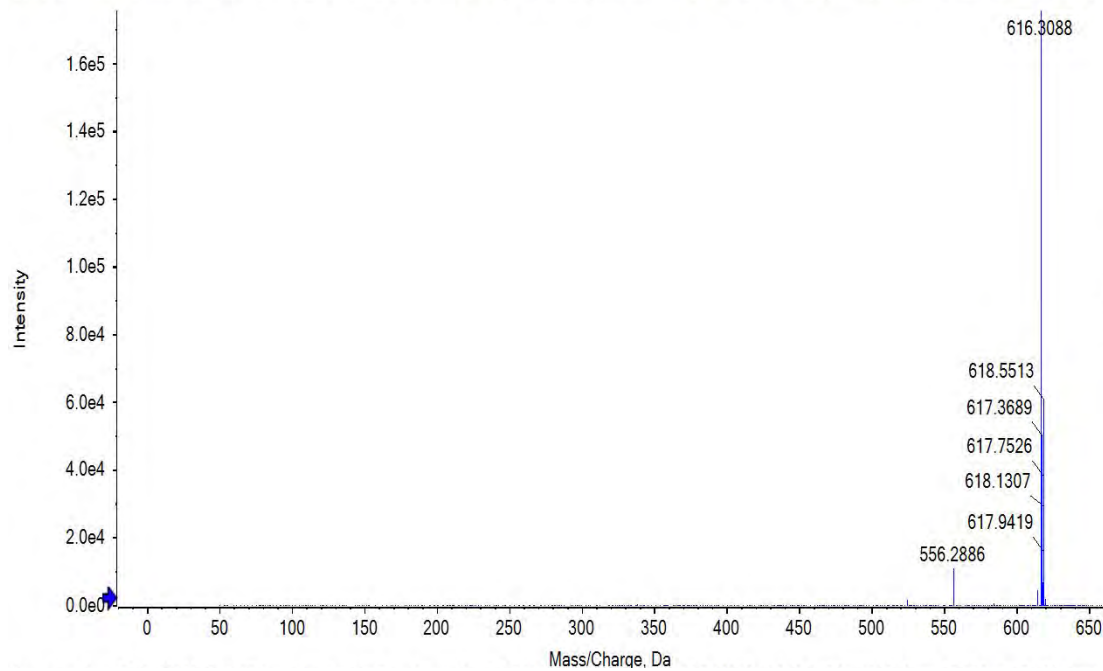

**b** 35eV

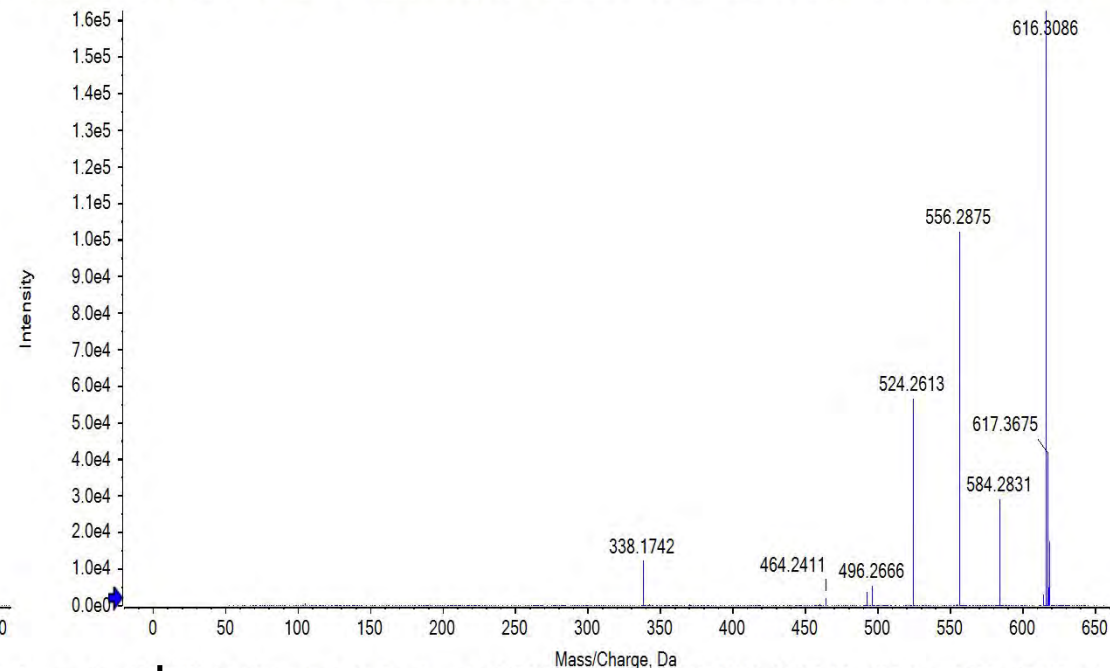

**c** 50 eV

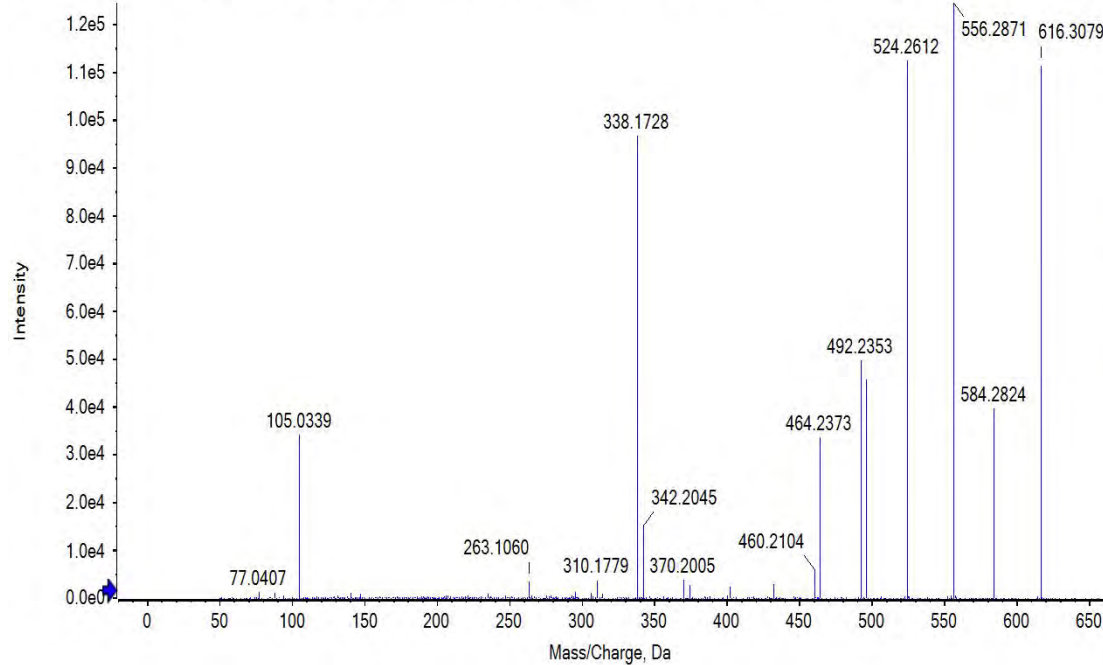

**d** CES

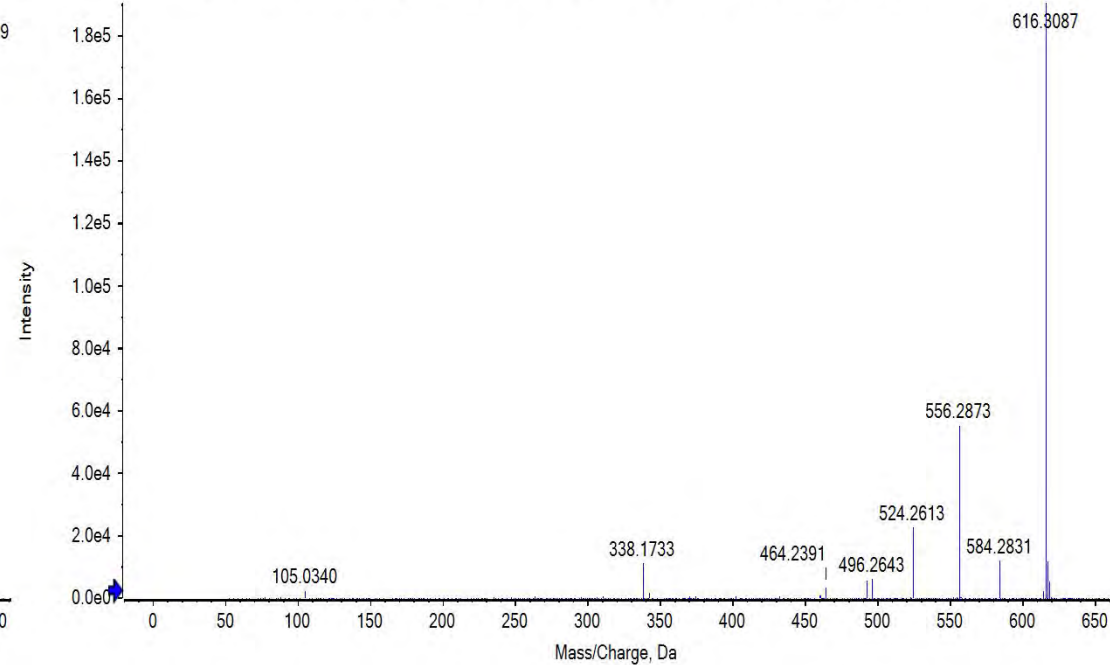

# 39. Cyclophamine

**a** 20 eV

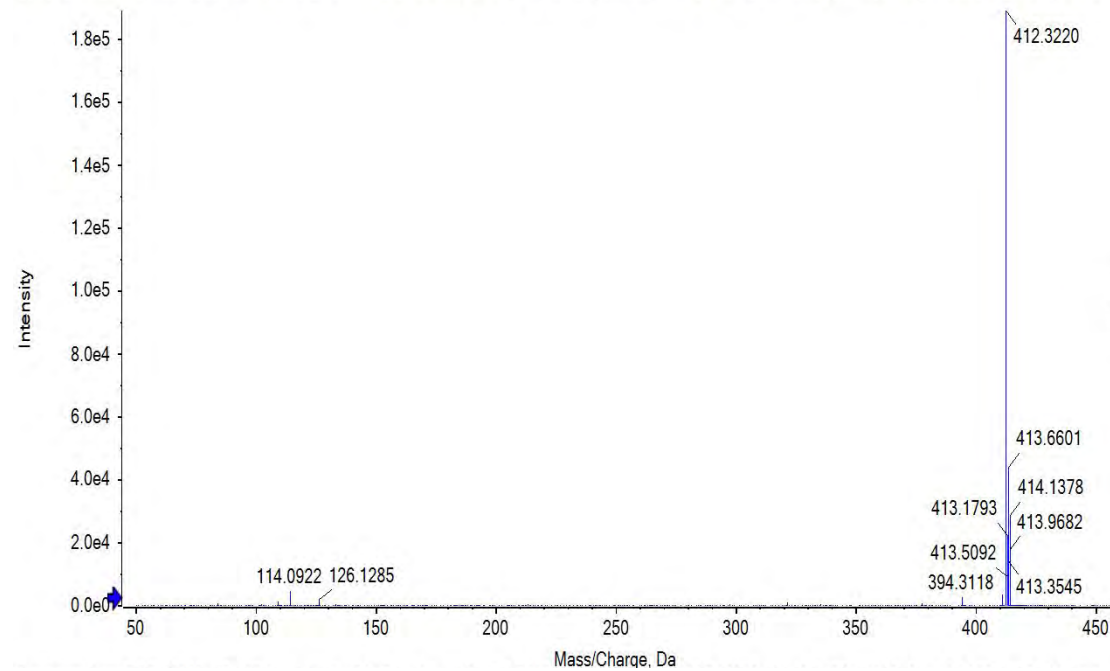

**b** 35eV

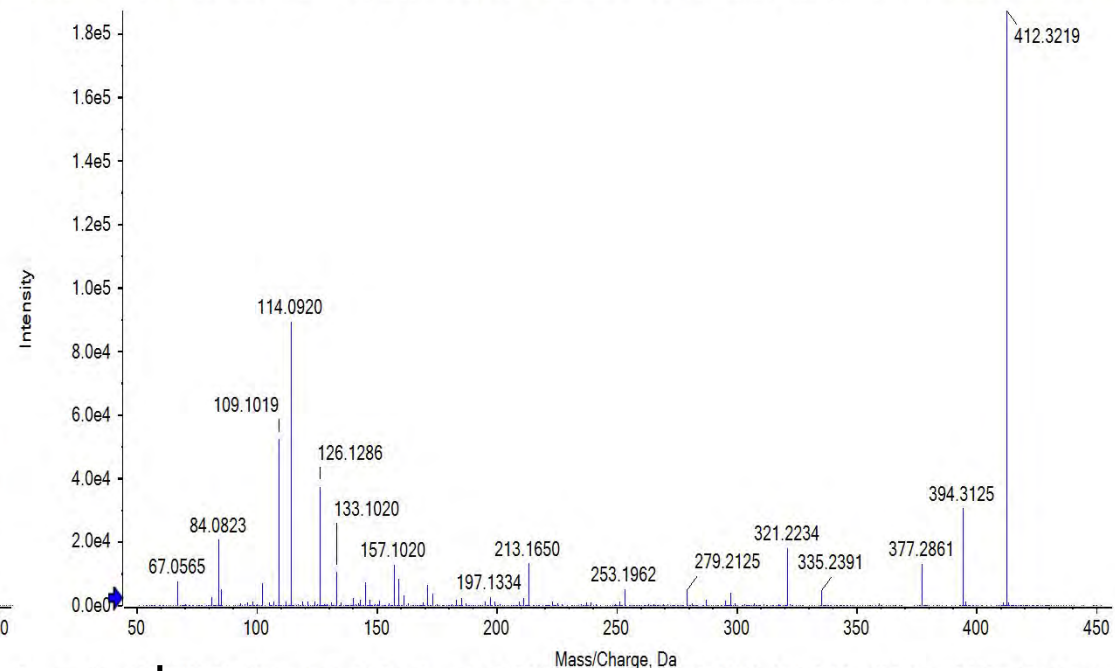

**c** 50 eV

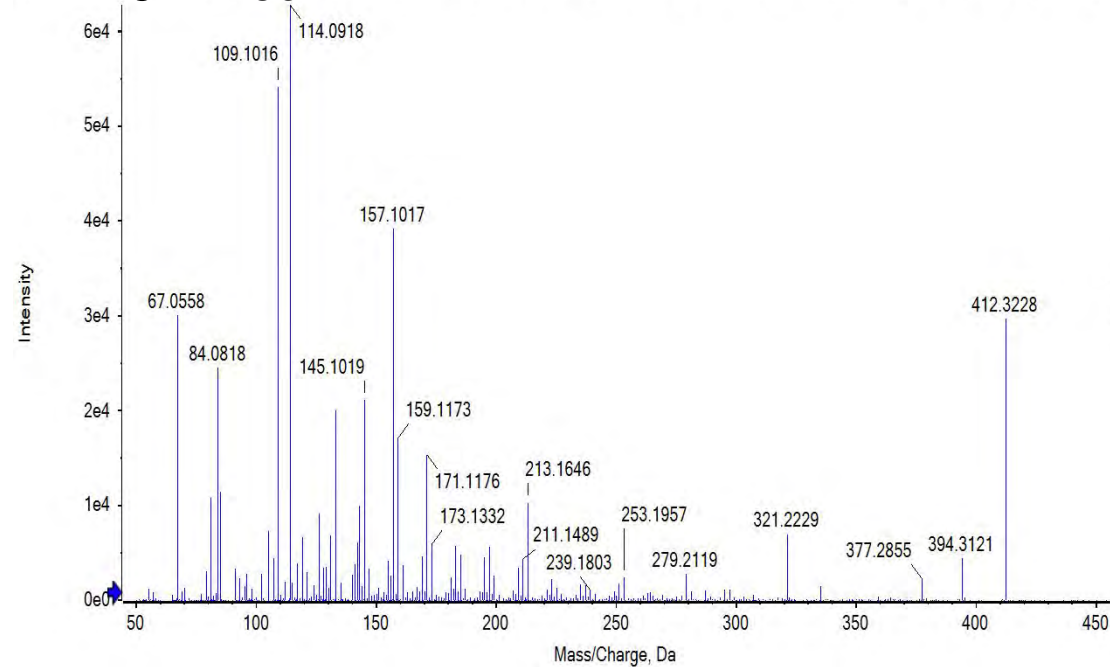

**d** CES

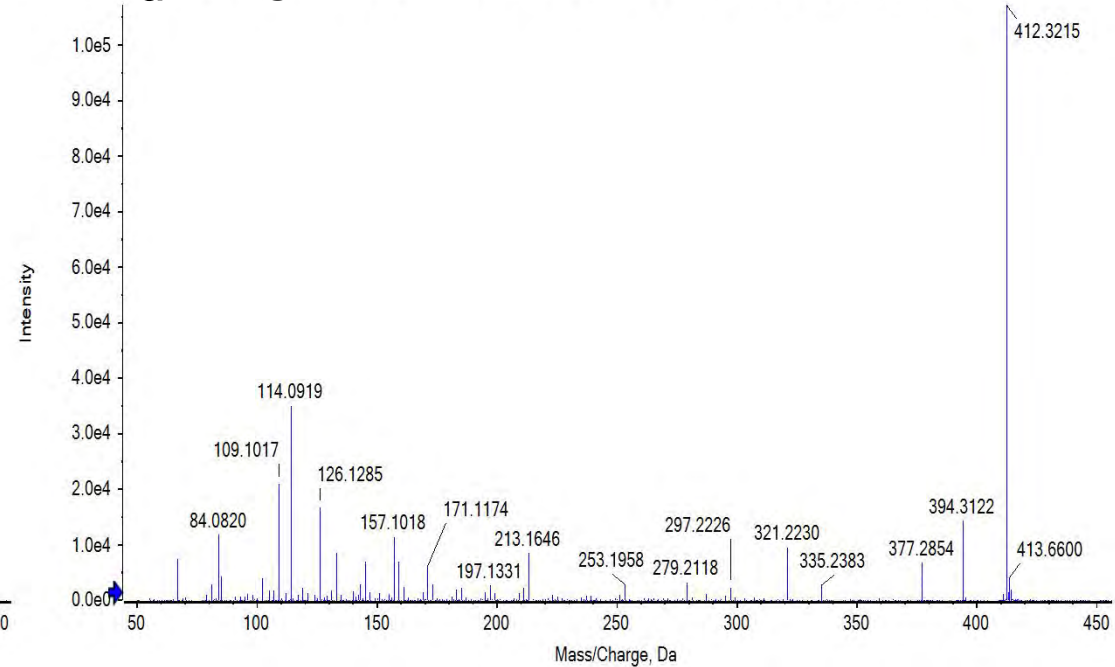

# 40. Mesaconitine

**a** 20 eV

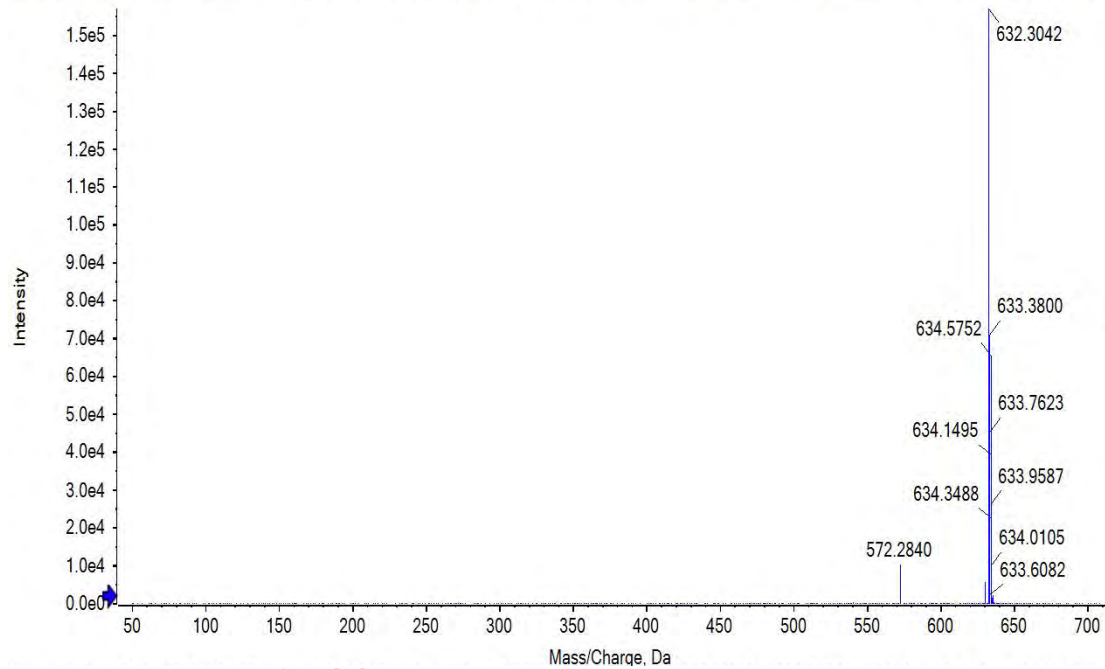

**b** 35eV

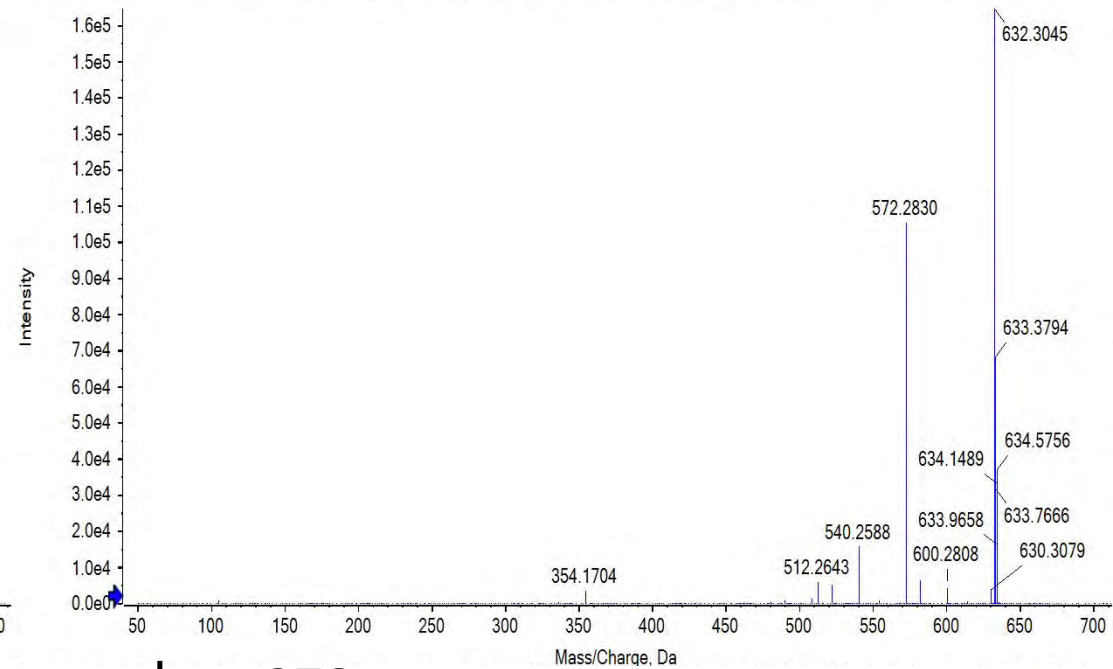

**c** 50 eV

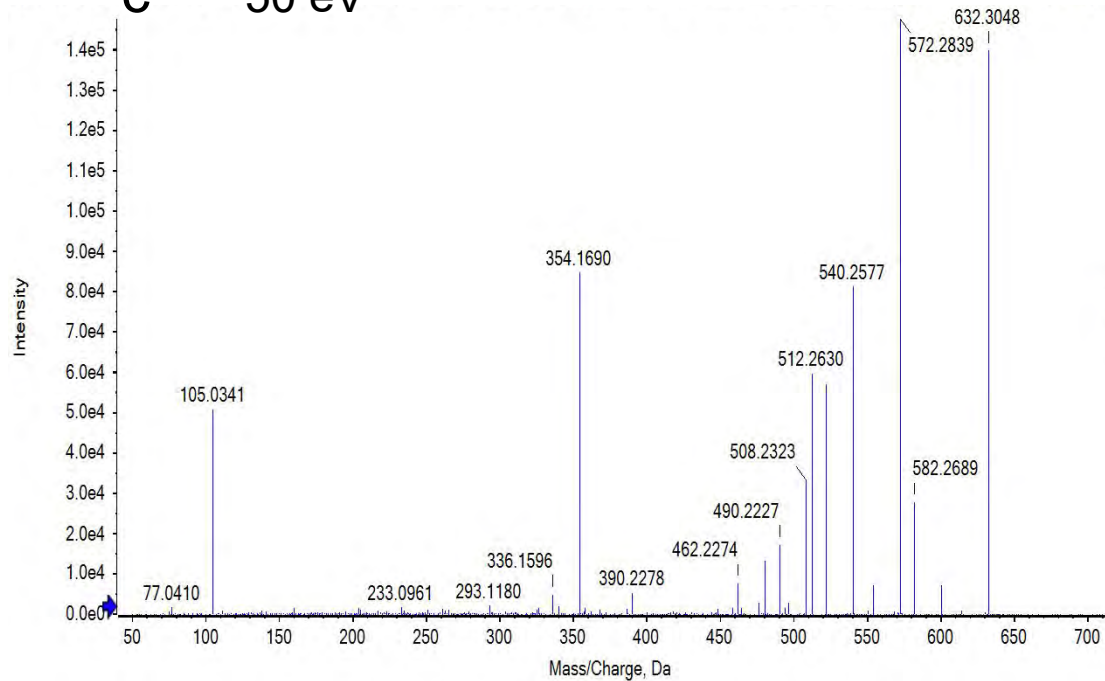

**d** CES

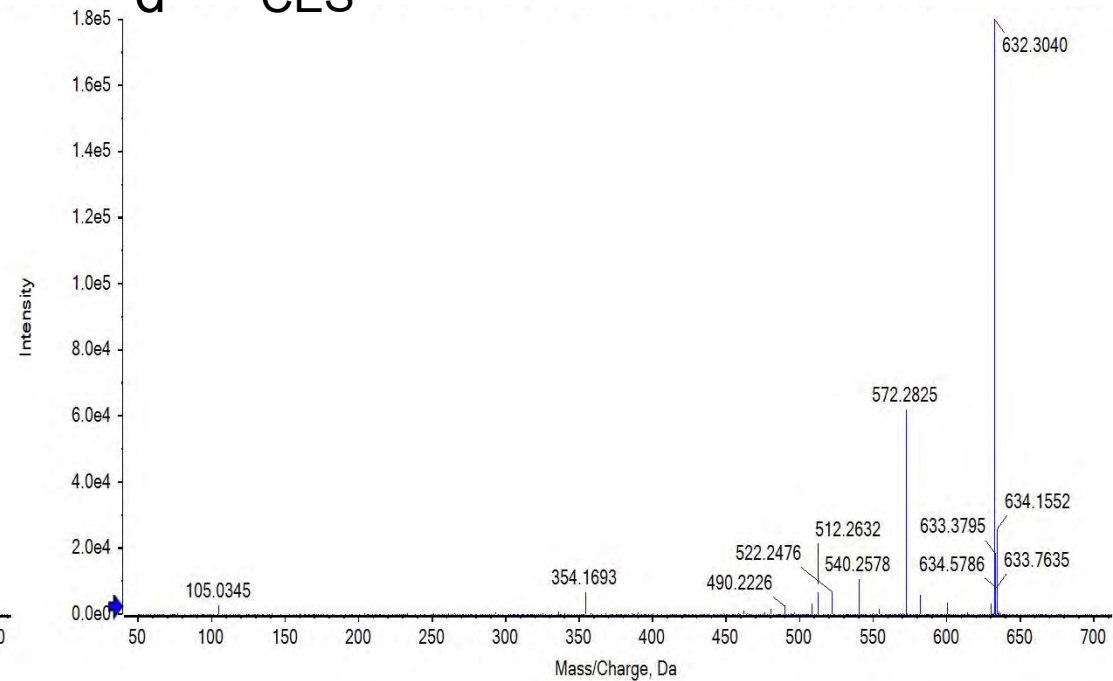



# 41. Aconitine

**a** 20 eV

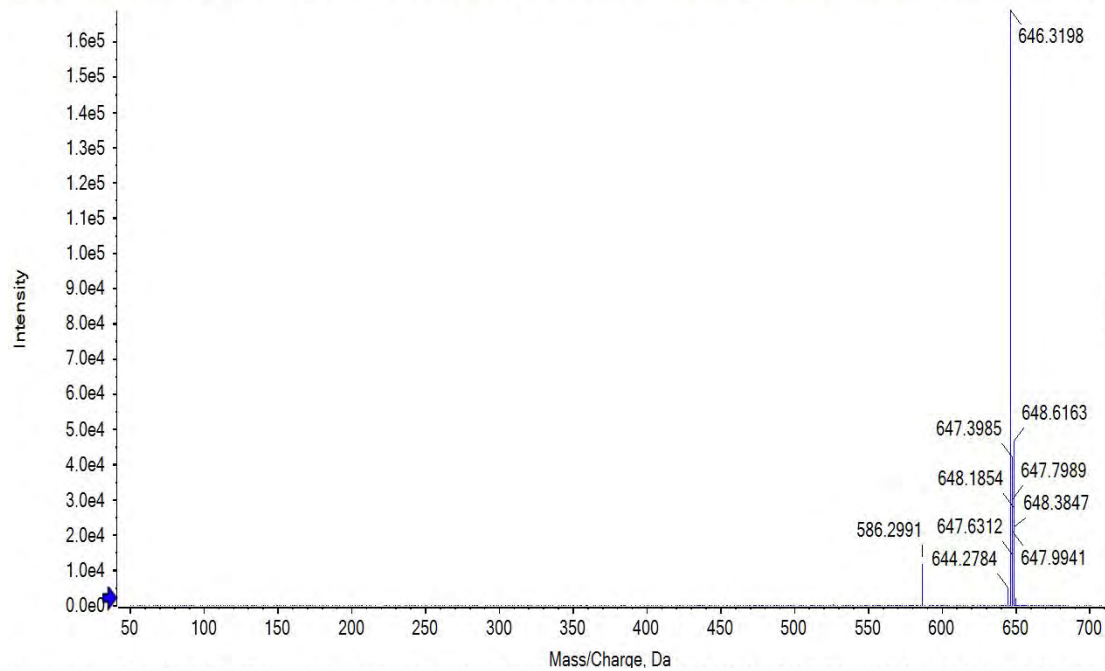

**b** 35eV

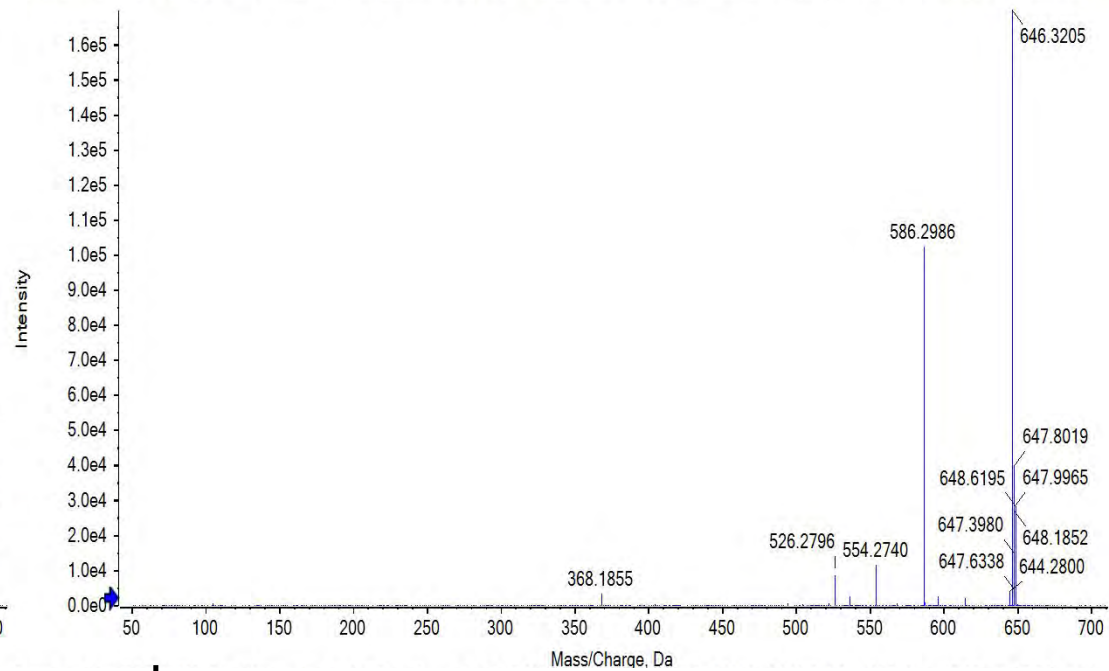

**c** 50 eV

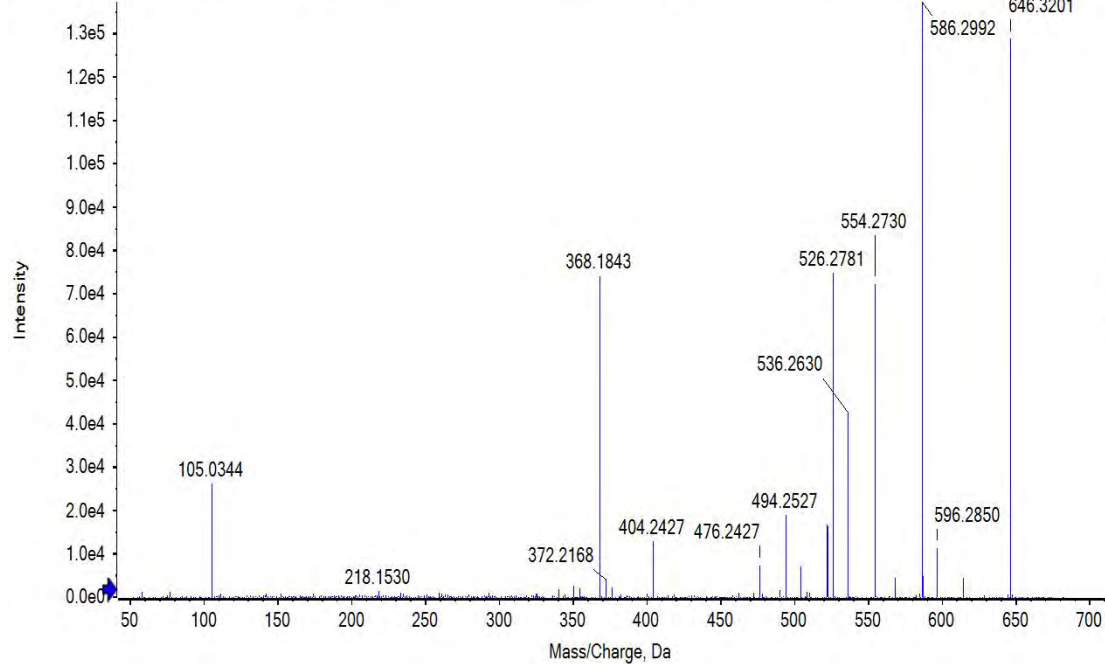

**d** CES

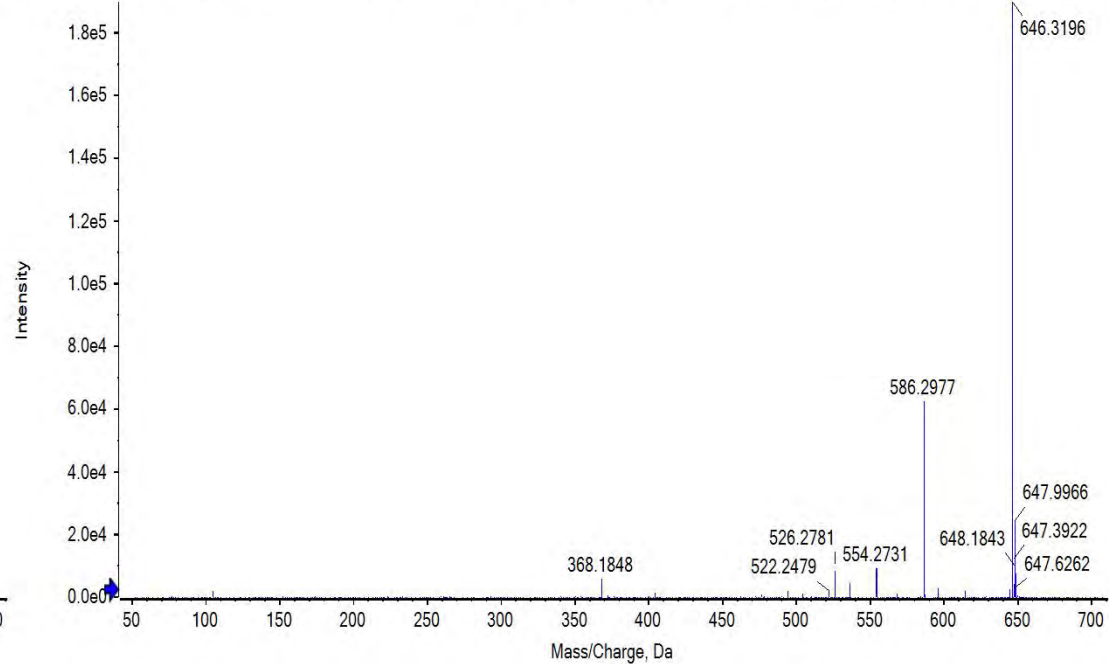

# 42. Jesaconitine

**a** 20 eV

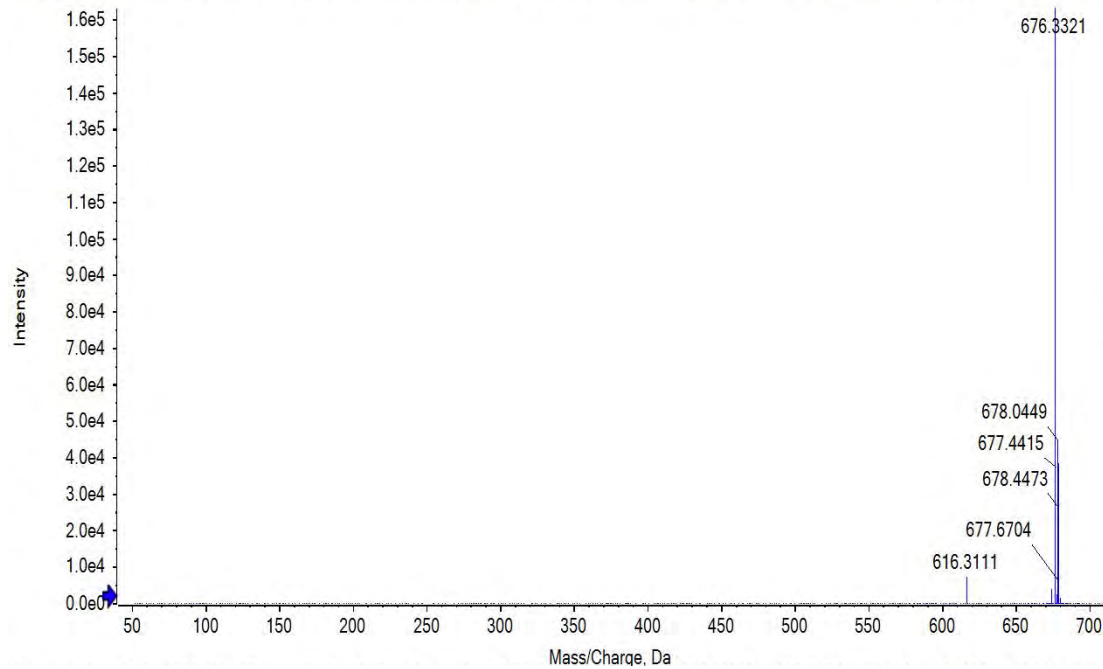

**b** 35eV

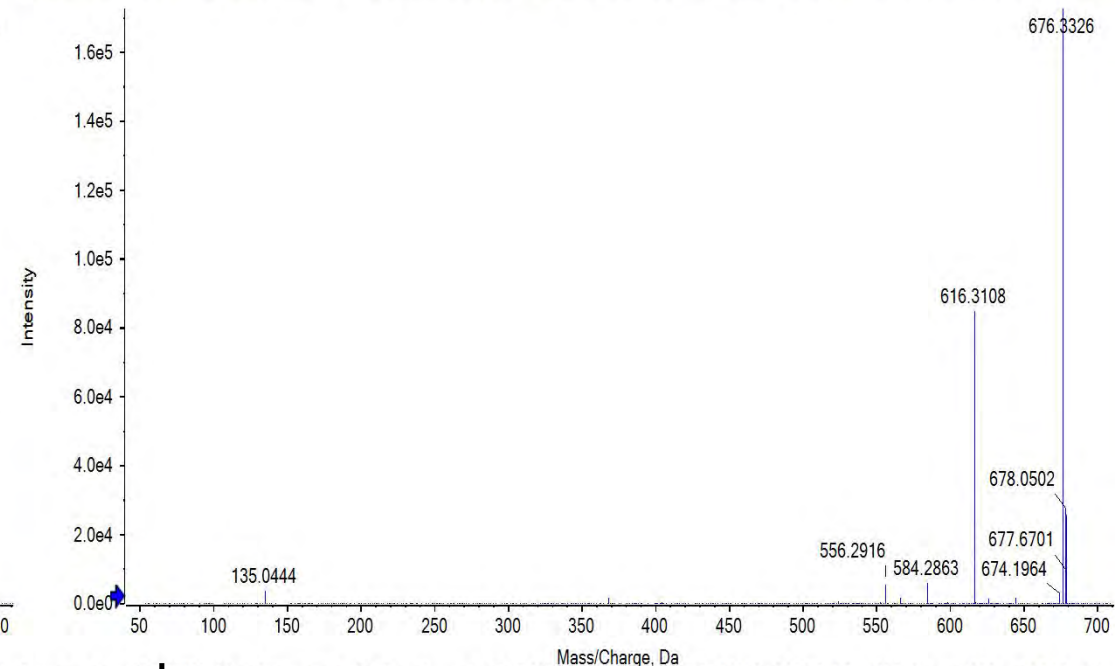

**c** 50 eV

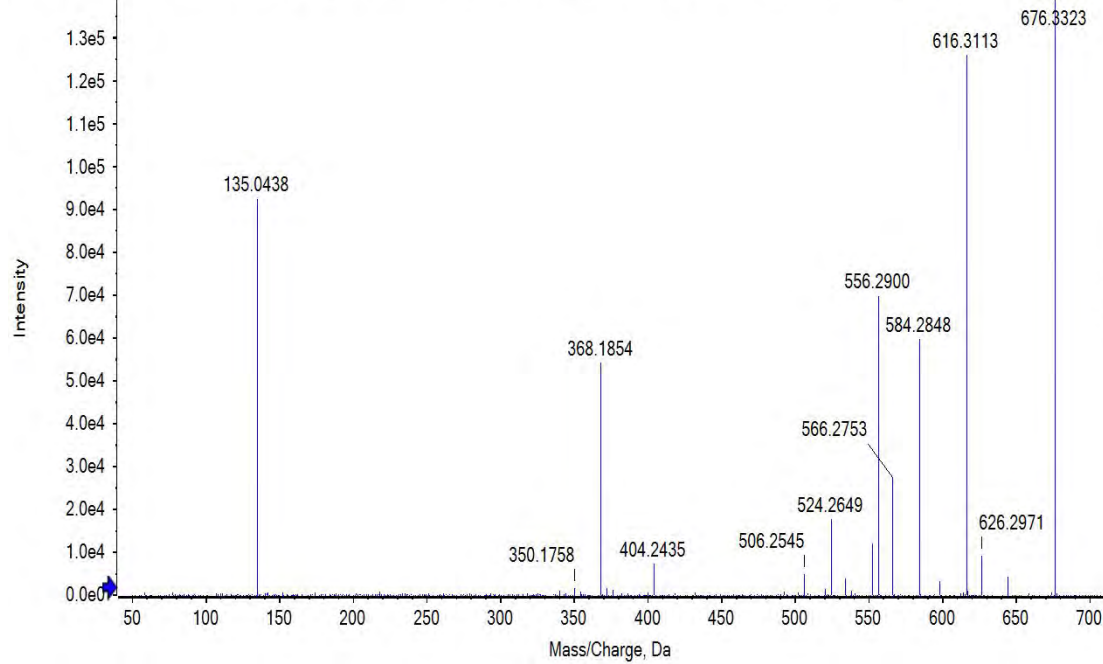

**d** CES

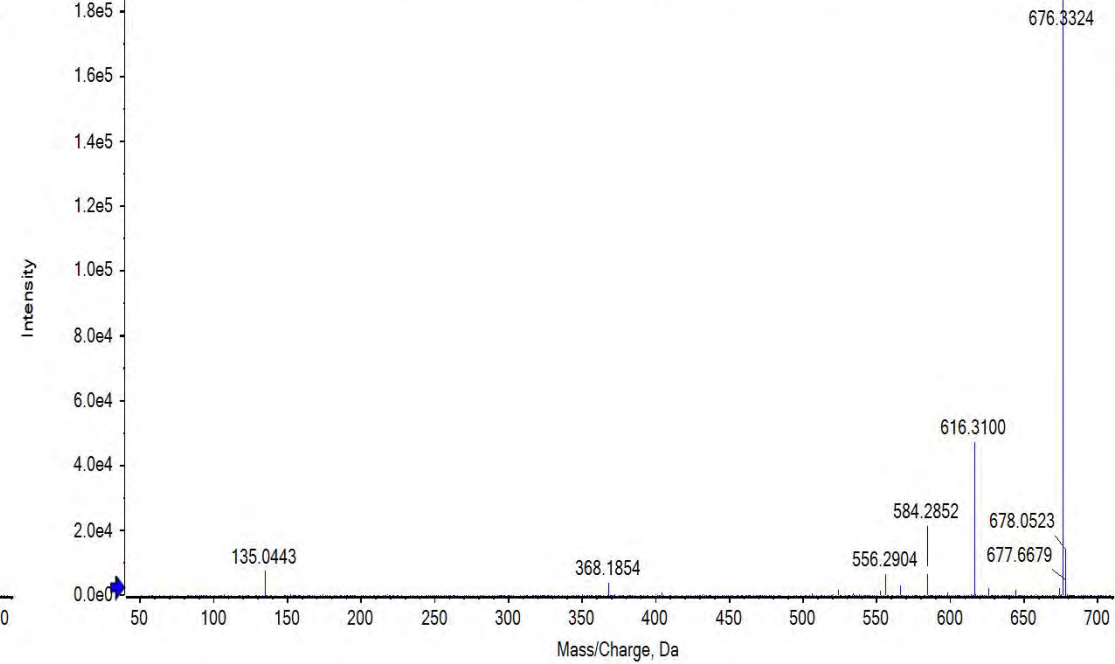

# 43. Cymarin

**a** 20 eV

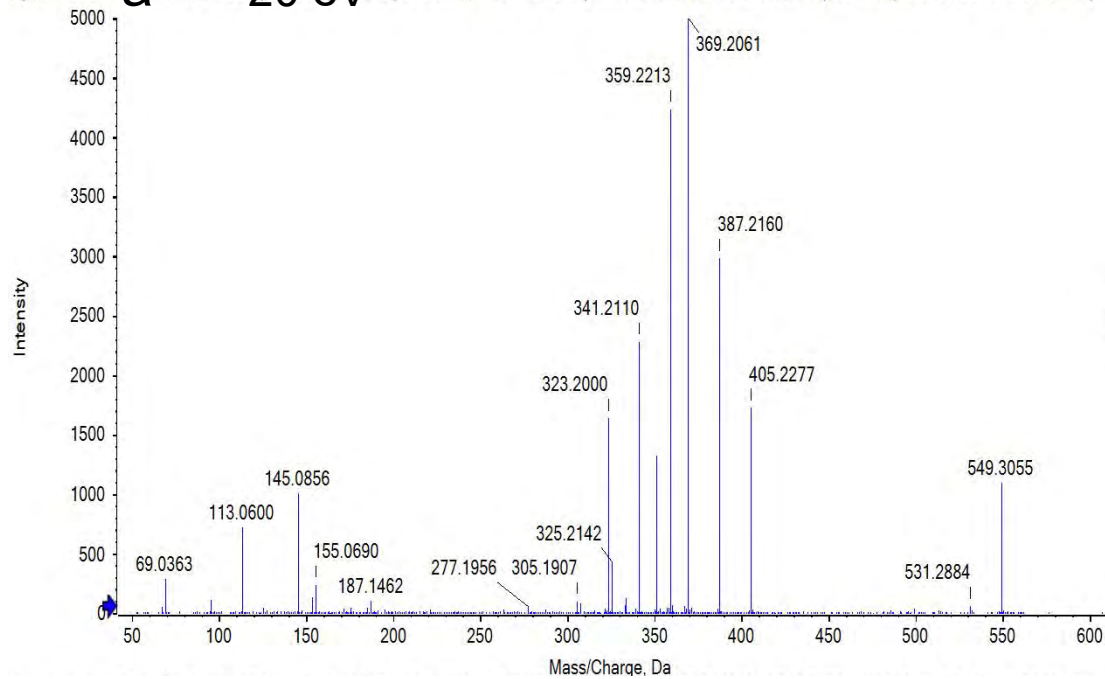

**b** 35eV

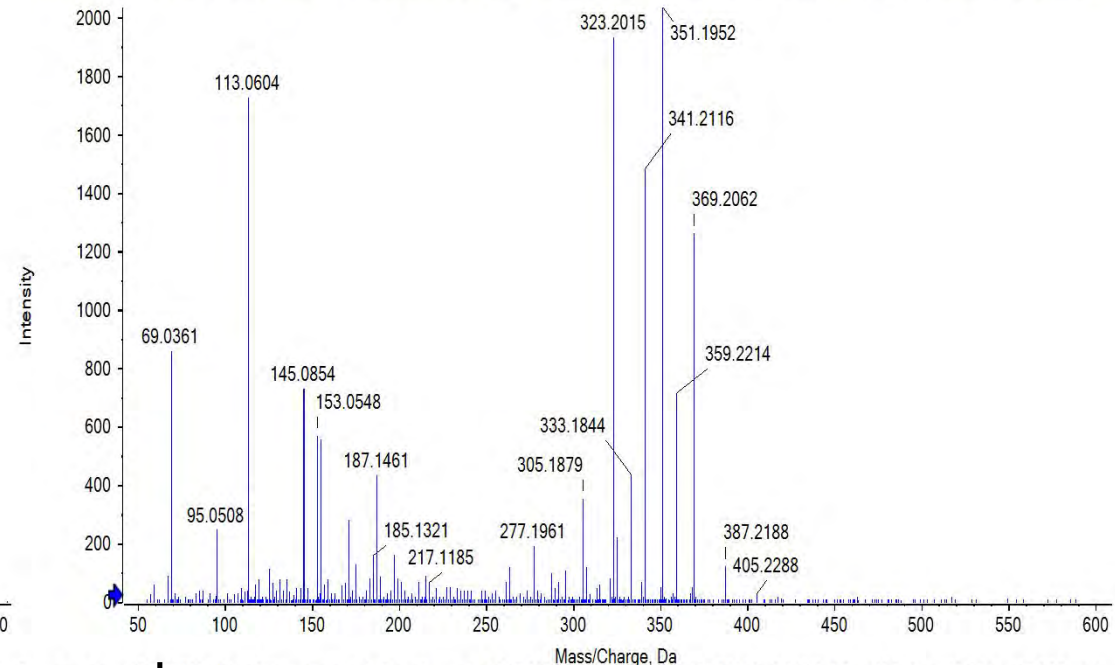

**c** 50 eV

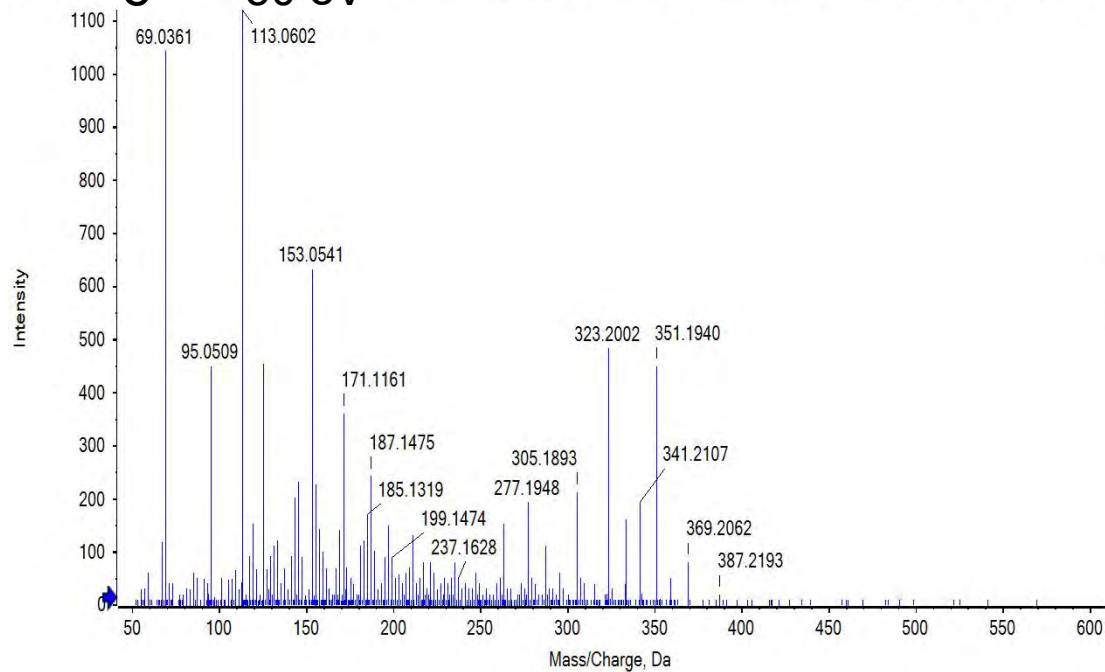

**d** CES

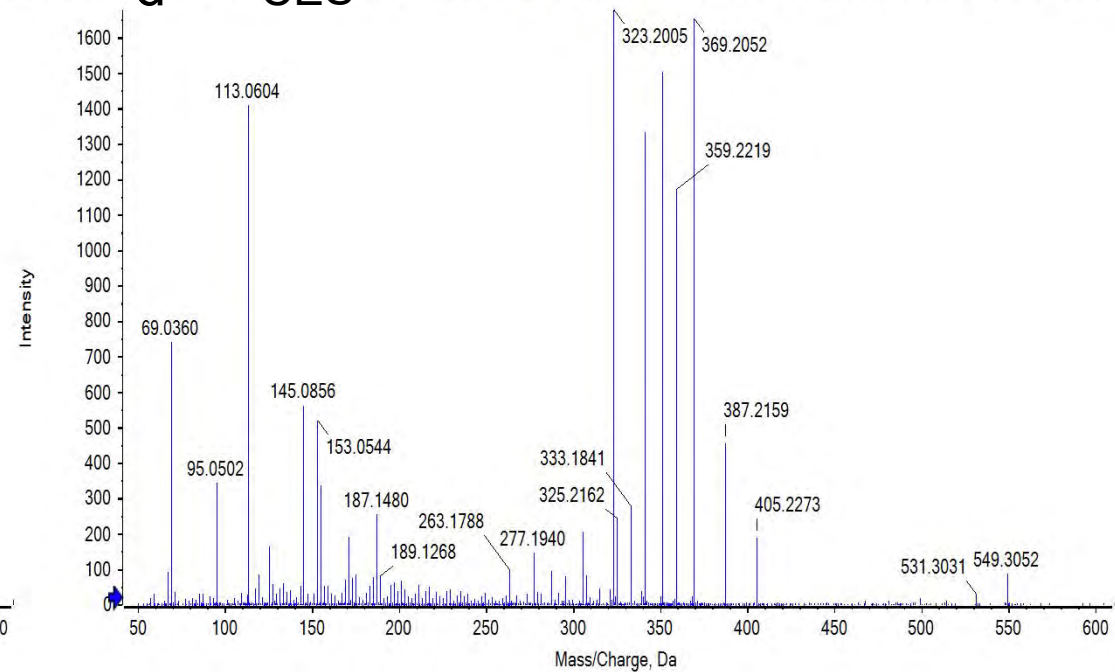

# 44. Bufalin

**a** 20 eV

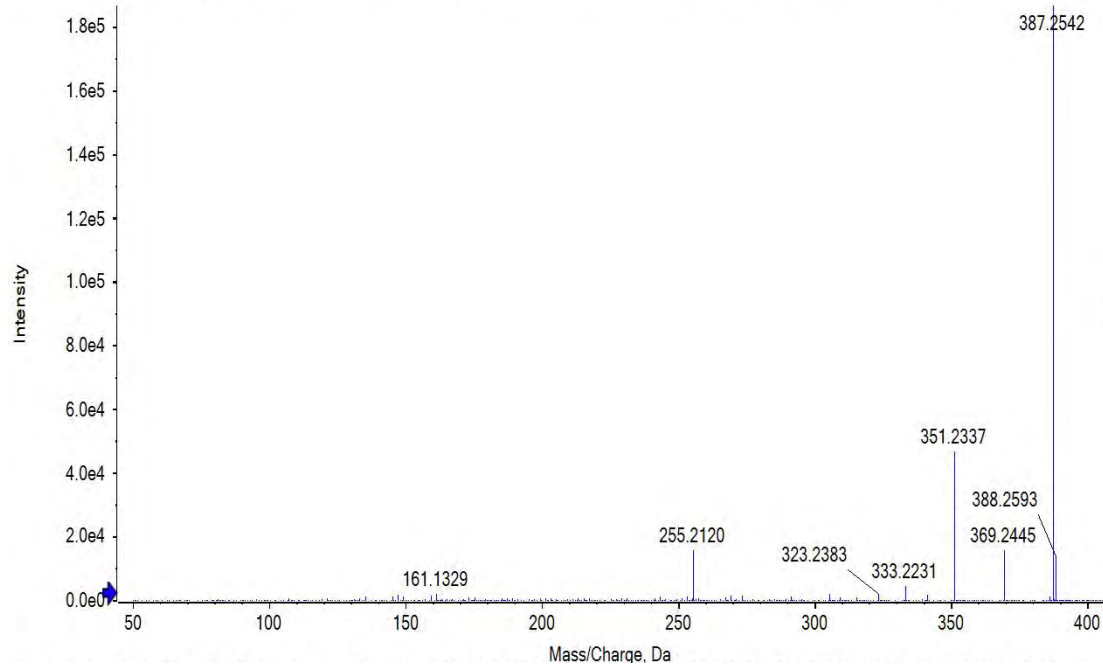

**b** 35eV

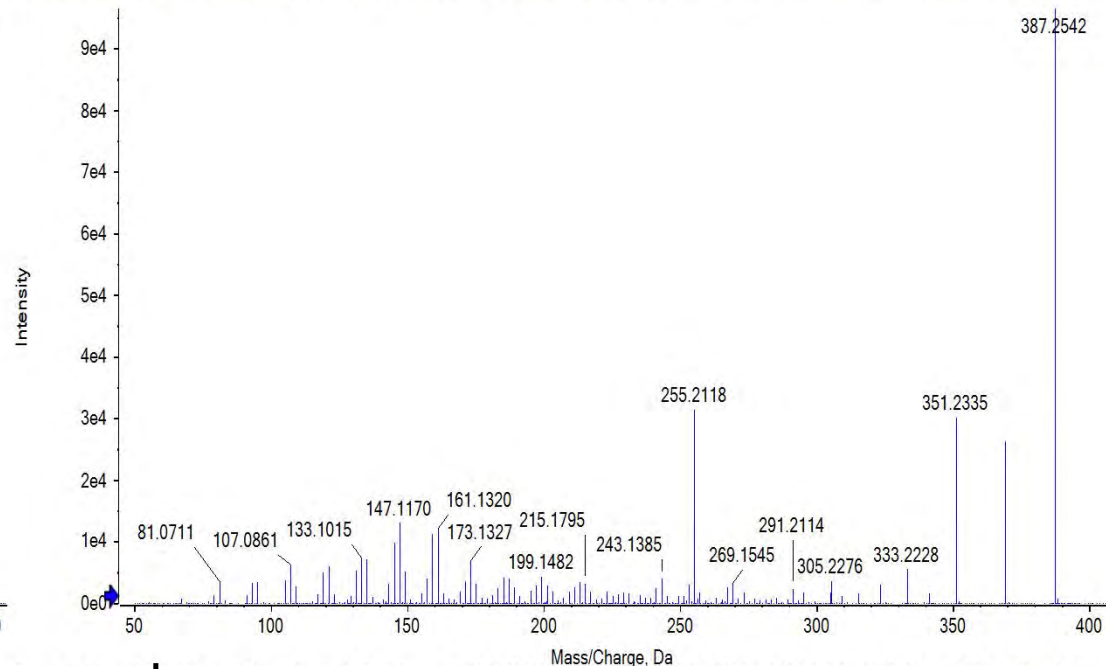

**c** 50 eV

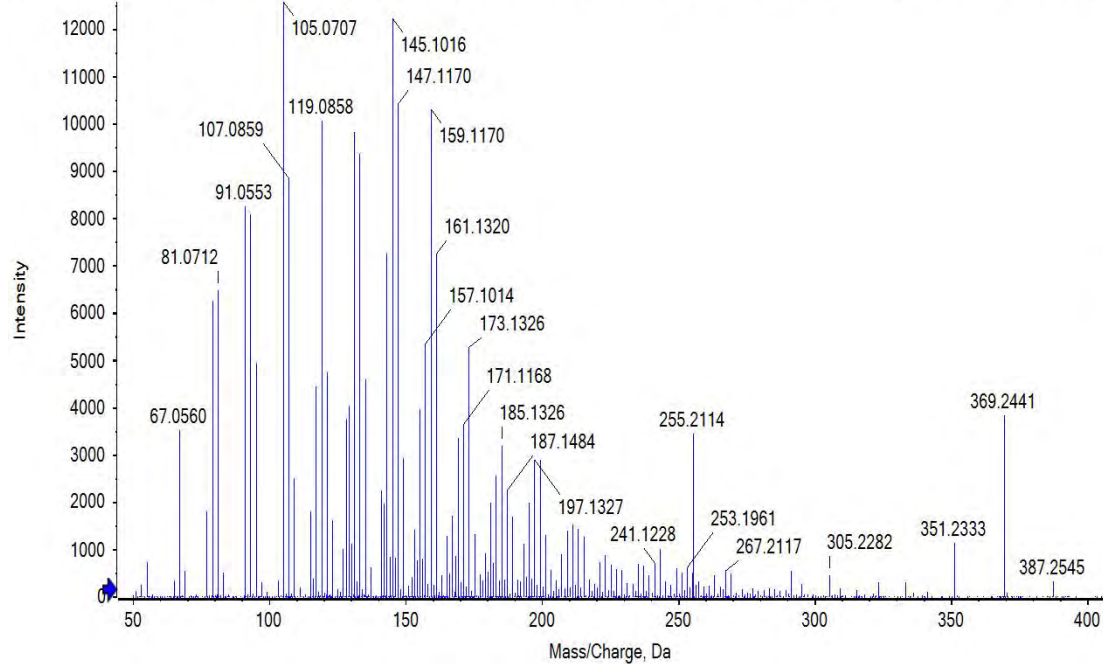

**d** CES

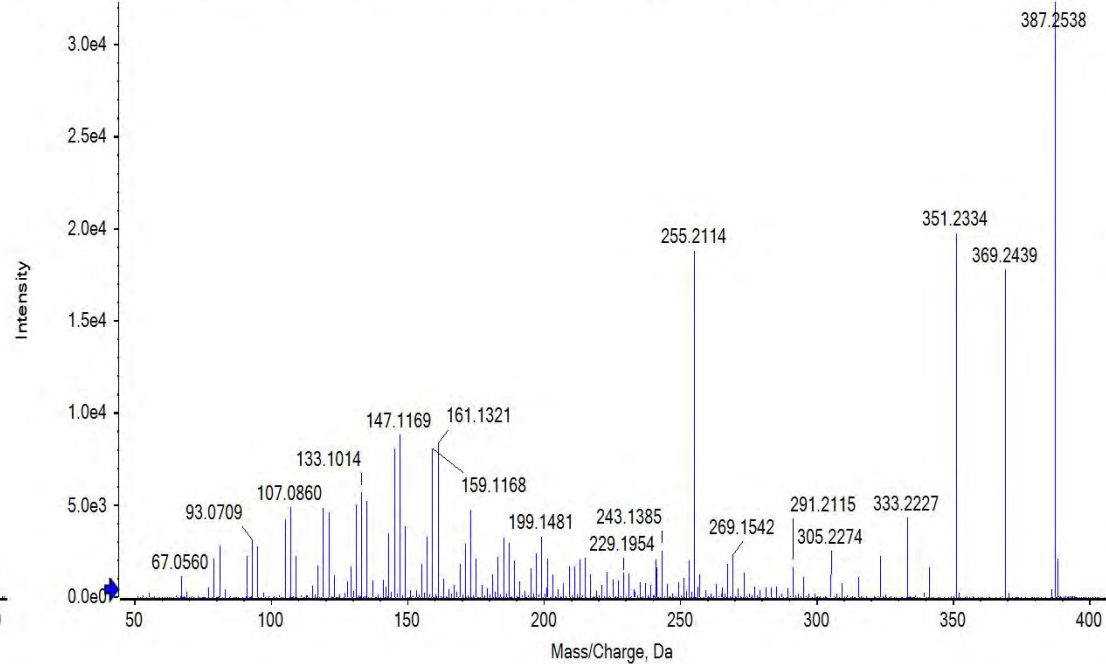

# 45. Cucurbitacin E

**a** 20 eV

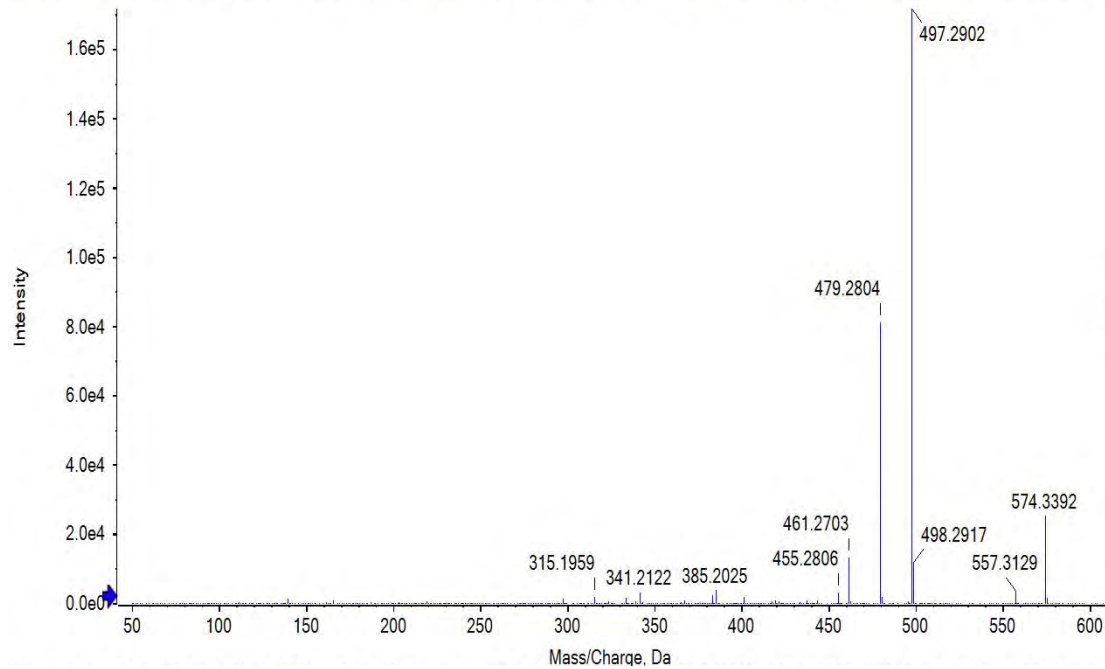

**b** 35eV

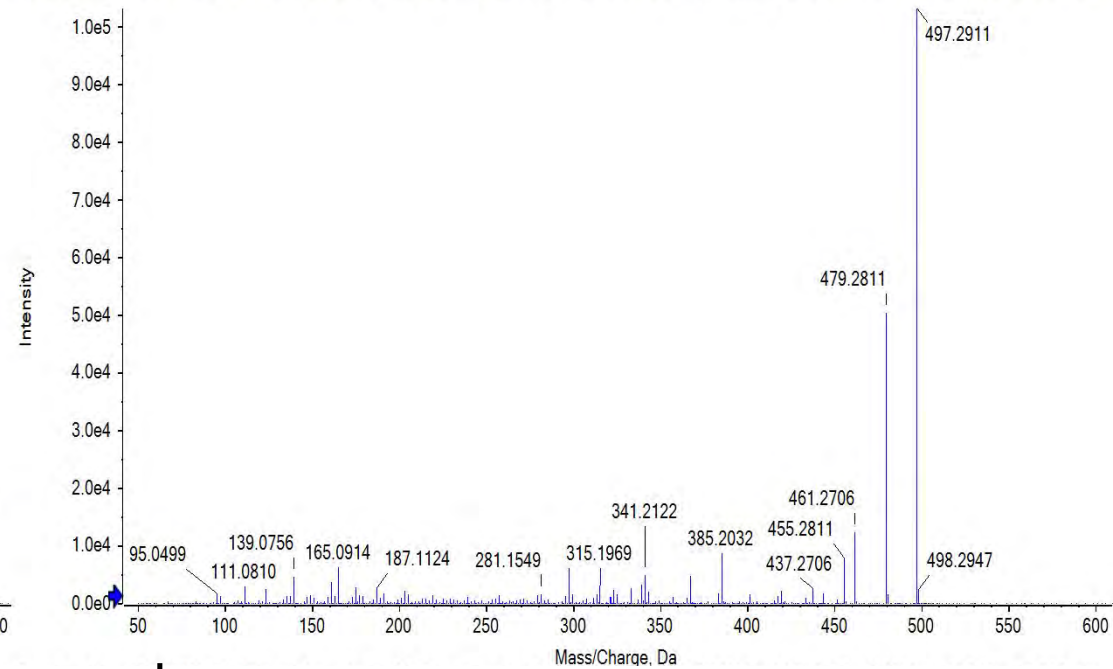

**c** 50 eV

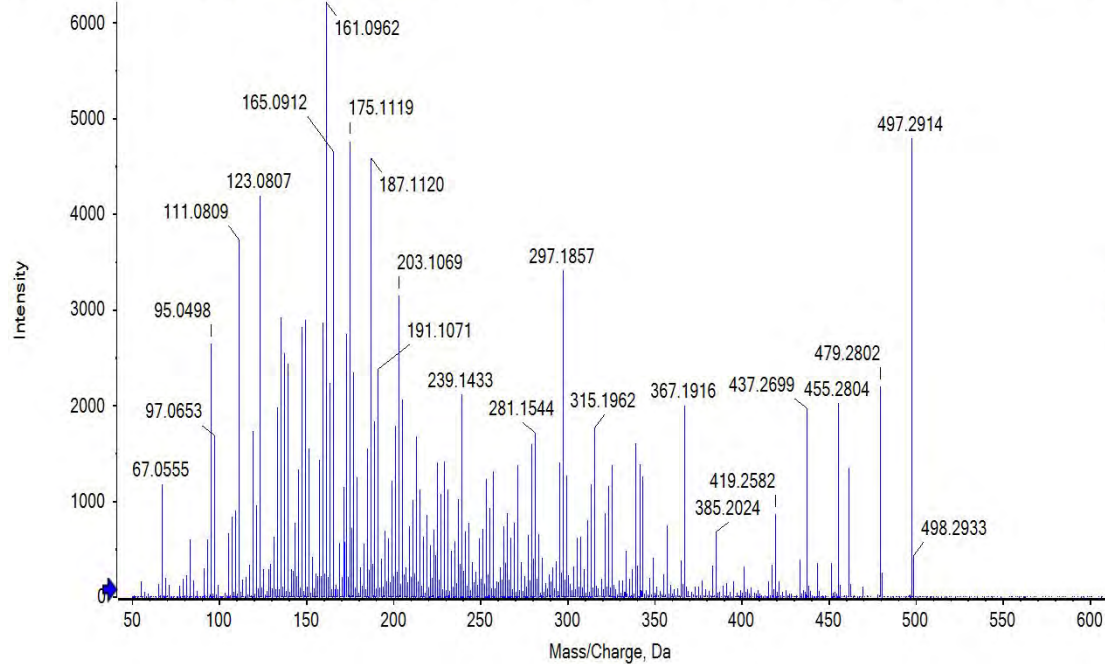

**d** CES

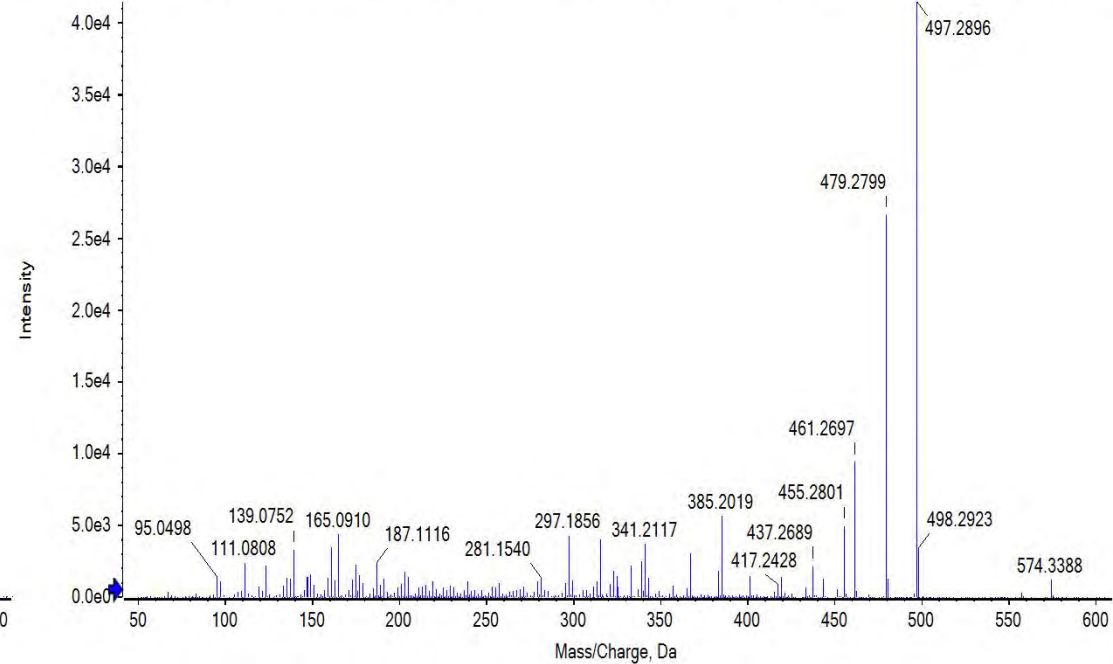

# 46. $\alpha$ -Solanine

**a** -20 eV

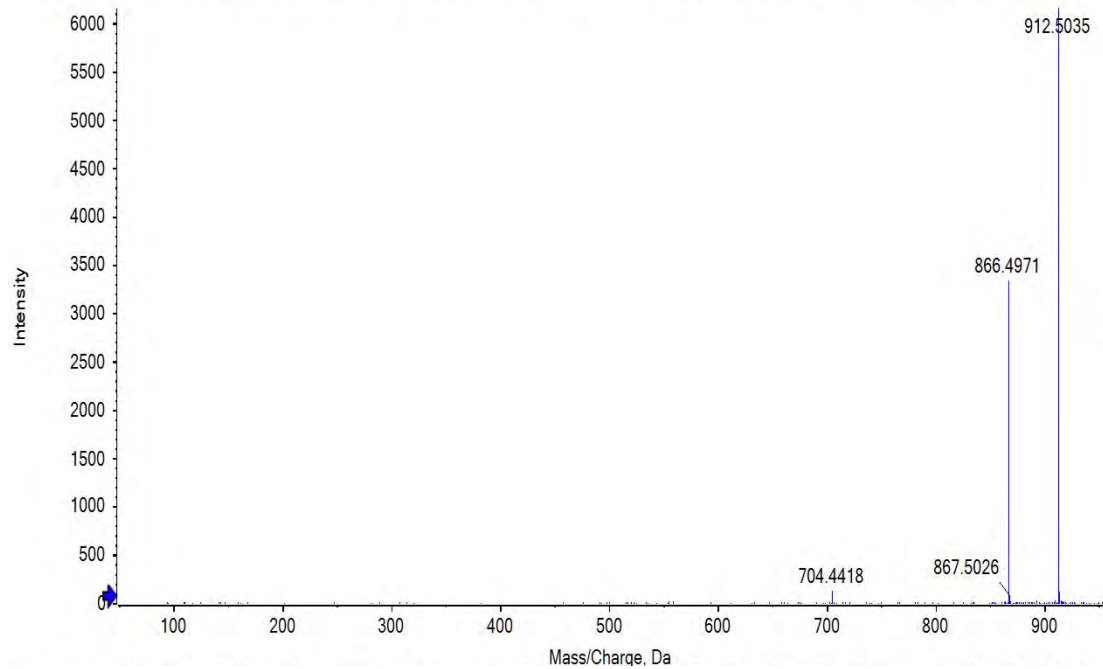

**b** -35eV

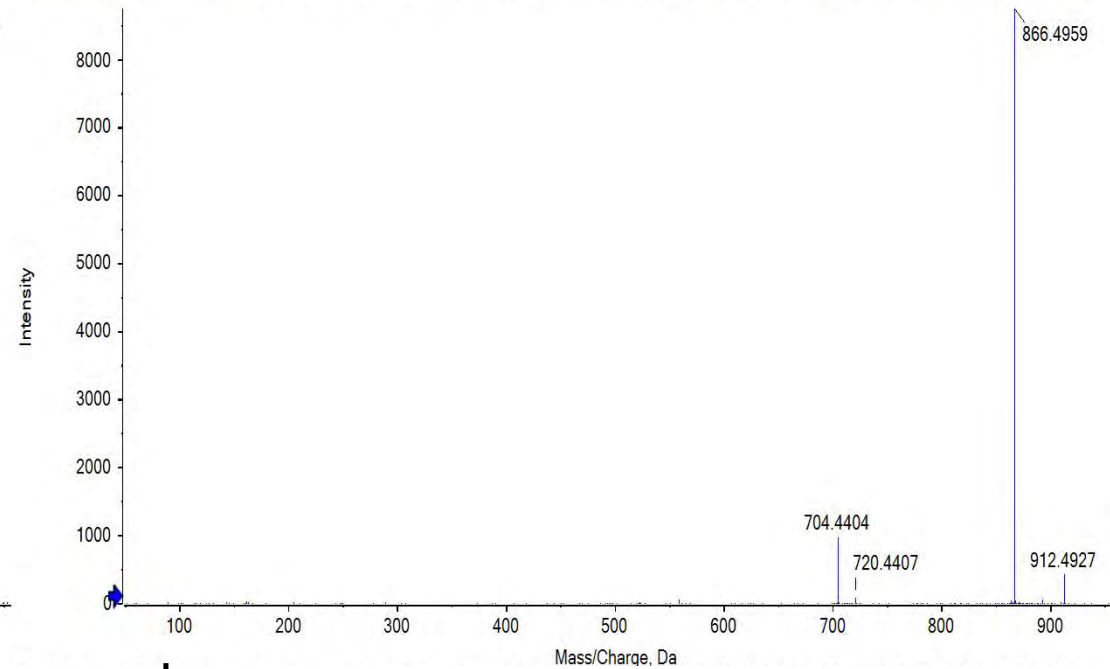

**c** -50 eV

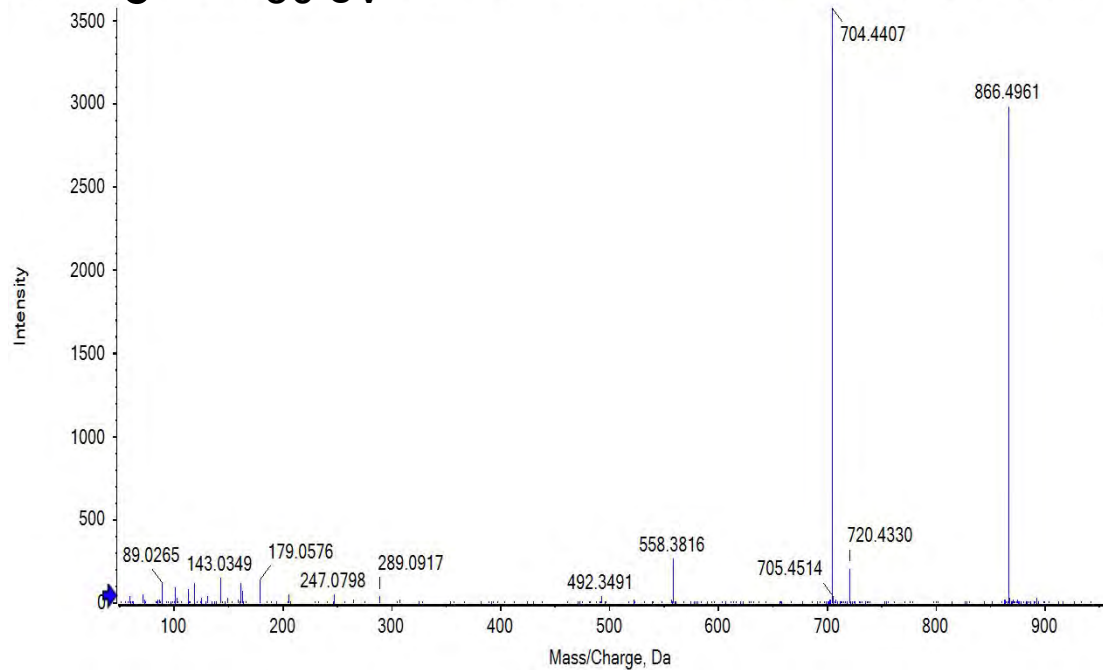

**d** CES

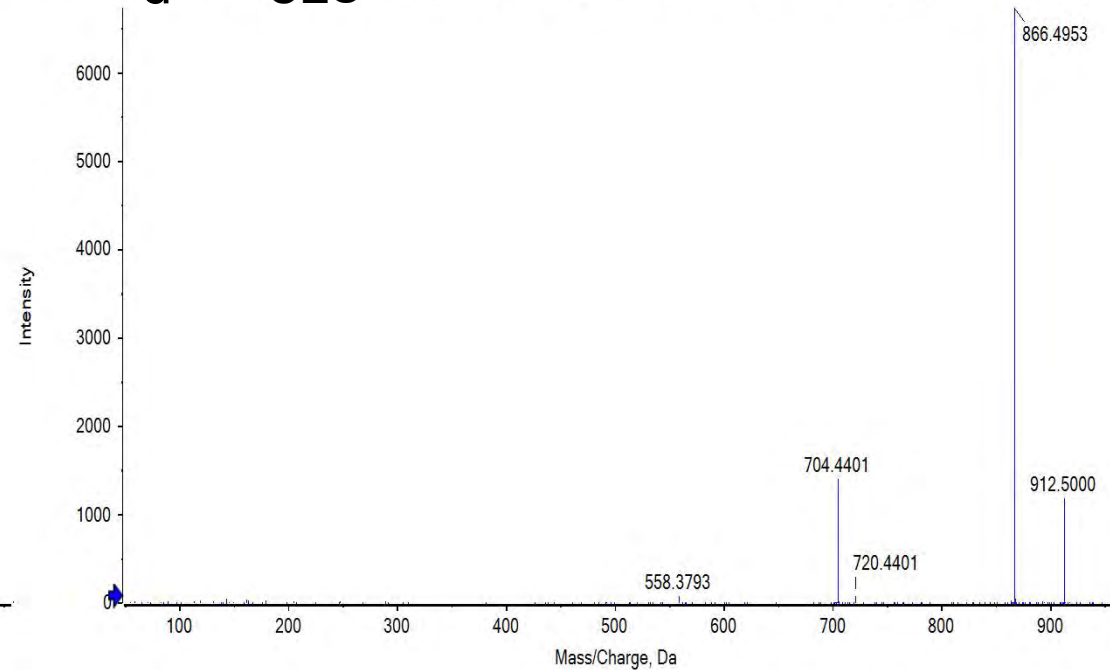

# 47. $\alpha$ -Chaconine

**a** -20 eV

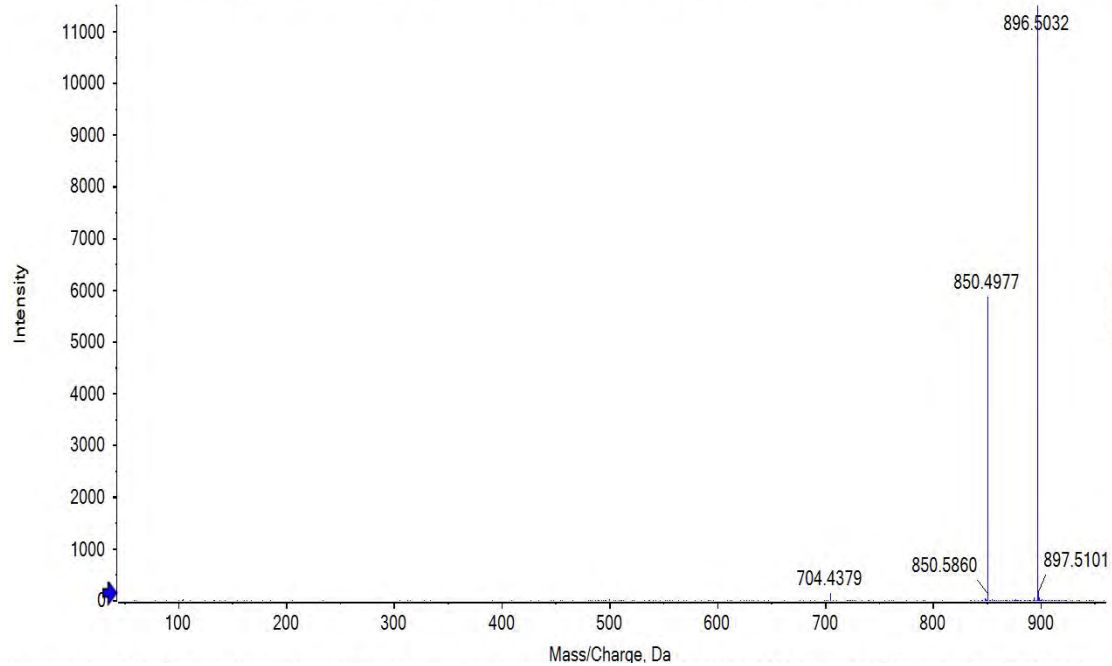

**b** -35eV

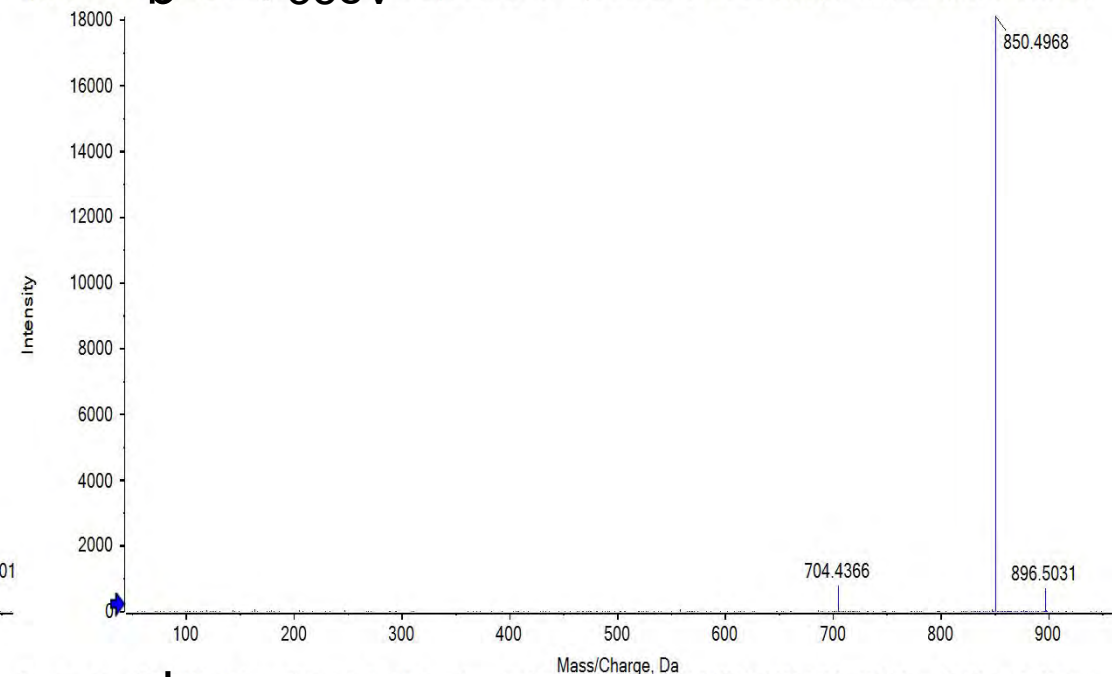

**c** -50 eV

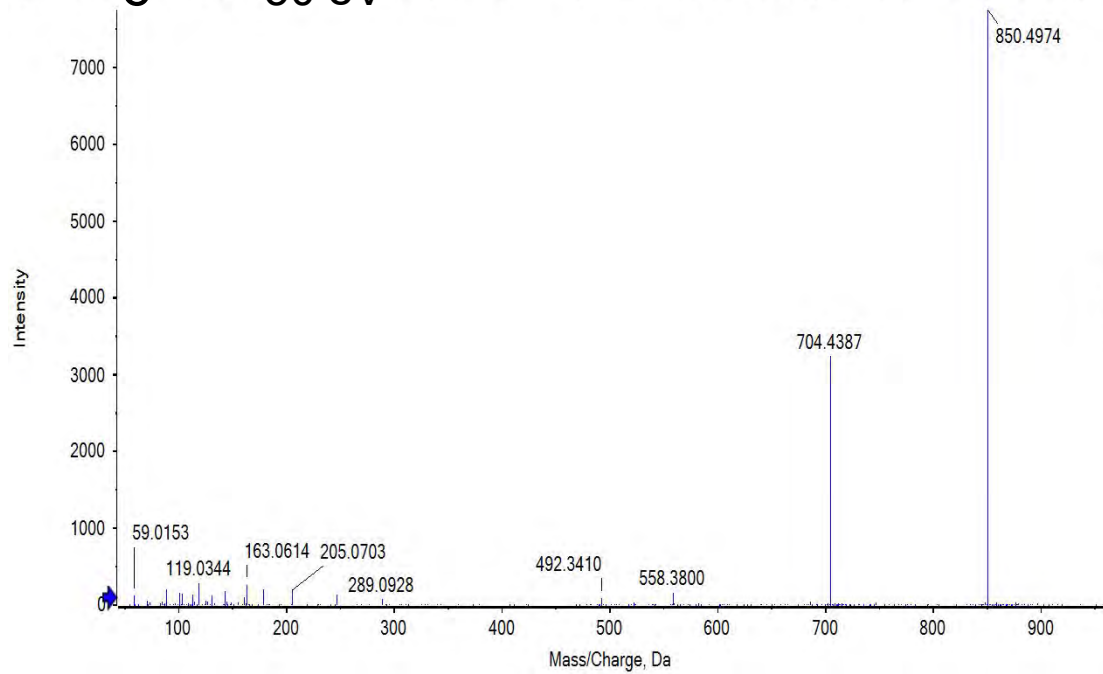

**d** CES

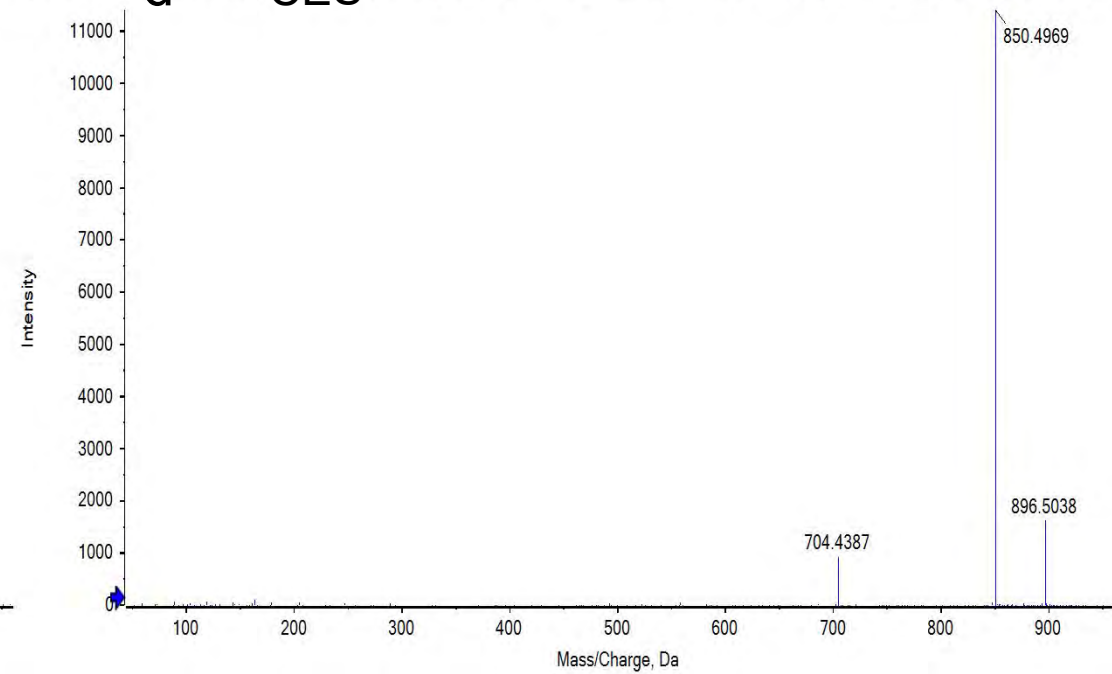

# 48. Oleandrin

**a** -20 eV

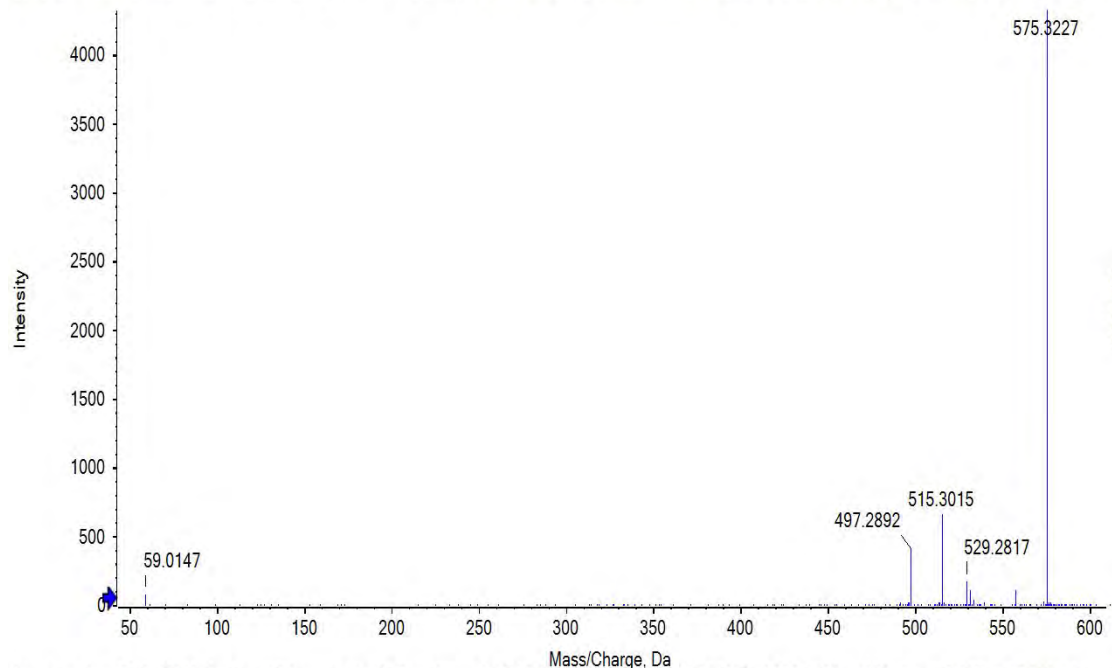

**b** -35eV

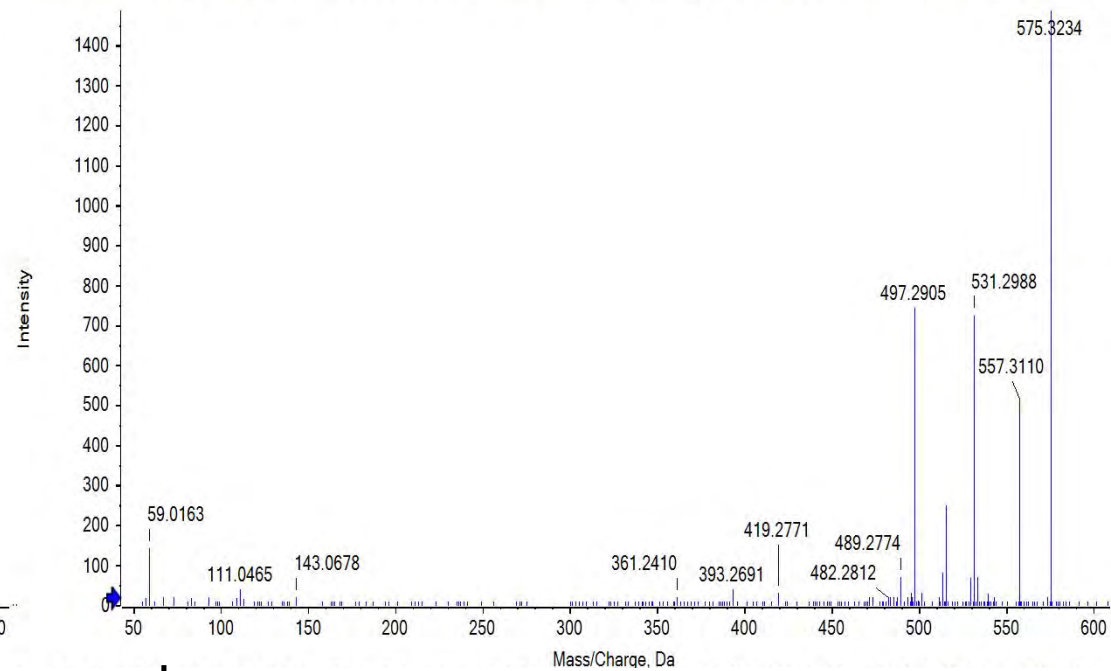

**c** -50 eV

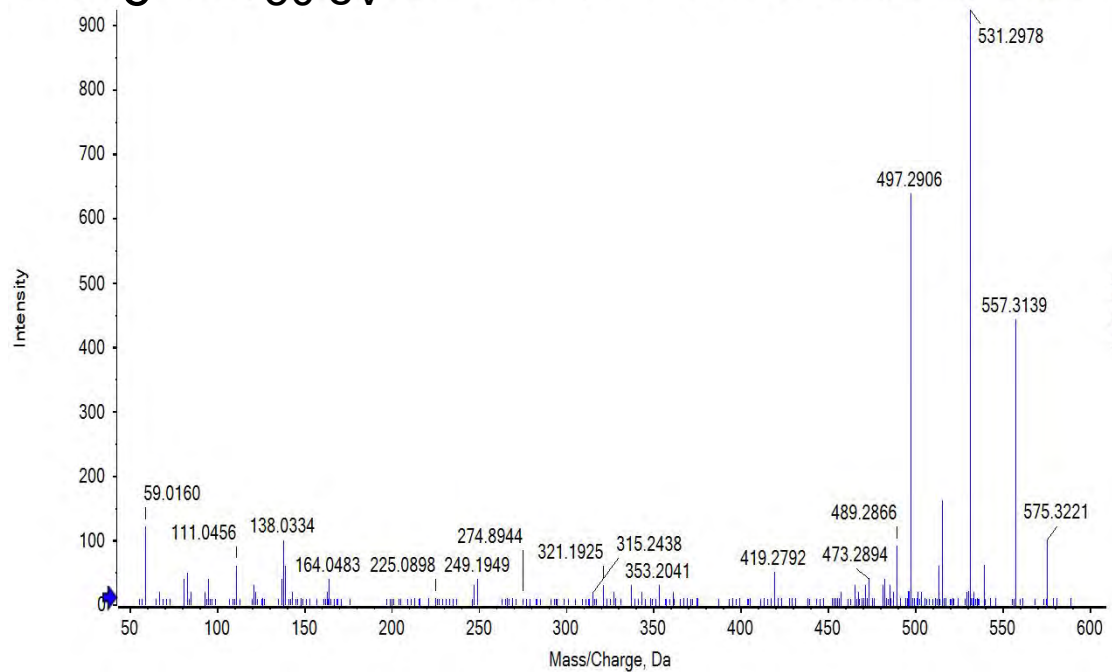

**d** CES

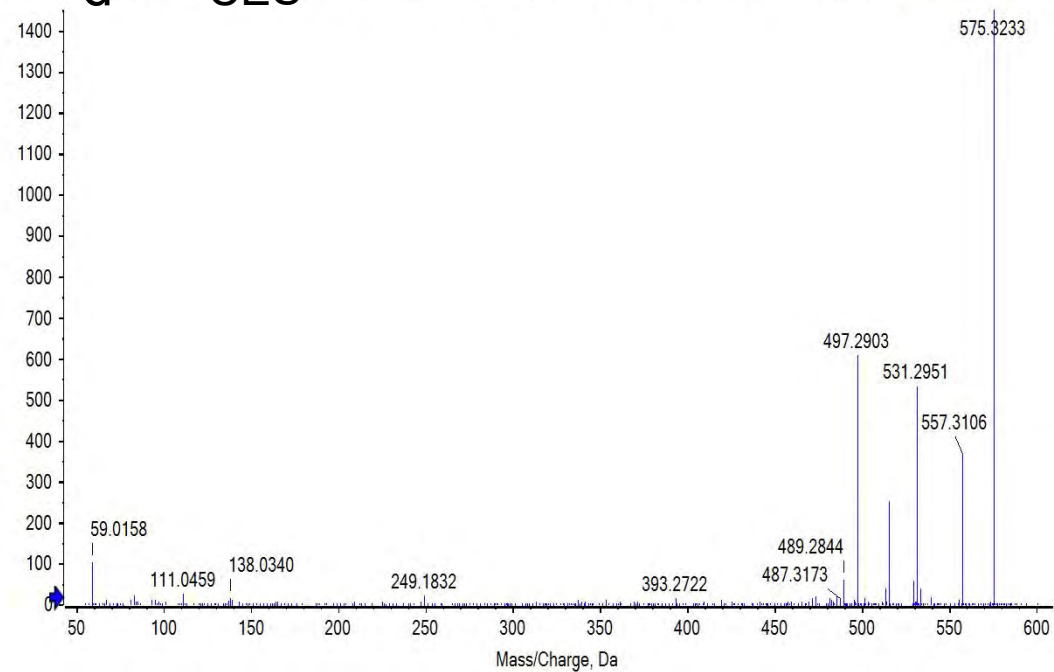



# 49. Cinobufagin

**a** 20 eV

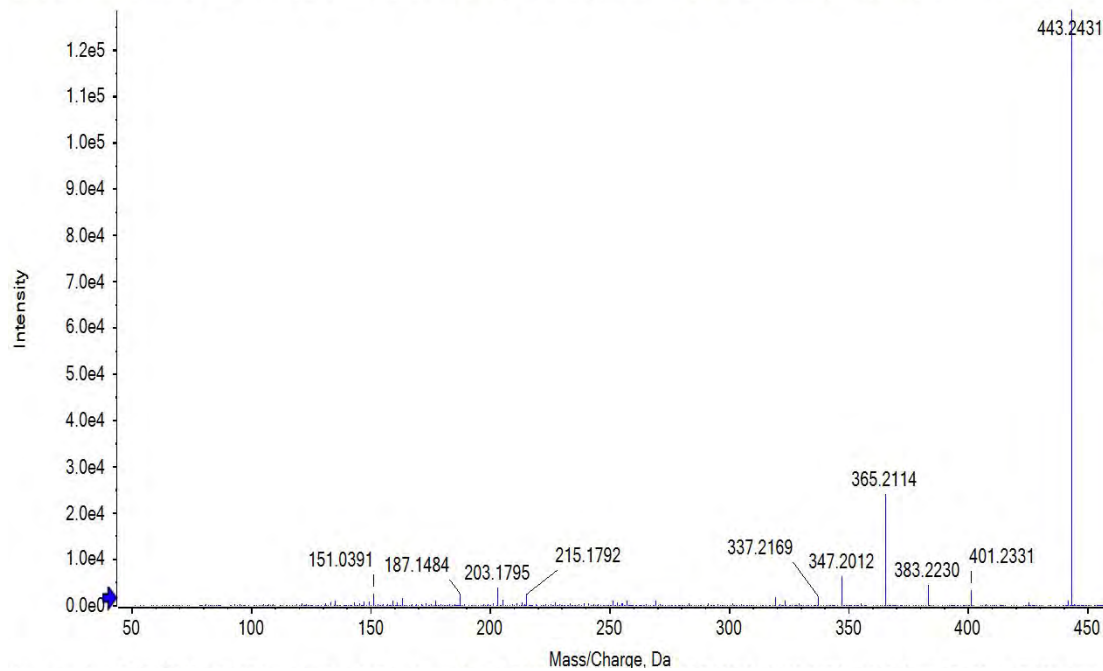

**b** 35eV

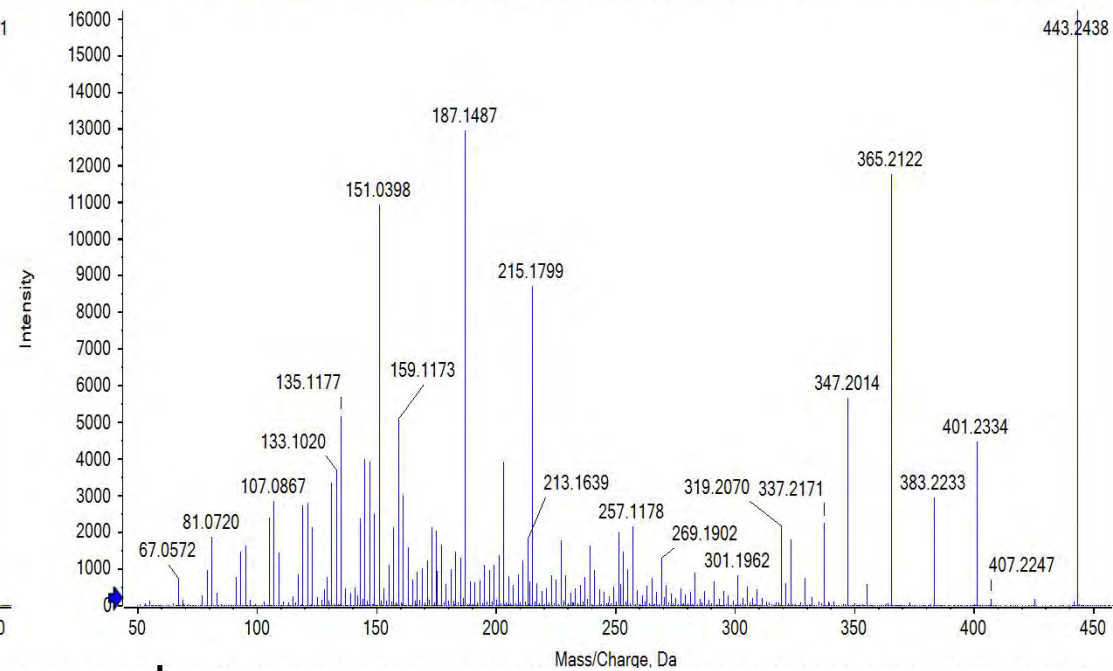

**c** 50 eV

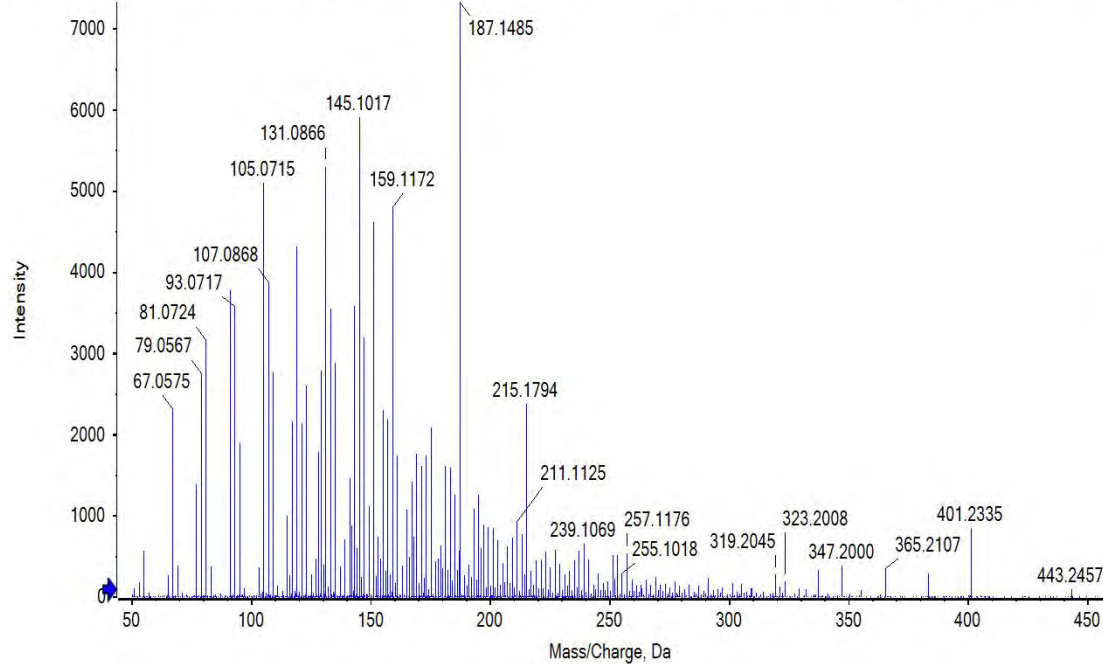

**d** CES

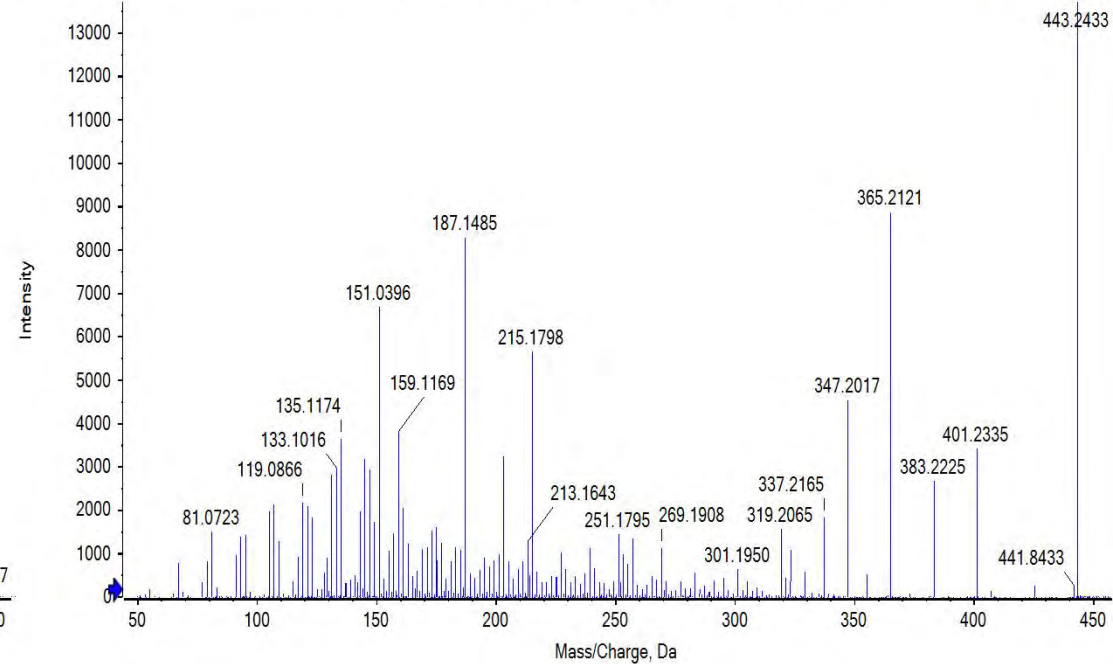

# 50. Resibufogenin

**a** 20 eV

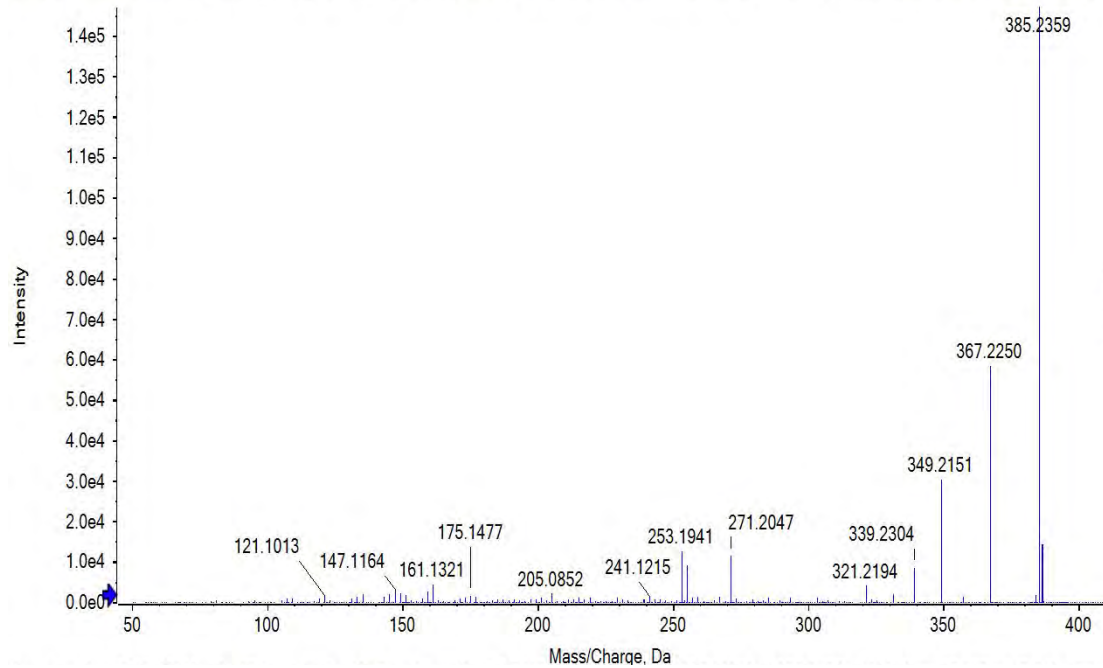

**b** 35eV

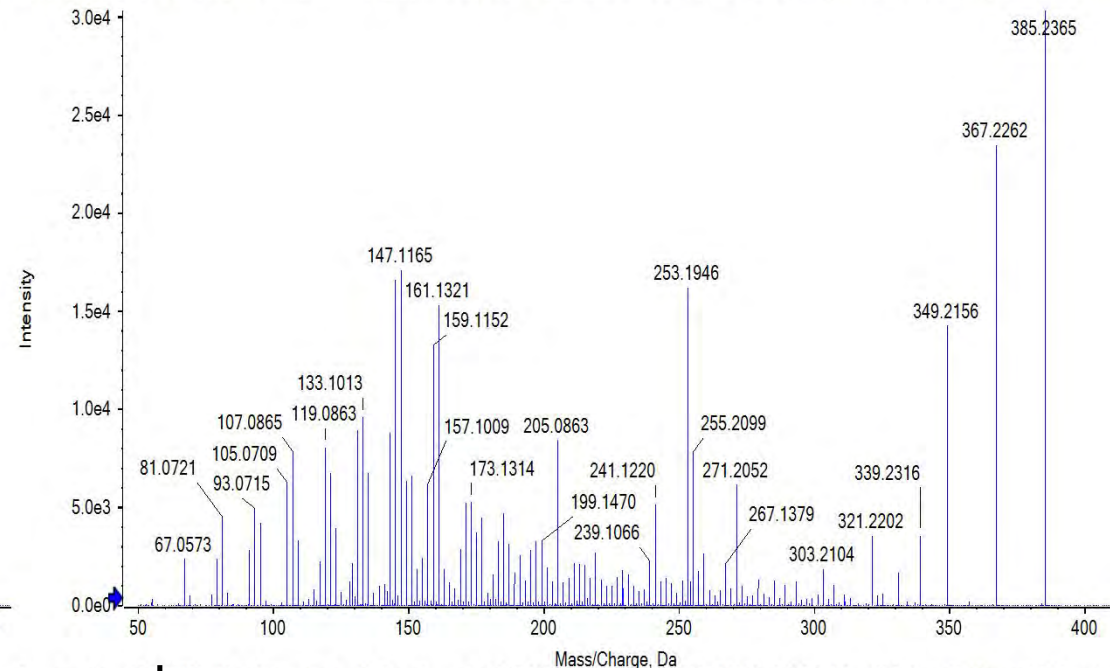

**c** 50 eV

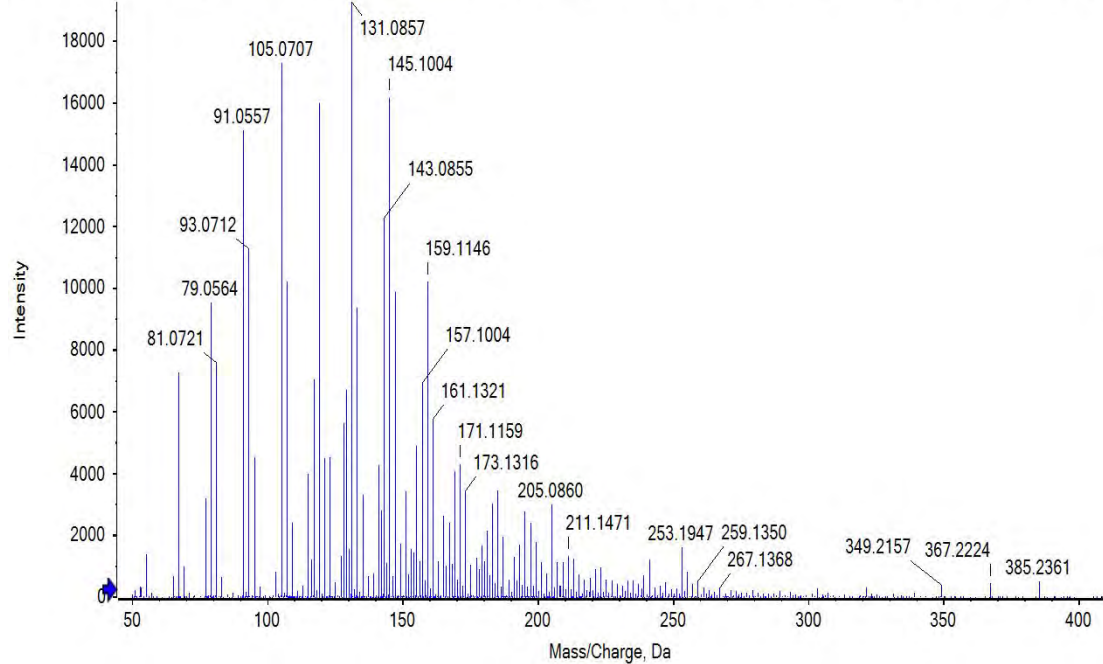

**d** CES

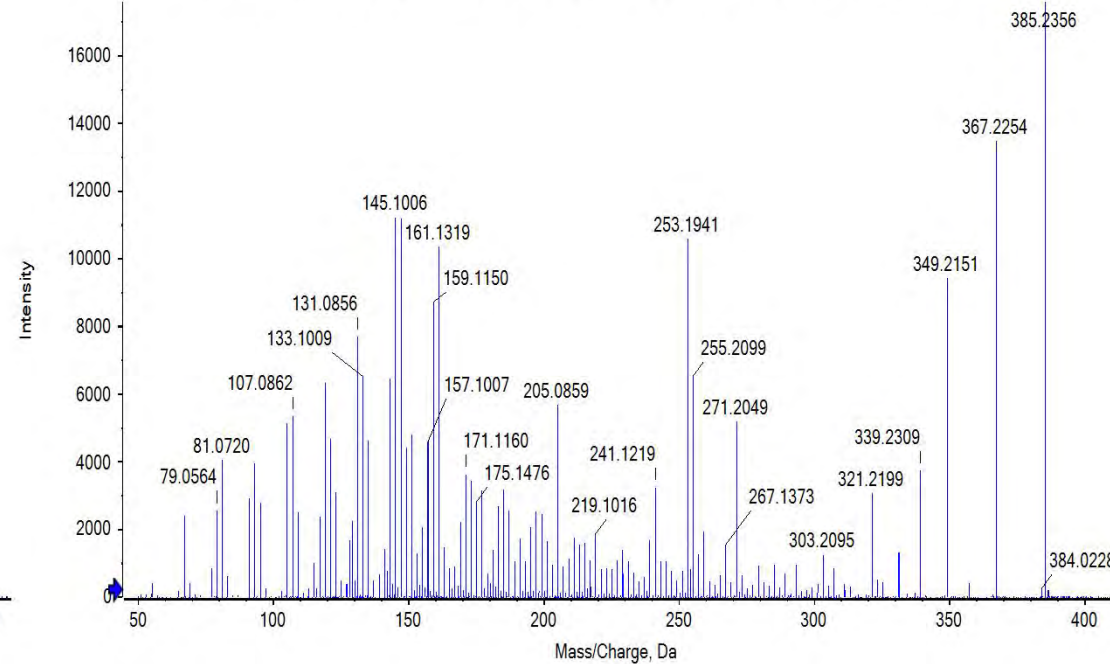

# 51. Digitoxin

**a** -20 eV

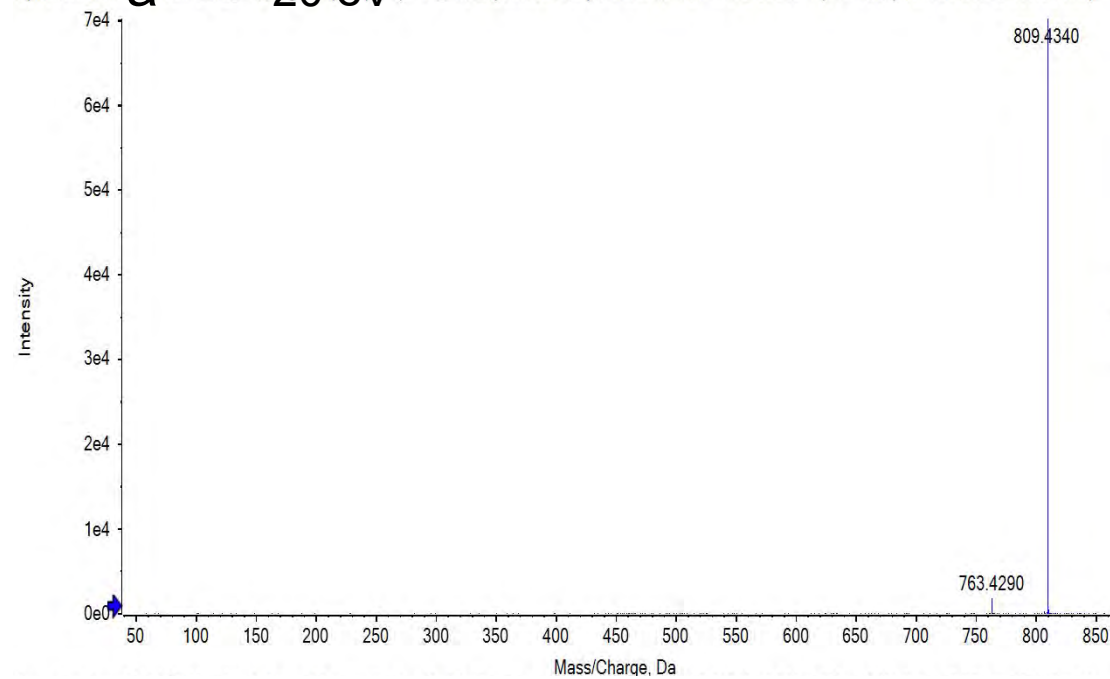

**b** -35eV

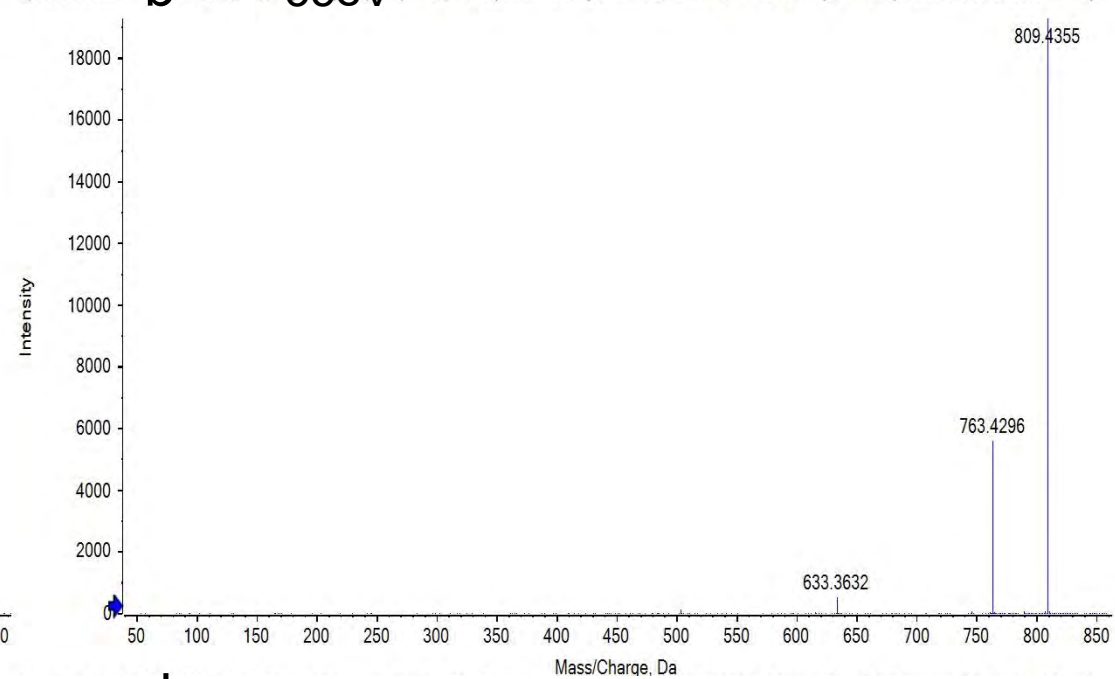

**c** -50 eV

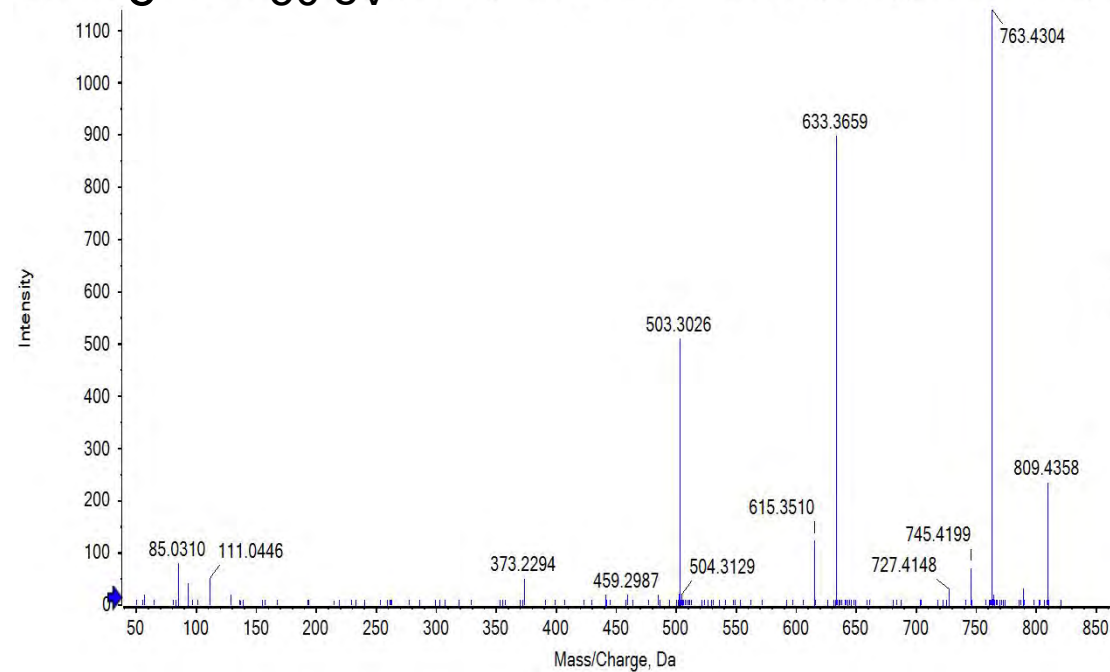

**d** CES

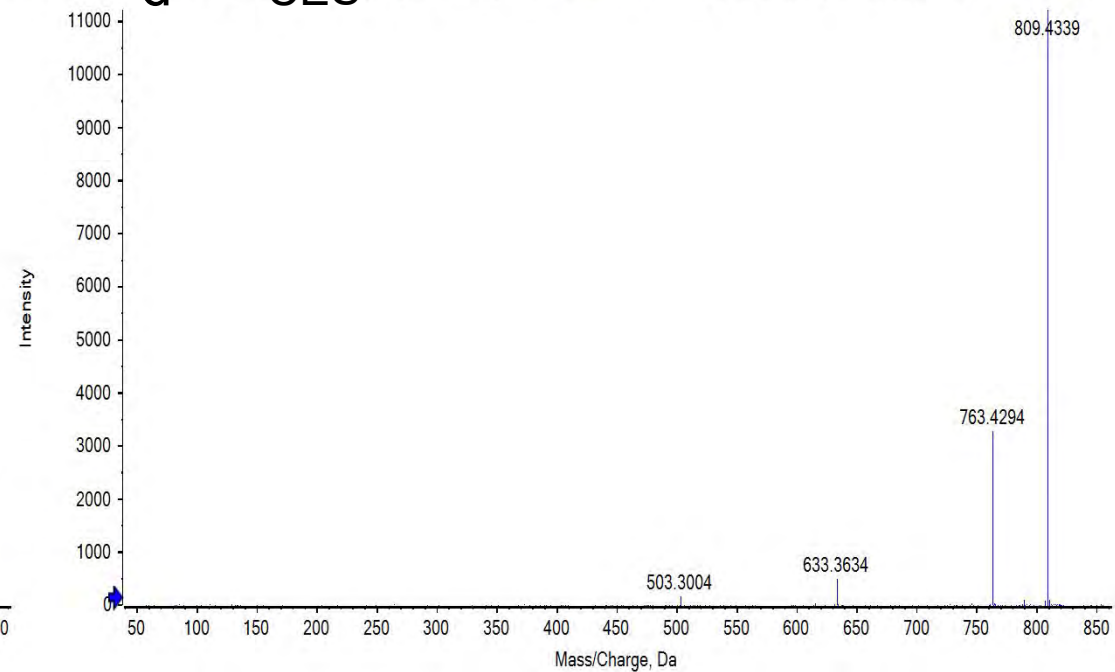

# 52. Okadaic acid

**a** 20 eV

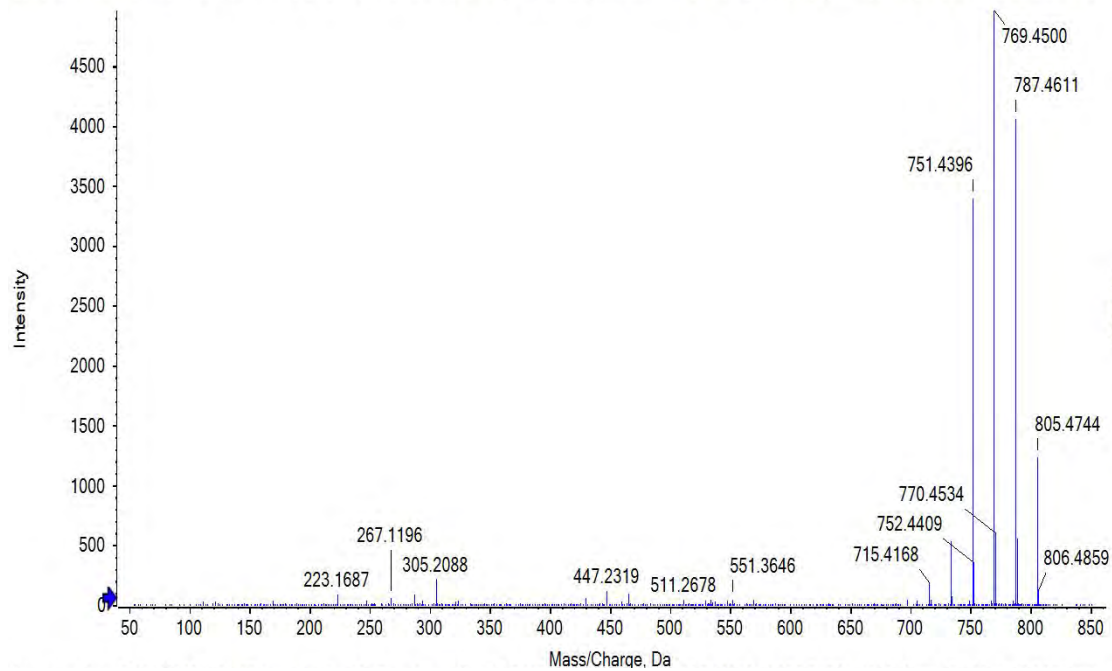

**b** 35eV

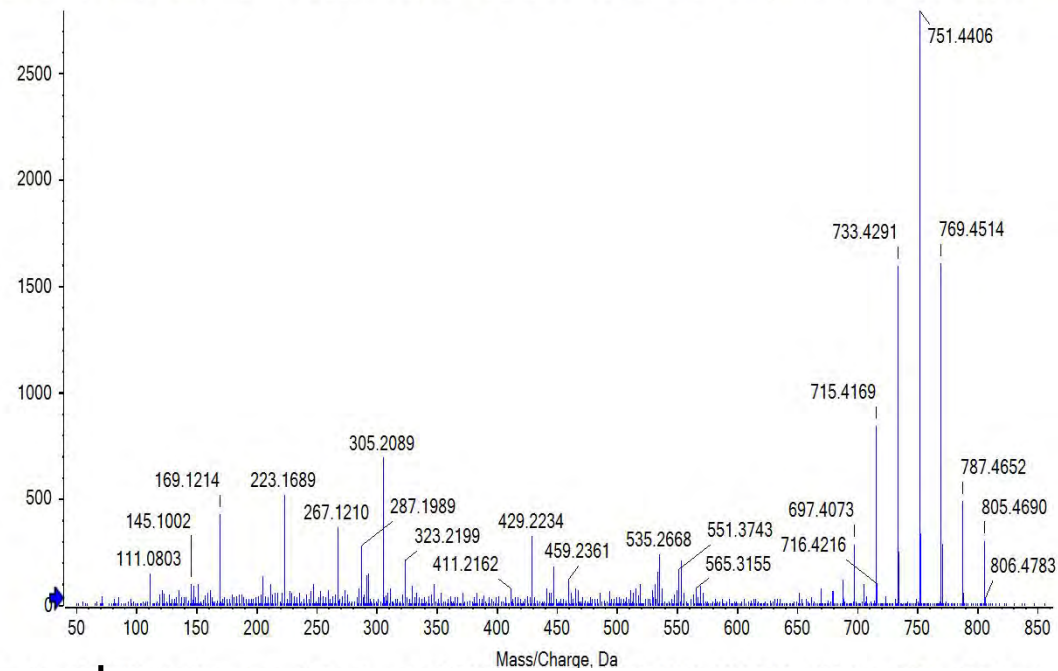

**c** 50 eV

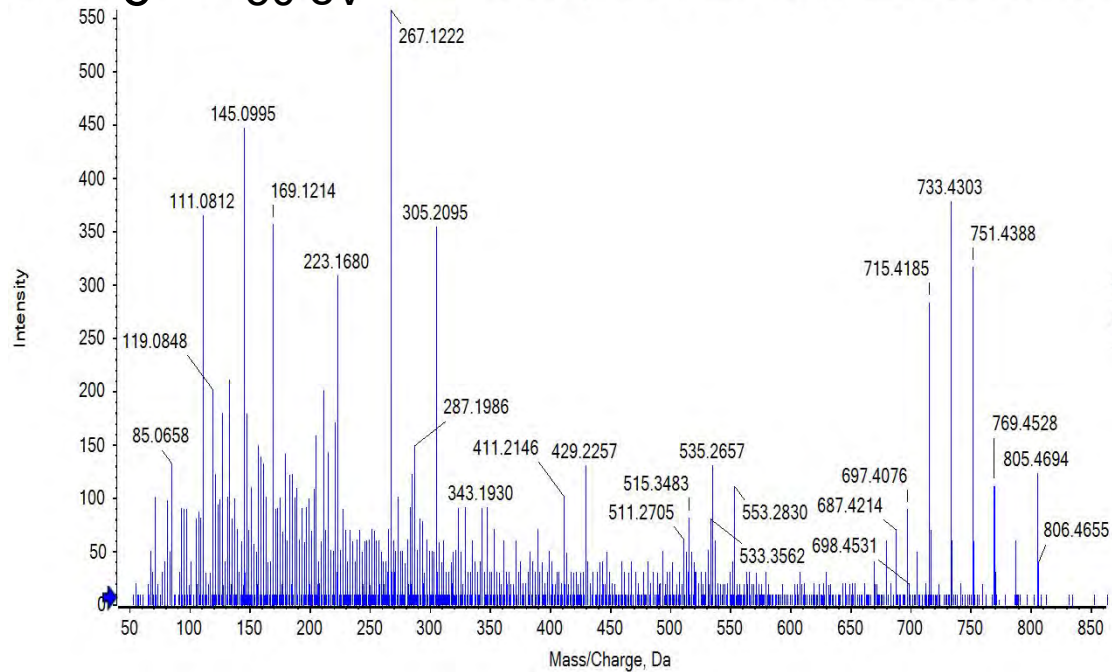

**d** CES

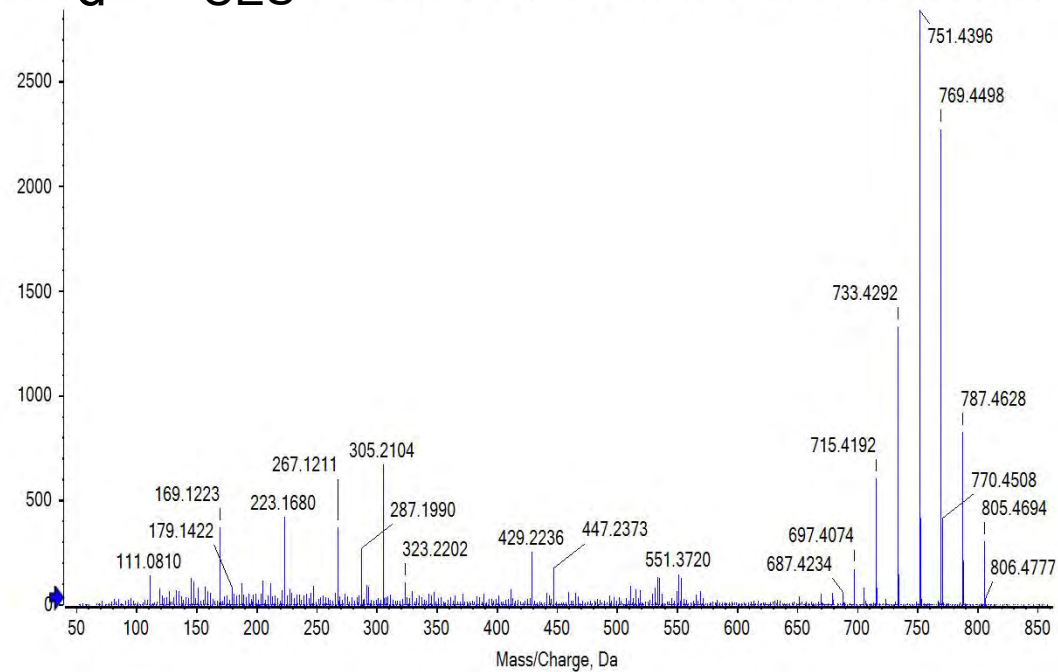

# 53. Dinophysistoxin-1

**a** 20 eV

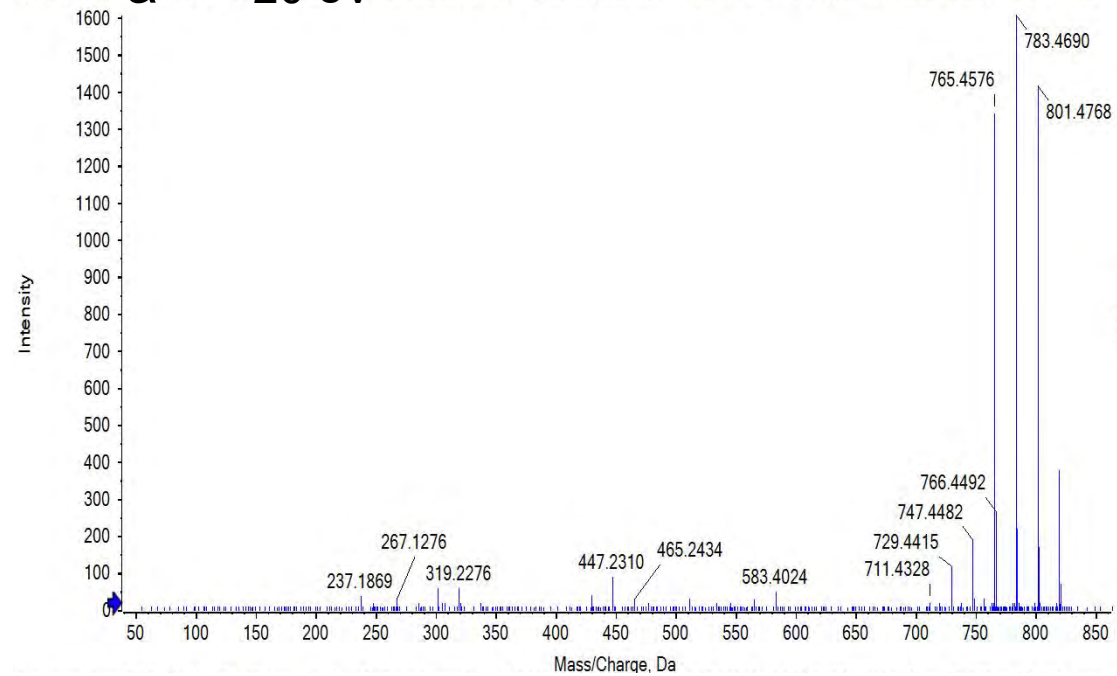

**b** 35eV

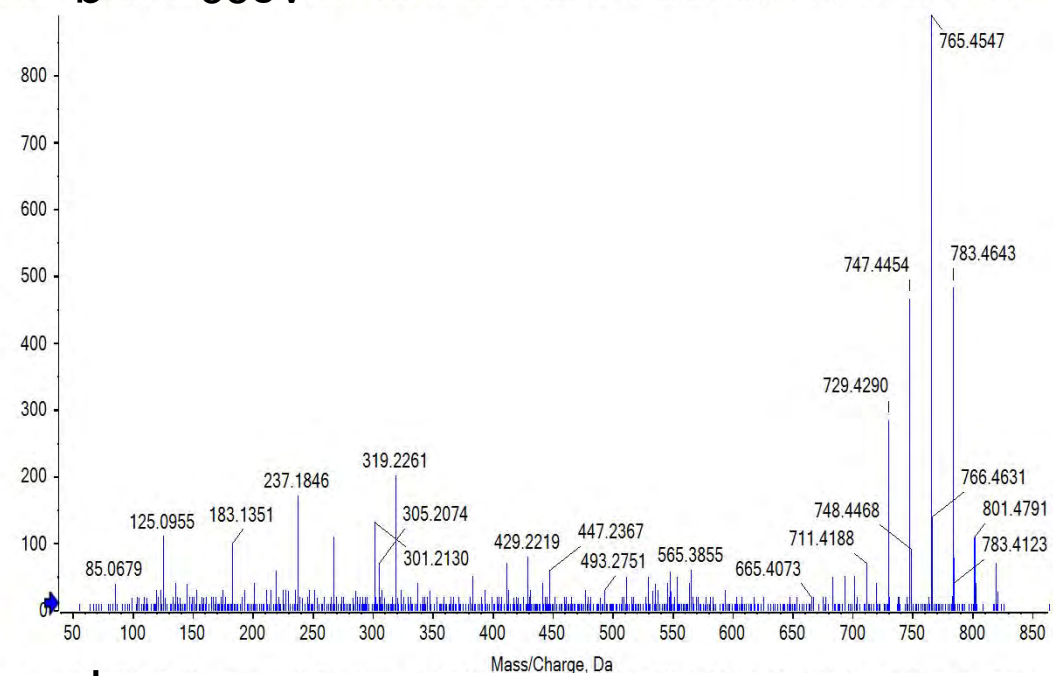

**c** 50 eV

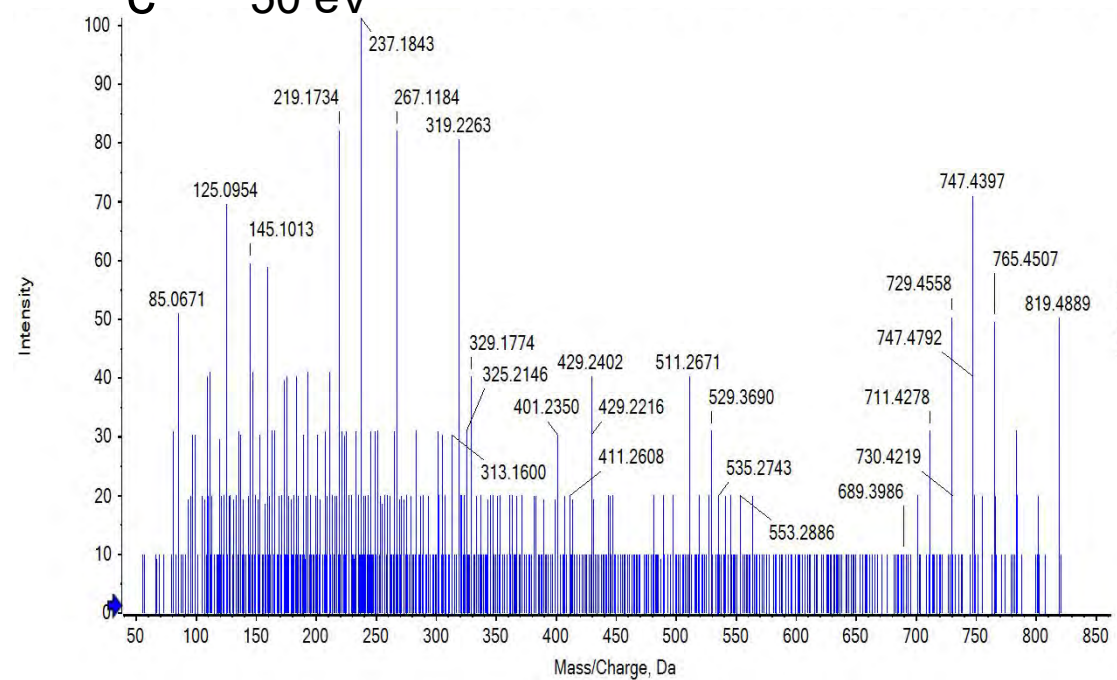

**d** CES

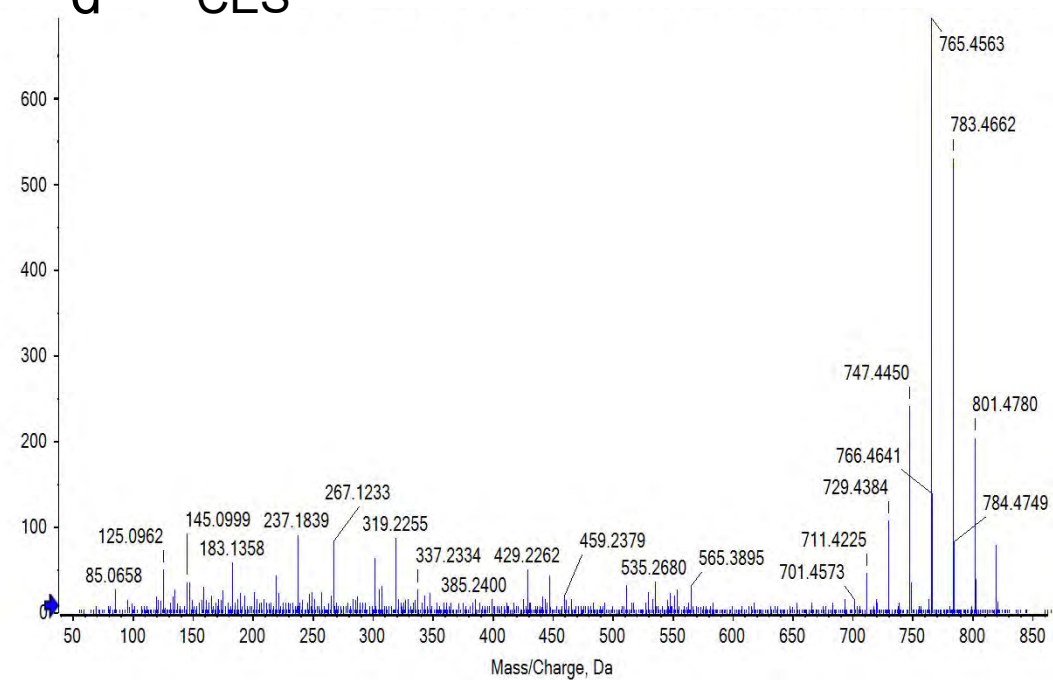

# 54. Brevetoxin b

**a** 20 eV

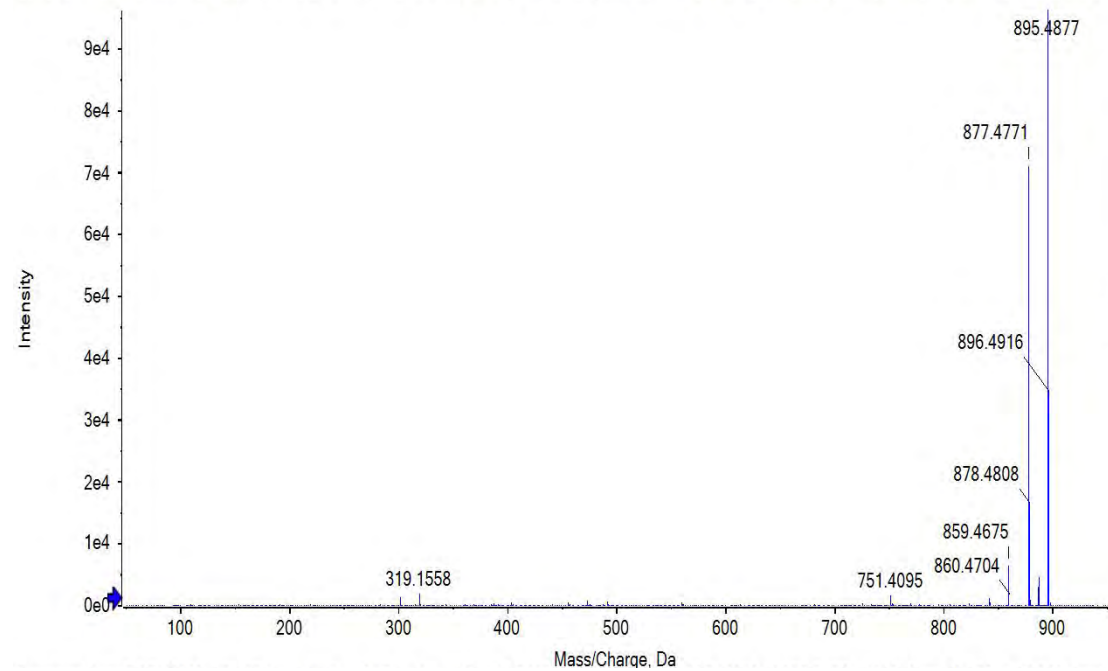

**b** 35eV

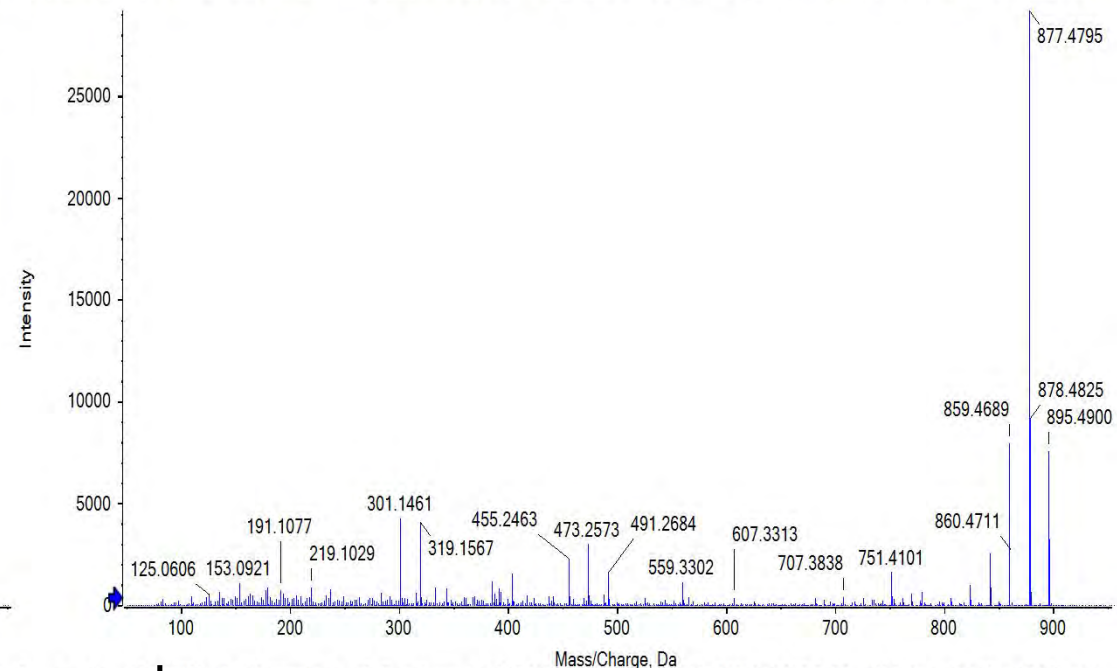

**c** 50 eV

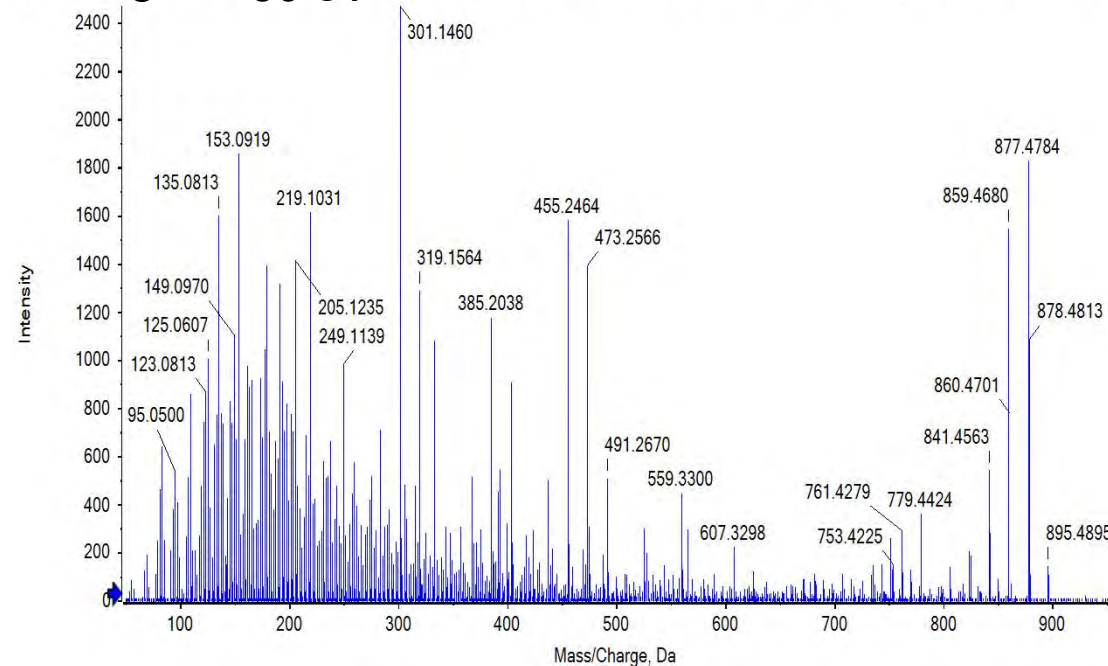

**d** CES

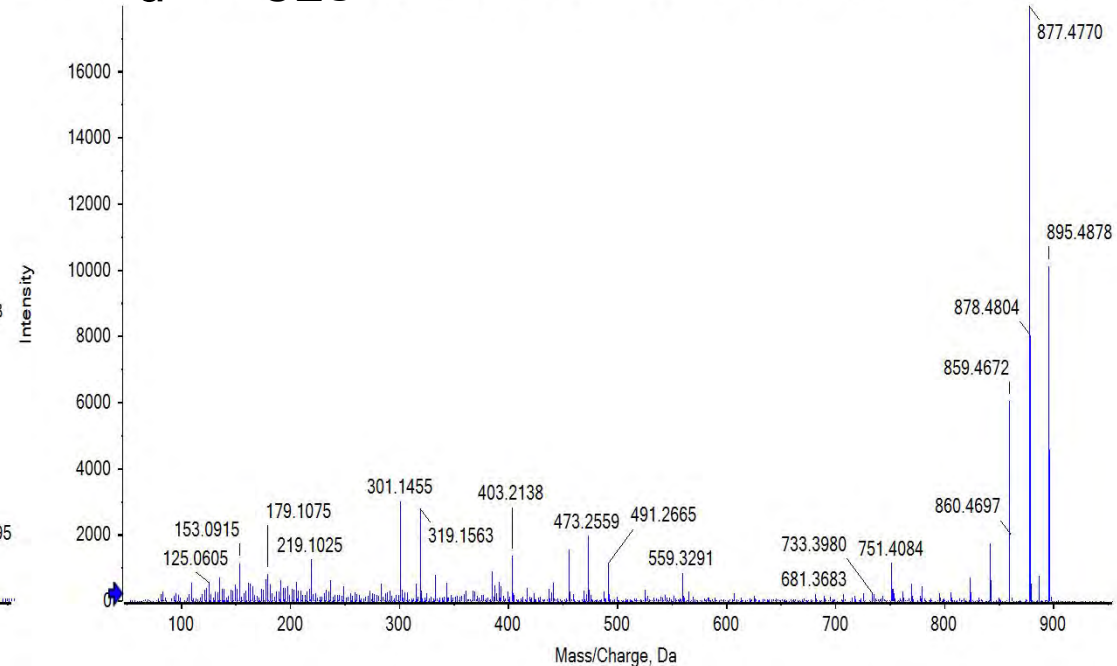

# 55. Dioscin

**a** -20 eV

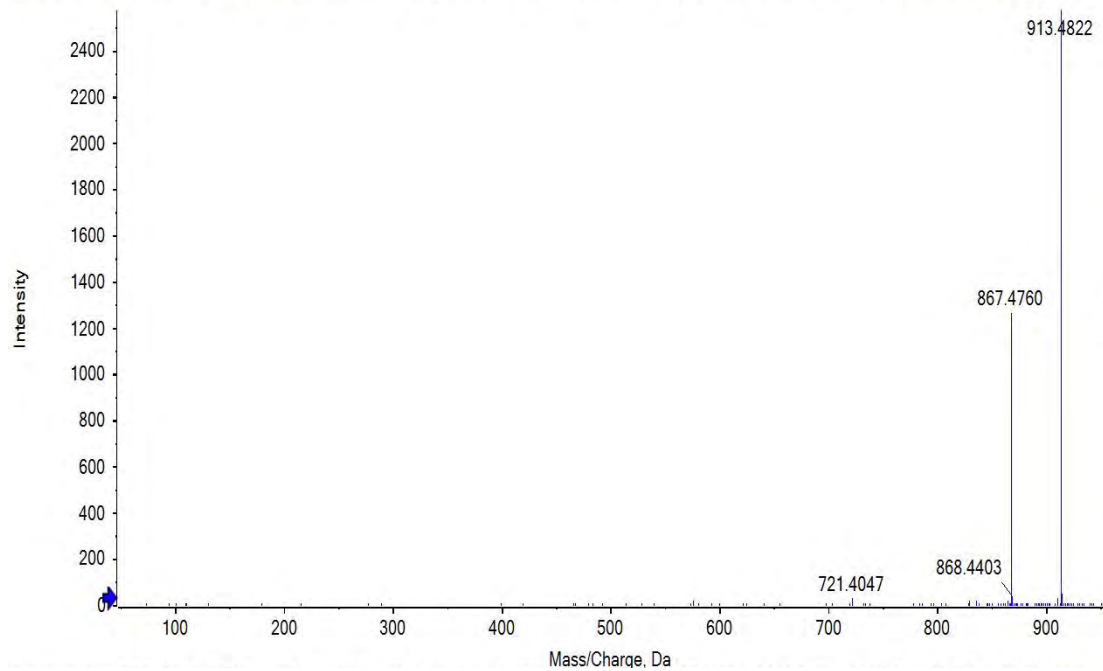

**b** -35eV

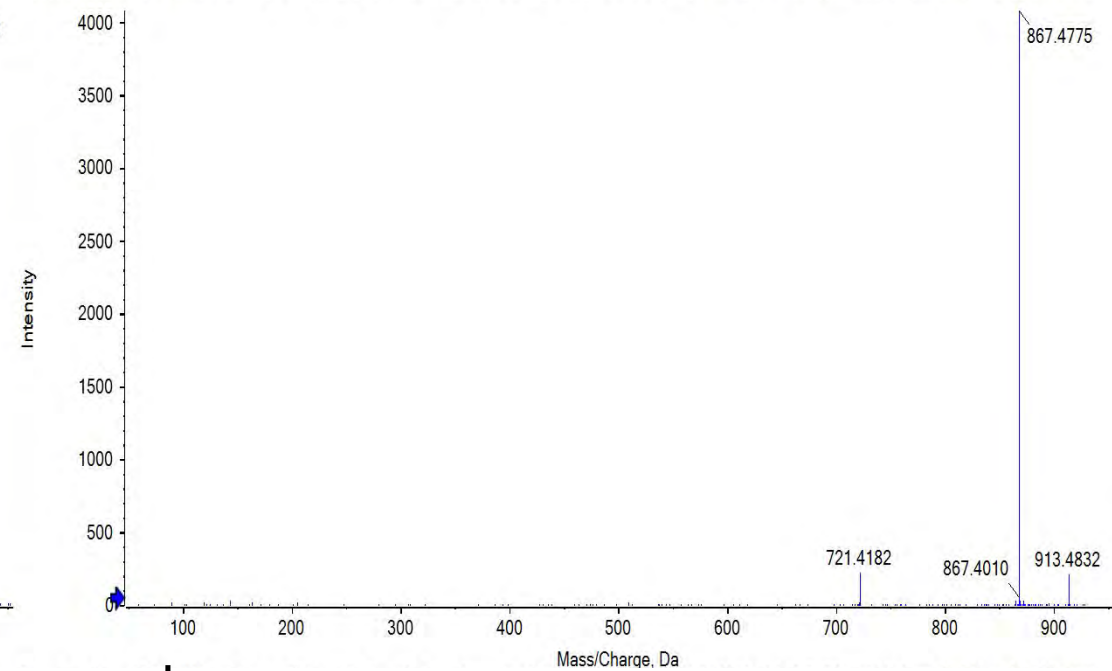

**c** -50 eV

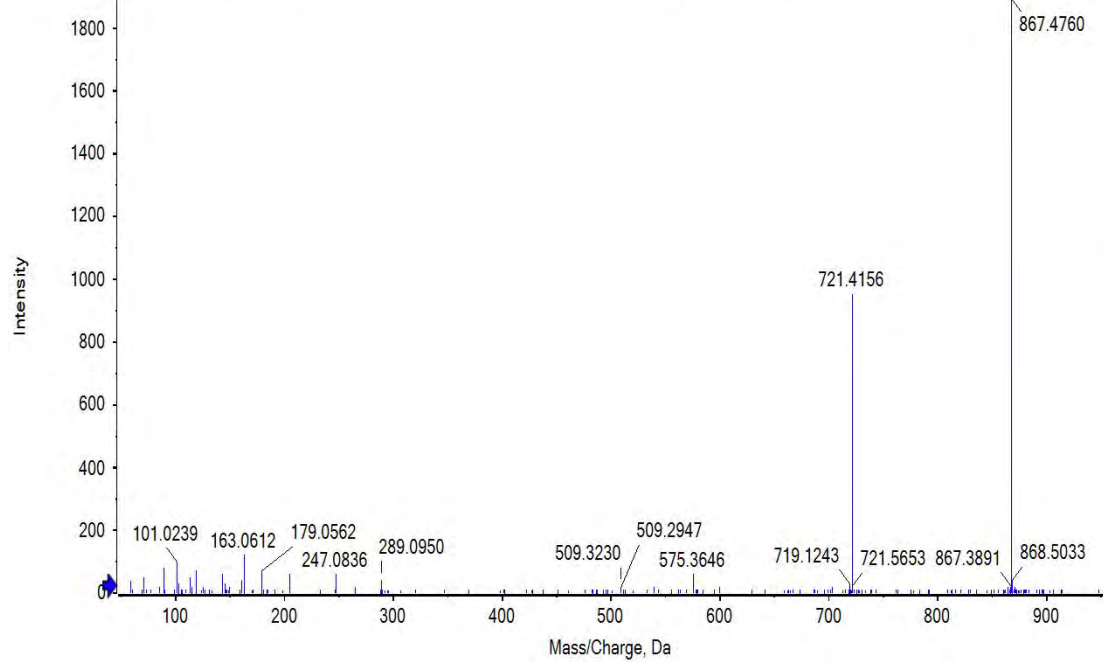

**d** CES

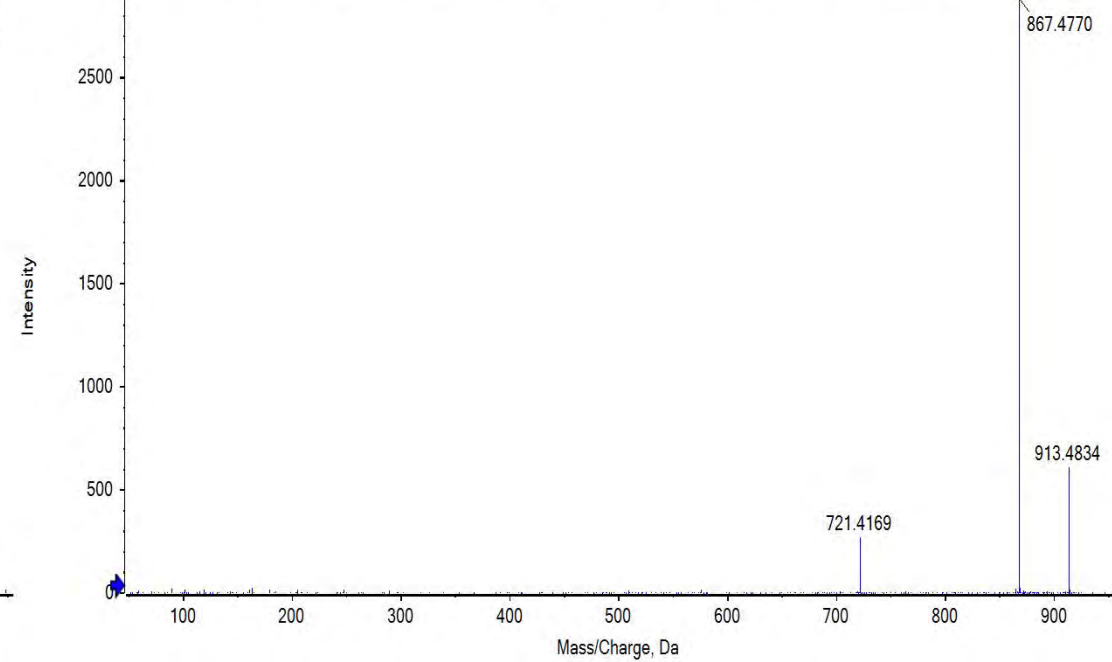

# 56. Diosgenin

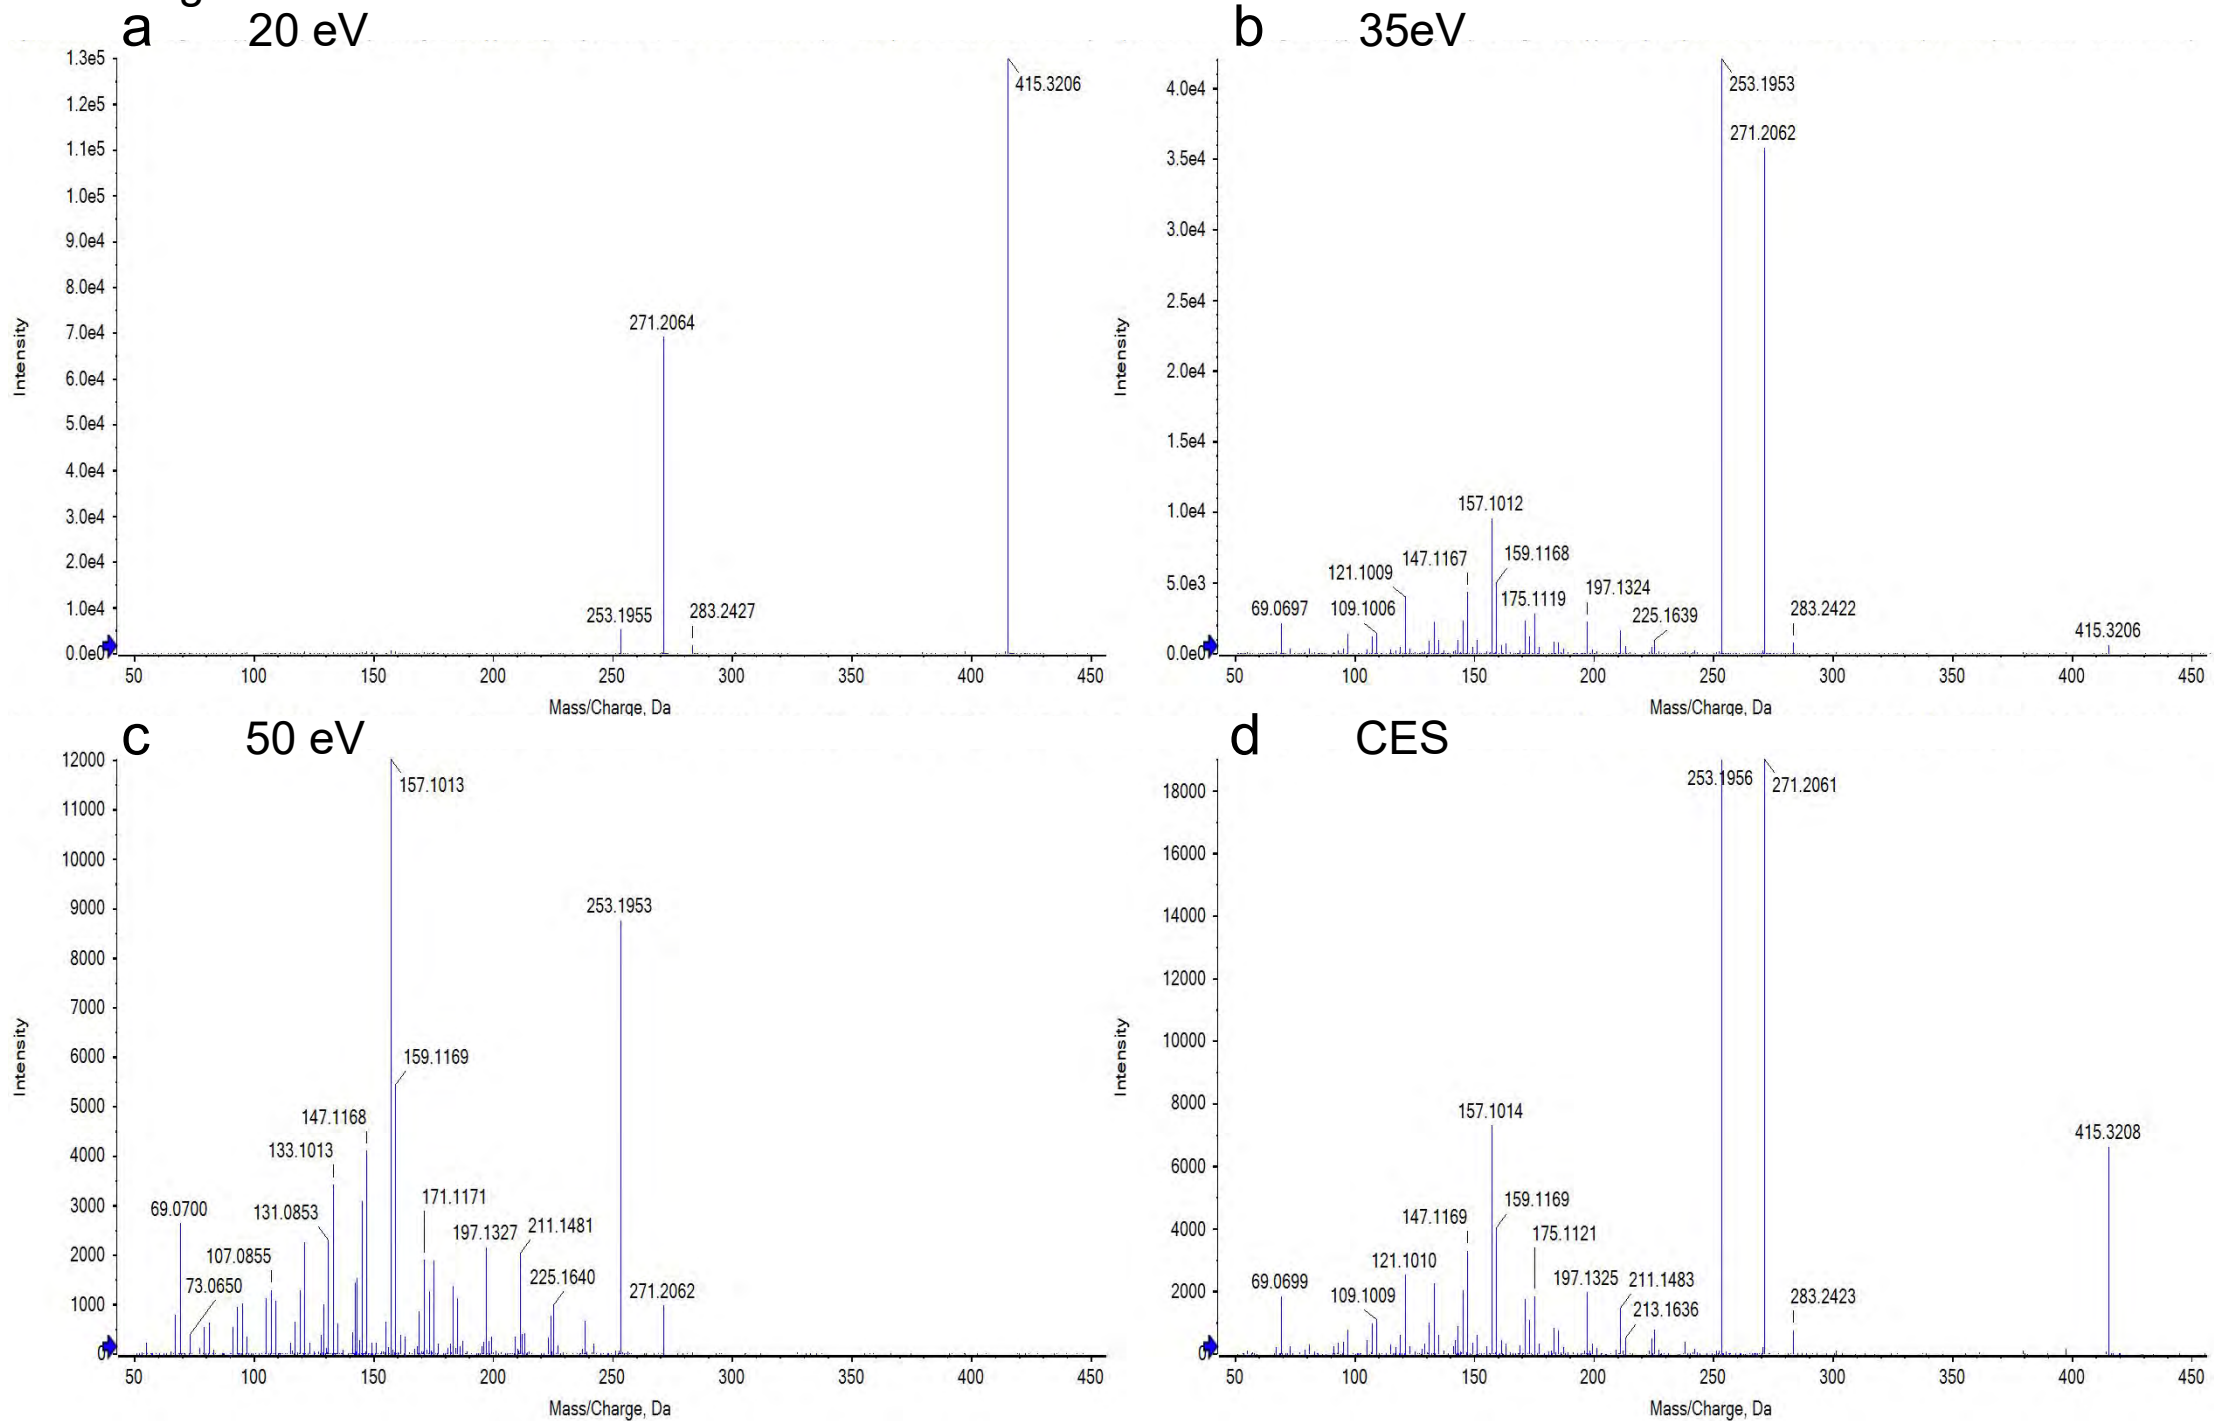

**Fig. S1** Product ion spectra for 56 natural toxic substances at collision energy of **a** 20 eV, **b** 35 eV, **c** 50 eV or **d** CES, obtained by LC-QTOF-MS/MS
